# Supplementary material for: Proteomic Analysis of Vitreous Humor in Retinal Vein Occlusion
Source: PLoS One. 2016 Jun 30;11(6):e0158001. doi: 10.1371/journal.pone.0158001 (PMC4928959; doi:10.1371/journal.pone.0158001)
Supplement: S3 Table — (XLS) [file pone.0158001.s004.xls]

## Sheet: Raw Data-all detected peptides
PeptideID	Protein (IPI database)	Sequence	Mass [Da]	CE-time [min]	Proteomic Analysis (signal intesity)
					Controls																CRVO														H-CRVO						BRVO
					Sample 1	Sample 2	Sample 3	Sample 4	Sample 5	Sample 6	Sample 7	Sample 8	Sample 9	Sample 10	Sample 11	Sample 12	Sample 13	Sample 14	Sample 15	Sample 16	Sample 1	Sample 2	Sample 3	Sample 4	Sample 5	Sample 6	Sample 7	Sample 8	Sample 9	Sample 10	Sample 11	Sample 12	Sample 13	Sample 14	Sample 1	Sample 2	Sample 3	Sample 4	Sample 5	Sample 6	Sample 1	Sample 2	Sample 3	Sample 4	Sample 5	Sample 6	Sample 7	Sample 8	Sample 9
																					fresh	old	old	old	fresh	fresh	fresh	fresh	fresh	fresh	old	fresh	fresh	fresh	old	fresh	fresh	fresh	old	fresh	fresh	fresh	fresh	fresh	fresh	old	fresh	fresh	fresh
309	Afamin	FLVNLVK	831.533	28.318	0	0	0	0	0	0	0	0	0	0	0	28.796	74.057	0	0	0	0	0	0	0	0	0	0	0	0	0	0	1751.9	0	0	0	0	0	0	0	0	0	0	0	0	0	0	0	0	0
10401	Afamin	LPNNVLQEK	1053.59	30.992	0	0	0	0	148.511	19.777	0	60.082	0	0	0	0	0	0	0	0	0	0	0	0	0	0	0	0	0	0	0	0	5.499	0	0	0	0	0	0	0	0	0	0	0	0	0	0	0	0
22654	Afamin	RHPDLSIPELLR	1444.84	22.444	362.359	214.248	0	0	0	0	43.527	0	93.665	194.811	462.811	189.418	0	0	456.994	0	0	54.579	46.525	47.491	105.358	27.7918	245.85	0	141.719	88.769	19.962	0	30.065	0	55.034	0	0	38.6508	0	112.248	0	0	0	61.144	175.956	34.74	0	46.8438	0
7234	Alpha-1-acid glycoprotein 1	TEDTIFLR	993.439	30.046	0	0	0	11.063	0	0	0	0	7.655	0	21.008	39.192	0	54.12	0	0	0	110.438	0	0	0	0	0	0	0	0	0	0	0	0	145.903	0	0	0	0	17.127	0	0	0	0	0	0	0	0	642.988
13026	Alpha-1-acid glycoprotein 1	SDVVYTDWK	1111.58	30.79	0	278.43	0	529.757	0	132.703	0	593.452	639.865	526.349	1010.77	735.984	674.299	156.207	836.247	0	0	0	0	0	0	327.883	928.552	0	1520.98	810.194	1506.41	0	621.159	0	0	0	0	0	511.467	0	0	0	0	0	1316.65	811.598	0	0	0
14797	Alpha-1-acid glycoprotein 1	WFYIASAFR	1159.56	29.973	9.032	0	25.188	0	0	0	0	79.851	0	0	0	0	0	0	0	0	39.7438	0	0	7.196	0	0	0	0	0	0	0	0	0	0	0	0	88.362	0	0	0	0	108.899	0	0	0	112.072	0	0	1021.31
22651	Alpha-1-acid glycoprotein 1	TYMLAFDVNDEK	1444.73	32.898	8.108	0	0	0	0	0	23.404	0	0	0	0	0	0	0	0	0	0	0	70.15	0	0	0	0	0	0	0	0	0	0	0	0	0	0	0	0	0	0	0	0	0	0	0	0	0	0
22986	Alpha-1-acid glycoprotein 1	TYmLAFDVNDEK	1460.65	32.367	16.387	0	0	88.459	0	0	0	0	0	0	0	0	0	0	0	0	0	0	0	18.75	0	0	0	0	0	0	0	0	17.876	0	0	0	0	0	0	0	0	0	0	0	0	0	0	0	0
27489	Alpha-1-acid glycoprotein 1	EQLGEFYEALDcLR	1683.84	33.636	25.402	0	0	0	0	0	5.487	0	22.255	0	0	65.102	0	0	0	0	0	0	0	0	0	0	0	0	0	0	0	0	0	0	0	0	0	0	0	0	0	0	0	0	0	0	0	0	0
27930	Alpha-1-acid glycoprotein 1	NWGLSVYADKPETTK	1707.94	27.886	0	0	123.364	0	0	0	40.027	251.116	551.755	764.239	0	0	51.875	0	0	0	0	166.795	23.506	0	0	406.902	0	0	0	52.741	32.34	0	46.035	60.4184	493.225	0	104.986	0	0	0	0	0	0	0	0	317.841	977.87	0	0
28870	Alpha-1-acid glycoprotein 1	YVGGQEHFAHLLILR	1752.04	23.638	906.157	302.797	0	192.024	0	0	649.482	0	0	126.345	0	0	345.714	0	0	0	1024.55	1123.79	1195.32	1165.67	1889.95	3270.07	0	0	0	1106.43	1051.03	367.071	0	0	2709.7	0	677.361	4161.85	373.039	1290.73	152.393	0	981.403	0	1655.25	773.437	0	193.126	0
14280	Alpha-1-acid glycoprotein 2	SDVMYTDWK	1143.57	30.689	389.26	235.807	455.583	204.074	0	0	71.181	0	132.463	227.437	297.636	0	152.612	76.773	283.881	0	162.935	126.887	100.605	82.664	109.38	199.848	0	0	360.222	471.889	585.301	0	132.125	37.4174	242.473	0	172.923	111.684	156.535	399.158	0	0	0	225.588	185.59	94.205	314.978	528.91	305.249
18251	Alpha-1-acid glycoprotein 2	SDVMYTDWKK	1271.53	24.197	0	0	37.776	0	0	0	0	0	0	0	0	0	0	0	0	0	0	0	0	0	0	0	0	0	0	0	0	0	0	0	0	0	0	0	0	0	0	0	0	0	0	0	0	0	0
22114	Alpha-1-acid glycoprotein 2	TLMFGSYLDDEK	1417.6	32.571	0	574.469	0	50.164	0	0	0	0	0	0	0	0	0	0	0	0	0	0	0	0	0	0	0	0	0	0	0	50.803	0	0	0	0	0	0	0	0	0	0	0	0	0	0	0	0	0
1350525	Alpha-1-acid glycoprotein 2	EHVAHLLFLR	1233.76	21.425	134.328	90.05	0	59.738	0	0	136.756	72.274	232.45	165.624	212.686	0	72.612	0	22.68	0	239.681	187.8	288.098	166.25	394.259	163.002	173.393	0	708.009	359.29	417.99	182.101	143.137	251.476	403.796	0	239.308	185.814	0	14.845	0	64.907	0	68.193	372.623	78.715	0	95.9121	0
637	Alpha-1-antitrypsin	SASLHLPK	851.54	21.978	43.284	64.095	19.451	97.439	0	15.179	82.523	54.963	16.773	101.309	104.591	0	91.94	0	63.198	0	0	110.056	37.663	75.249	0	0	0	0	0	82.263	78.115	0	45.7	0	117.335	0	103.698	0	0	46.51	0	31.828	0	44.412	77.794	98.836	0	0	19.79
1176	Alpha-1-antitrypsin	FLEDVKK	877.52	22.38	12.239	31.006	67.535	150.909	170.319	25.517	0	51.844	32.886	0	61.965	0	80.29	0	0	0	0	71.462	35.195	0	0	0	0	131.064	0	22.907	0	0	58.398	0	47.703	0	79.293	0	0	26.408	0	0	0	0	36.648	73.618	0	0	133.674
3259	Alpha-1-antitrypsin	FLENEDR	921.482	28.736	0	0	0	0	0	0	158.765	287.563	0	0	0	0	0	0	0	0	0	107.151	0	0	0	0	0	0	0	0	108.396	0	0	0	72.317	0	0	0	0	0	0	0	0	0	0	82.611	0	0	0
7906	Alpha-1-antitrypsin	QINDYVEK	1007.55	29.752	0	0	0	0	0	0	250.948	0	235.997	497.514	746.965	398.328	0	322.016	284.425	1263.83	291.517	311.832	0	172.67	176.701	0	596.71	0	0	0	0	0	0	88.8414	340.408	1102.18	257.038	182.858	285.869	197.032	0	605.237	207.578	937.407	608.426	297.802	1033.63	122.321	223.721
8251	Alpha-1-antitrypsin	SVLGQLGITK	1014.54	31.16	0	0	0	0	0	0	13.715	0	0	0	0	0	0	0	0	0	0	0	0	11.2	0	8.0862	0	0	0	0	0	0	52.204	0	0	0	52.699	0	0	0	34.896	0	0	0	31.801	0	0	0	0
11532	Alpha-1-antitrypsin	LSSWVLLMK	1075.6	31.555	0	0	0	0	0	36.018	0	0	0	0	0	0	0	0	0	0	0	0	0	0	0	0	0	0	0	0	0	0	0	0	0	0	0	0	0	0	0	0	0	0	0	0	0	0	0
12079	Alpha-1-antitrypsin	WERPFEVK	1089.61	23.387	0	53.541	89.344	126.568	0	0	37.284	365.559	74.035	17.623	0	0	0	0	0	0	161.76	223.335	330.102	20.042	34.6548	124.682	0	0	0	0	0	0	46.618	62.4518	129.521	0	124.946	138.874	0	30.904	0	148.42	107.741	0	285.048	248.255	0	0	0
12973	Alpha-1-antitrypsin	LSITGTYDLK	1109.56	31.452	0	58.566	0	0	0	0	0	0	0	0	0	0	0	0	0	0	1480.43	0	0	0	0	0	0	0	0	0	0	0	0	0	0	0	0	1525.38	0	0	0	0	0	0	0	0	0	0	0
13864	Alpha-1-antitrypsin	KQINDYVEK	1135.57	24.43	0	20.803	0	0	0	0	0	0	0	37.137	0	0	0	0	0	0	0	0	0	0	0	0	0	0	0	0	0	0	0	0	0	0	0	0	0	0	0	0	0	0	0	0	0	0	0
15691	Alpha-1-antitrypsin	LGMFNIQHcK	1188.51	23.569	0	0	0	0	0	0	0	0	0	24.254	0	0	16.658	0	42.965	0	0	0	18.143	11.506	0	0	0	0	111.265	0	0	53.381	65.478	0	152.573	0	0	0	0	0	0	0	0	0	0	0	1956.04	0	0
16060	Alpha-1-antitrypsin	KLSSWVLLMK	1203.62	24.459	0	0	0	0	0	0	0	0	0	0	0	0	0	0	0	0	0	0	0	0	0	0	0	0	0	0	0	0	69.437	0	0	0	0	0	0	0	0	0	0	0	0	0	0	0	0
16086	Alpha-1-antitrypsin	LVDKFLEDVK	1204.71	24.664	0	0	0	0	0	0	93.346	0	0	0	0	0	0	0	0	0	42.5383	0	0	121.963	0	0	0	0	0	0	111.745	0	0	0	68.676	0	43	0	0	0	0	0	0	0	0	0	0	0	0
18394	Alpha-1-antitrypsin	GKWERPFEVK	1274.73	23.656	0	0	0	0	0	0	0	0	0	0	0	0	0	0	0	0	0	0	0	0	0	0	0	0	0	0	0	0	0	0	0	247.98	0	0	0	0	38.902	0	248.687	0	0	0	0	0	0
25317	Alpha-1-antitrypsin	DTVFALVNYIFFK	1575.71	33.044	0	0	0	0	0	0	0	0	0	0	0	0	0	0	0	0	0	0	0	0	0	0	0	0	0	0	0	0	0	0	0	42.996	0	0	0	0	0	0	0	0	0	0	3241.54	0	0
26676	Alpha-1-antitrypsin	ITPNLAEFAFSLYR	1640.88	33.106	539.324	140.22	0	0	0	0	650.696	0	4.18	0	0	0	0	0	0	0	1224.02	617.042	0	1655.09	1045.22	788.86	0	0	0	0	0	258.658	0	0	818.039	0	1182.5	0	132.294	1854.54	0	694.927	804.959	2079.83	1372.16	526.155	0	88.4011	0
29303	Alpha-1-antitrypsin	TDTSHHDQDHPTFNK	1778.82	23.949	893.512	656.625	1281.05	2951.89	1683.76	748.945	44.542	14.529	0	588.711	1092.44	858.288	430.709	223.234	382.336	0	0	0	0	0	0	44.4348	785.029	0	0	39.232	0	0	44.686	183.672	0	477.265	0	74.2231	473.885	34.129	33.322	0	67.991	0	62.585	0	298.959	601.883	448.674
29745	Alpha-1-antitrypsin	LQHLENELTHDIITK	1803.05	24.137	558.879	1627	2007.72	4184.09	0	498.973	1162.23	2295.78	1456.38	881.36	912.297	999.664	1984.15	1739.51	774.67	0	1430.09	1607.82	2063.1	578.217	1391.64	3128.55	733.908	0	1444.76	1050.6	2019.83	433.015	1425.16	1444.2	1853.07	920.276	1122.75	2890.2	595.689	549.098	470.174	659.904	1284.94	452.414	1415.02	1668.66	143.731	1120.24	1230.21
30234	Alpha-1-antitrypsin	VFSNGADLSGVTEEAPLK	1833.01	34.918	2699.25	3163.97	0	0	0	0	12.261	0	1260.93	2459.53	3847.87	3494.44	2004.92	3334.96	3731.78	1738.86	0	0	0	0	0	0	3397.05	0	0	2741.98	3357.39	1644.82	2874.95	0	0	0	0	0	0	0	0	114.957	0	7877.78	0	0	5991.61	0	3192.77
30672	Alpha-1-antitrypsin	FNKPFVFLMIEQNTK	1855.04	28.092	107.519	0	0	0	0	0	522.36	0	230.427	0	0	0	0	0	0	0	419.787	596.132	0	0	131.496	438.209	0	0	0	0	0	0	0	71.029	700.029	0	244.973	289.077	0	567.489	0	0	376.886	0	0	0	0	0	0
31300	Alpha-1-antitrypsin	DTEEEDFHVDQVTTVK	1890.96	30.451	912.163	1691.32	0	3323.01	0	1298.42	817.365	1849.69	1627.18	1874.07	992.979	1911.77	2630.22	1633	2406.53	1763.35	1108.71	1291.22	1946.99	1321.92	1790.94	1261.95	1638.04	735.36	1650.61	713.689	1643.39	2372.32	1801.66	0	2059.73	3007.25	1024.78	1157.23	707.998	894.963	1210.92	1156.26	1922.73	4265.19	3901.55	1649.24	3680.37	2328.61	2376.18
34039	Alpha-1-antitrypsin	LYHSEAFTVNFGDTEEAK	2057.07	29.975	48.568	0	0	0	0	0	0	3513.13	1033.04	665.959	0	306.565	131.294	0	0	0	1763.38	2291.81	0	767.648	332.464	0	0	0	0	316.526	2142.84	830.958	472.053	0	1465.87	470.14	1392.86	0	0	0	1272.7	0	0	4590.57	29.91	2703.59	0	312.866	519.051
34483	Alpha-1-antitrypsin	ELDRDTVFALVNYIFFK	2089.19	30.207	0	0	0	0	0	0	16.857	0	185.158	0	0	170.062	0	0	0	0	46.3705	0	0	135.858	0	263.581	0	0	0	0	0	0	0	0	0	0	0	235.356	0	1280.41	0	0	0	0	0	0	0	0	0
35422	Alpha-1-antitrypsin	VFSNGADLSGVTEEAPLKLSK	2161.22	31.157	415.095	257.95	0	0	0	0	10.03	0	0	189.62	0	43.004	0	0	0	0	0	0	0	37.836	0	0	0	0	0	0	0	0	0	0	34.882	0	0	0	0	142.274	37.589	0	0	0	0	0	0	0	0
35730	Alpha-1-antitrypsin	LYHSEAFTVNFGDTEEAKK	2185.15	25.862	1052.26	1339.77	0	0	0	0	840.068	458.255	480.377	343.579	498.807	488.883	481.464	163.435	268.102	0	101.739	127.481	285.367	121.858	1051.16	1267.92	691.364	0	1243.74	812.385	528.512	412.329	598.711	602.1	187.908	1131.12	123.822	917.342	675.169	1438.94	23.264	378.629	228.759	465.08	408.924	141.962	611.293	587.614	115.619
36893	Alpha-1-antitrypsin	GTEAAGAMFLEAIPMSIPPEVK	2258.24	36.01	2210.02	1023.19	0	249.157	0	0	1749.26	0	1006.29	780.871	350.967	281.129	450.452	886.816	611.247	0	549.27	358.749	155.136	842.109	1827.07	2438.69	777.613	0	599.392	866.981	857.486	492.171	570.843	500.168	566.149	1667.98	626.863	1228.19	896.347	713.291	1087.28	283.495	411.177	533.46	290.686	258.46	765.904	958.84	826.118
37106	Alpha-1-antitrypsin	GTEAAGAmFLEAIPMSIPPEVK	2274.11	34.34	0	0	0	0	0	0	0	0	0	0	0	0	0	0	0	0	0	0	0	0	0	0	0	0	0	0	0	0	0	0	0	0	0	0	0	0	0	0	0	0	0	0	0	0	0
41499	Alpha-1-antitrypsin	TLNQPDSQLQLTTGNGLFLSEGLK	2573.13	34.994	0	0	94.211	0	0	0	0	0	0	0	0	0	0	0	0	0	0	0	0	0	0	0	0	0	0	0	0	0	0	0	0	0	0	0	0	0	0	0	0	0	0	0	0	0	0
11962	Alpha-1B-glycoprotein	ATWSGAVLAGR	1087.53	29.826	0	0	0	0	0	84.072	0	0	0	0	0	0	0	0	0	0	0	0	0	0	0	0	0	0	0	0	0	0	0	0	0	0	25.813	0	0	0	0	0	0	0	0	0	0	0	0
17935	Alpha-1B-glycoprotein	SGLSTGWTQLSK	1263.55	31.784	0	0	0	0	0	0	0	0	0	0	0	0	0	0	0	0	0	0	0	0	0	0	0	0	0	0	0	0	0	0	0	0	0	0	0	0	0	0	0	0	0	0	0	0	0
21081	Alpha-1B-glycoprotein	HQFLLTGDTQGR	1371.6	25.378	0	40.955	0	0	0	0	0	0	0	0	0	0	0	0	0	0	0	0	0	0	0	0	0	0	0	0	0	0	0	0	0	0	0	0	0	0	0	0	0	0	0	0	0	0	0
27307	Alpha-1B-glycoprotein	NGVAQEPVHLDSPAIK	1673.86	27.588	0	0	0	0	0	0	0	0	0	0	0	0	0	0	0	0	0	0	0	0	0	0	0	0	0	0	0	0	0	0	0	0	0	0	0	0	0	0	0	0	0	0	0	0	0
1350535	Alpha-1B-glycoprotein	LETPDFQLFK	1236.57	31.658	0	0	0	289.073	0	0	0	0	44.542	0	0	0	0	0	0	0	0	0	0	0	0	653.409	0	0	0	0	0	0	0	0	0	46.337	106.297	0	0	0	119.378	0	0	366.257	0	90.984	0	0	0
32488	Alpha-2-HS-glycoprotein	TVVQPSVGAAAGPVVPPcPGR	1957.03	34.806	0	23.286	0	0	0	0	34.443	39.786	0	33.245	0	0	0	0	0	0	0	0	0	0	0	61.4031	0	0	0	46.467	0	0	0	0	0	0	0	0	0	0	0	0	0	0	0	0	0	0	0
34345	Alpha-2-HS-glycoprotein	HTFMGVVSLGSPSGEVSHPR	2079.97	24.476	0	0	0	0	0	0	0	0	0	0	0	0	0	0	0	0	0	0	0	0	0	0	0	0	0	0	0	0	0	0	22.574	0	0	0	0	0	0	0	0	0	0	7.94	0	0	0
1348547	Alpha-2-HS-glycoprotein	FSVVYAK	812.473	27.979	0	0	0	0	0	0	32.941	43.668	0	89.382	247.364	0	0	38.947	39.003	0	0	68.368	67.205	37.26	0	0	0	0	0	0	0	0	0	0	0	0	0	0	0	19.57	0	0	36.871	102.586	0	38.415	179.523	0	0
1350445	Alpha-2-HS-glycoprotein	HTLNQIDEVK	1195.6	23.539	0	0	38.7	0	0	0	0	0	0	0	0	0	0	0	0	0	0	0	0	0	0	0	0	0	0	0	0	0	0	0	0	0	0	0	0	0	0	0	0	0	0	0	0	0	0
272	Alpha-2-macroglobulin	SDIAPVAR	827.445	28.413	4.259	0	20.189	0	0	192.95	0	526.151	0	0	0	0	0	0	0	0	0	0	0	0	0	0	0	0	0	17.649	0	17.063	0	0	0	0	0	0	0	0	0	0	0	0	0	0	0	0	0
1737	Alpha-2-macroglobulin	YGAATFTR	885.447	27.21	0	0	0	0	0	0	0	0	5.349	17.768	65.326	51.838	0	0	0	0	0	0	0	0	0	0	171.375	0	0	0	0	0	0	0	19.716	0	0	0	0	0	0	0	0	0	0	0	31.998	0	0
7864	Alpha-2-macroglobulin	FQVDNNNR	1005.51	29.888	0	0	0	0	0	0	0	0	3.958	26.248	62.704	206.232	0	0	0	0	0	0	0	0	0	0	0	869.135	0	0	0	8529.27	0	0	6.855	0	180.775	0	0	7.353	0	0	0	0	16.514	0	57.916	0	0
9941	Alpha-2-macroglobulin	FEVQVTVPK	1045.59	31.08	0	65.371	326.074	53.175	0	0	24.023	221.179	18.137	21.056	63.018	0	40.357	0	219.966	1085.19	0	59.217	53.954	14.591	0	44.6733	0	1319.5	0	31.584	23.929	62.221	67.068	0	98.992	42.548	234.616	0	0	11.403	80.726	8.155	12.962	24.421	0	28.848	68.191	0	83.139
13131	Alpha-2-macroglobulin	QTVSWAVTPK	1115.61	31.668	106.761	211.676	0	80.285	0	78.174	158.155	45.299	198.088	194.928	221.111	563.107	473.212	323.622	277.802	0	22.1267	130.085	49.898	88.901	138.352	143.045	564.357	0	175.792	188.514	217.941	45.782	239.939	178.291	18.813	746.169	252.937	216.897	49.1389	199.565	145.975	465.384	41.024	1283.81	286.15	177.496	815.56	85.6012	946.26
13801	Alpha-2-macroglobulin	SASNMAIVDVK	1133.59	30.739	0	0	0	0	0	0	16.442	0	0	0	0	0	0	0	0	0	0	34.29	0	0	0	0	0	0	0	0	0	0	0	0	85.766	0	0	0	0	0	0	152.888	0	0	0	0	0	0	100.101
14413	Alpha-2-macroglobulin	QGIPFFGQVR	1147.61	30.728	0	0	0	0	0	0	0	0	0	0	0	0	0	0	0	0	0	0	0	0	0	0	0	0	0	162.085	0	208.938	0	0	0	0	26957.2	0	0	71.768	55.848	0	0	0	0	0	0	0	0
16208	Alpha-2-macroglobulin	LPPNVVEESAR	1209.59	31.735	0	152.153	0	0	0	0	5.41	0	0	0	0	0	0	0	0	0	0	0	279.877	0	0	0	0	0	0	0	0	0	0	19.1963	0	593.875	0	0	0	0	0	0	0	0	0	0	0	0	0
17791	Alpha-2-macroglobulin	VGFYESDVMGR	1258.57	31.7	5.404	0	0	0	0	0	0	0	0	0	0	0	0	0	0	0	0	0	0	0	0	0	0	0	0	0	0	85.596	0	0	0	0	0	0	0	0	0	0	0	0	0	0	0	0	0
22090	Alpha-2-macroglobulin	MVSGFIPLKPTVK	1415.9	26.476	0	0	0	0	0	0	0	0	0	0	0	0	0	0	0	0	0	0	0	0	0	0	0	0	0	0	0	0	0	0	8.929	0	199.091	56.2515	0	5.789	0	0	0	0	0	0	0	0	0
22117	Alpha-2-macroglobulin	HYDGSYSTFGER	1417.68	24.078	0	0	0	0	0	0	2.963	18.54	0	0	0	0	0	0	0	0	0	0	0	39.418	0	0	0	0	0	0	0	0	0	0	0	0	0	0	0	50.778	0	33.311	0	0	0	0	0	0	0
22728	Alpha-2-macroglobulin	DMYSFLEDMGLK	1447.58	32.054	0	0	0	0	0	0	0	0	0	0	0	0	0	0	0	0	0	0	0	0	0	157.787	0	0	0	0	67.203	0	0	0	0	0	0	0	0	0	0	0	0	0	0	0	0	0	0
23537	Alpha-2-macroglobulin	NQGNTWLTAFVLK	1490.82	33.004	14.348	18.554	0	0	0	0	39.772	0	3.555	0	22.018	0	145.324	0	0	0	0	73.579	0	15.203	0	0	0	0	0	0	0	0	0	0	111.278	0	214.574	50.3604	0	25.46	34.323	0	0	0	0	22.298	0	0	0
24663	Alpha-2-macroglobulin	LVHVEEPHTETVR	1544.73	22.28	0	0	0	0	0	0	0	0	0	0	0	0	0	0	0	0	0	0	0	0	0	0	0	0	0	0	42.551	0	0	0	0	0	0	0	0	0	0	0	0	0	0	0	0	0	0
27275	Alpha-2-macroglobulin	TEHPFTVEEFVLPK	1671.93	27.798	0	0	0	0	0	0	14.939	0	0	0	0	0	0	0	0	0	0	19.566	0	0	0	128.972	0	0	0	79.613	0	0	0	0	18.936	0	466.664	284.337	0	0	0	0	0	0	0	146.726	0	0	22.494
29311	Alpha-2-macroglobulin	DTVIKPLLVEPEGLEK	1778.93	28.262	0	0	0	0	0	0	0	0	0	54.805	0	0	0	0	0	0	0	0	52.549	0	0	0	0	0	0	0	0	0	0	0	0	0	31.516	0	0	0	0	0	0	0	0	0	0	0	0
1350163	Alpha-2-macroglobulin	SSGSLLNNAIK	1102.54	32.509	0	24.025	0	0	0	0	0	0	0	0	0	0	0	0	0	0	0	0	0	1.835	0	0	0	0	0	0	0	0	0	0	0	100.255	0	0	0	0	11.287	226.954	0	0	0	0	0	0	0
6750	Alpha-crystallin B chain	HFSPEELK	985.56	22.793	0	0	162.843	0	0	0	0	0	0	0	0	0	0	0	239.196	0	0	0	0	0	0	0	0	0	0	0	0	0	0	0	0	0	0	0	0	0	0	0	0	0	0	0	0	0	60.221
11964	Alpha-crystallin B chain	QDEHGFISR	1087.57	23.763	0	0	181.935	0	276.286	0	0	0	0	0	0	0	0	0	153.371	0	0	0	0	0	0	0	0	0	0	0	0	0	0	0	0	0	0	0	0	0	0	0	0	0	0	0	0	0	0
14165	Alpha-crystallin B chain	EEKPAVTAAPK	1139.59	24.796	22.828	23.975	139.728	0	0	0	0	0	14.001	0	0	0	0	0	0	0	0	0	0	0	0	0	0	0	0	28.362	0	194.753	0	0	0	0	0	0	0	0	0	0	0	0	0	0	0	0	0
15028	Alpha-crystallin B chain	VLGDVIEVHGK	1164.71	25.032	0	0	0	0	0	0	0	0	0	0	0	0	0	0	1083.17	0	0	0	0	0	0	0	0	0	0	0	0	0	0	0	0	0	0	0	0	0	0	0	0	0	0	0	0	0	0
23637	Alpha-crystallin B chain	APSWFDTGLSEMR	1495.72	32.654	0	0	0	0	0	108.765	0	0	0	0	0	0	0	0	0	0	0	0	0	0	0	0	0	0	0	0	0	0	0	0	0	0	0	0	0	0	0	0	0	0	0	0	0	0	0
4384	Amyloid-like protein 2	VEAMLNDR	946.512	28.968	0	0	0	0	0	0	0	73.697	3.817	0	0	0	0	0	0	0	0	0	0	0	0	0	0	0	0	0	0	0	0	0	0	0	54.925	0	0	0	0	0	0	95.788	0	0	0	0	0
6749	Amyloid-like protein 2	AKEQLEIR	985.525	21.111	17.419	19.352	0	78.97	0	0	16.536	0	31.977	41.334	0	0	0	0	19.548	0	0	9.302	0	22.051	0	0	0	0	0	34.773	26.071	0	50.856	0	0	0	0	0	0	19.347	0	0	0	13.889	23.324	0	0	0	0
15822	Amyloid-like protein 2	QQLVETHLAR	1193.69	24.785	0	0	0	0	0	0	0	0	0	0	0	0	0	0	0	0	0	0	0	0	0	0	0	196.082	0	0	0	0	0	0	0	0	0	0	0	0	0	0	0	0	0	0	0	0	0
16947	Amyloid-like protein 2	EWEEAELQAK	1231.49	29.628	0	0	0	0	0	0	0	0	0	0	0	0	0	0	0	0	0	0	0	0	0	0	0	0	0	0	0	0	0	0	0	0	0	0	0	0	0	0	0	0	0	0	0	0	13.663
22472	Amyloid-like protein 2	HYQHVLAVDPEK	1434.79	22.46	0	0	0	0	0	0	0	66.557	0	0	0	0	0	0	0	0	0	0	0	0	0	0	0	0	0	0	0	0	19.026	0	0	0	0	0	0	0	0	0	0	0	0	49.557	0	0	0
22628	Amyloid-like protein 2	QTLIQHFQAMVK	1442.79	26.342	223.07	0	0	0	0	0	0	0	0	0	0	0	0	0	0	0	0	0	0	54.905	0	0	0	0	0	0	0	0	0	0	0	0	0	0	0	3.991	0	0	0	0	0	0	0	0	0
25776	Amyloid-like protein 2	GSGVGEQDGGLIGAEEK	1601.65	33.217	0	0	0	0	0	31.76	0	0	0	0	0	0	0	0	0	0	0	0	0	0	0	0	0	0	0	0	0	0	0	0	0	1038.49	0	0	0	0	0	0	0	0	0	0	0	0	122.107
18108	Angiotensinogen	ALQDQLVLVAAK	1267.72	32.203	0	52.007	0	0	0	0	0	116.792	0	84.631	65.441	0	0	0	112.43	0	0	0	0	131.68	0	0	0	0	0	64.686	32.999	0	0	0	0	0	0	0	0	0	415.229	0	0	0	0	0	0	0	293.487
18953	Angiotensinogen	DPTFIPAPIQAK	1296.63	31.474	0	0	0	0	0	0	0	0	0	0	0	0	0	0	0	0	0	0	0	0	0	0	0	0	0	0	0	0	0	0	0	0	0	0	0	0	0	0	0	0	0	0	0	0	0
22503	Angiotensinogen	SLDFTELDVAAEK	1436.69	32.194	741.693	448.902	0	669.152	0	0	0	0	0	35.573	0	0	0	64.828	0	0	0	0	0	0	87.3667	129.034	34.609	0	0	0	0	0	48.058	0	0	45.832	0	0	0	0	0	0	0	0	0	0	0	0	71.025
733	Antithrombin-III	LQPLDFK	859.543	28.576	0	0	0	0	0	0	0	0	0	0	0	0	0	0	0	0	0	0	0	0	0	0	0	0	0	135.514	0	0	0	0	0	0	0	0	0	0	0	0	0	98.798	0	0	0	0	0
2458	Antithrombin-III	LPGIVAEGR	910.56	29.656	0	0	0	0	0	0	0	66.932	0	0	0	0	0	0	0	0	0	41.066	70.646	0	0	0	0	0	0	0	34.238	0	0	0	76.376	0	71.067	0	0	6.558	0	53.353	0	63.359	39.02	33.557	0	0	0
2994	Antithrombin-III	RVWELSK	916.569	22.315	20.288	0	0	0	0	0	11.744	0	0	15.713	13.288	0	0	0	0	0	0	0	0	0	0	0	0	0	0	0	0	0	7.207	0	0	0	0	0	0	0	0	0	0	0	0	0	0	0	0
11073	Antithrombin-III	SKFSPENTR	1064.58	24.65	0	17.113	0	0	0	835.811	0	453.942	0	0	0	0	0	0	0	0	0	0	0	0	0	0	0	0	0	0	0	0	0	0	0	0	0	0	0	0	0	0	0	0	0	0	0	0	0
16257	Antithrombin-III	FRIEDGFSLK	1210.68	24.566	0	188.666	0	0	0	0	22.706	159.188	59.865	140.851	0	0	0	0	0	0	166.154	119.501	0	104.075	0	132.753	0	0	90.8821	0	0	0	0	93.5758	95.733	0	83.428	84.6947	0	0	0	0	0	0	0	0	0	0	0
16962	Antithrombin-III	ANRPFLVFIR	1231.63	26.534	0	0	0	0	0	0	14.876	0	0	0	0	0	0	0	0	0	0	0	0	7.592	0	0	0	0	0	20.511	0	0	0	0	0	0	0	0	0	0	0	45.527	0	0	0	0	0	0	0
19247	Antithrombin-III	DDLYVSDAFHK	1308.67	26.932	0	133.989	73.238	105.702	0	0	348.959	263.975	141.248	0	222.293	0	183.184	146.476	191.455	0	200.183	153.537	234.431	204.196	0	237.642	0	0	333.165	0	181.832	52.623	96.577	161.132	268.548	0	70.362	0	161.063	85.445	103.611	255.47	198.497	146.446	287.485	138.448	0	88.3828	105.47
21432	Antithrombin-III	EVPLNTIIFMGR	1388.77	32.447	0	0	0	0	0	0	308.252	0	190.269	202.877	0	0	0	0	319.576	0	310.444	202.647	0	264.37	0	347.297	0	0	0	0	0	0	586.145	71.2302	404.071	0	255.21	128.469	219.392	69.75	146.192	0	152.734	0	0	0	738.095	233.299	0
22354	Antithrombin-III	VAEGTQVLELPFK	1429.78	33.075	24.676	0	0	0	0	0	0	0	114.362	79.982	31.629	0	256.062	406.067	0	0	0	54.115	28.088	4.462	0	0	0	0	0	0	0	0	0	0	29.909	0	258.501	72.6014	57.2971	194.053	146.632	0	0	0	226.325	83.195	0	173.136	186.541
24350	Antithrombin-III	FATTFYQHLADSK	1527.83	26.639	0	0	0	0	0	0	73.612	0	14.827	0	0	0	0	0	0	0	0	16.728	0	0	0	0	0	0	0	0	9.162	0	0	0	12.468	0	0	17.1005	0	13.304	0	0	0	0	0	0	0	0	0
27207	Antithrombin-III	GDDITMVLILPKPEK	1667.87	28.57	0	0	0	0	0	0	0	41.404	0	0	0	0	0	0	0	0	0	60.733	0	0	0	0	0	0	0	0	0	0	0	0	0	0	199.023	0	0	0	48.4	0	0	0	0	81.26	0	0	0
30538	Antithrombin-III	EQLQDMGLVDLFSPEK	1847.97	34.411	329.481	25.491	0	391.252	0	0	172.076	0	308.347	353.178	265.423	397.02	304.744	671.089	519.446	0	416.712	457.122	301.593	365.212	516.034	424.524	0	0	779.996	247.524	330.797	268.13	520.668	434.643	432.559	629.132	685.123	589.273	531.617	277.31	781.831	121.34	516.286	1059.97	165.766	514.638	739.068	323.454	478.597
8020	Apolipoprotein A-I	AKPALEDLR	1011.62	23.479	363.022	160.124	168.494	352.465	676.987	125.545	232.67	180.45	243.648	359.839	271.794	0	0	0	310.769	0	0	86.025	0	114.962	145.844	0	0	0	0	282.851	0	41.652	0	0	219.533	0	209.51	0	209.498	167.527	0	0	0	0	0	116.188	0	187.283	407.377
9253	Apolipoprotein A-I	LSPLGEEMR	1030.5	29.222	0	0	0	0	0	0	0	5.851	0	0	0	0	0	0	0	0	0	0	0	0	0	0	0	0	0	33.061	933.41	0	0	0	0	0	0	0	0	0	0	0	0	0	0	0	0	0	0
9945	Apolipoprotein A-I	LSPLGEEmR	1046.48	29.011	0	0	0	0	0	0	0	0	0	0	36.487	0	0	0	0	0	0	0	0	0	0	0	39.825	0	0	36.041	0	52.476	0	0	26.814	0	0	0	0	0	0	0	0	0	0	0	0	0	0
14555	Apolipoprotein A-I	QKLHELQEK	1151.69	20.924	256.704	33.053	0	64.524	0	0	125.667	0	40.478	219.949	131.379	210.377	0	0	199.454	0	0	7.398	0	76.447	58.7042	25.9773	0	0	116.906	101.866	82.133	31.98	6.775	0	0	0	0	28.616	0	71.086	0	0	0	0	0	0	0	0	15.076
14734	Apolipoprotein A-I	LEALKENGGAR	1156.63	22.551	0	4.938	0	25.711	0	0	0	0	0	0	0	0	0	0	0	0	0	0	0	0	0	0	0	0	0	0	0	0	0	0	0	0	0	0	0	0	0	0	0	0	0	0	0	0	0
16905	Apolipoprotein A-I	QGLLPVLESFK	1229.67	31.302	0	0	0	0	0	0	0	0	0	0	0	0	0	0	0	0	0	0	1367.23	0	0	0	0	0	0	0	0	0	0	0	0	0	0	0	0	0	0	0	0	0	0	0	0	0	0
17037	Apolipoprotein A-I	DLATVYVDVLK	1234.62	31.512	0	0	0	47.554	0	0	0	0	17.275	0	184.128	0	186.085	0	0	0	101.257	40.543	0	0	0	0	0	0	126.73	0	0	4347.79	0	0	42.49	0	73.307	0	0	0	116.451	0	0	236.176	0	131.802	0	90.271	980.412
17531	Apolipoprotein A-I	VQPYLDDFQK	1251.53	30.942	12.278	0	0	88.188	0	0	0	0	2.041	0	27.615	0	0	0	0	0	0	0	0	0	0	1340.02	0	0	0	0	0	0	0	0	16.189	0	0	0	0	0	0	9.24	0	0	0	0	0	0	0
18588	Apolipoprotein A-I	WQEEMELYR	1282.64	34.027	0	6.484	0	0	0	0	0	0	0	0	0	0	0	0	0	0	0	0	0	0	0	0	0	0	0	0	0	0	0	0	0	0	0	0	0	3.646	0	26.76	0	0	0	0	0	0	0
19012	Apolipoprotein A-I	WQEEmELYR	1298.62	31.589	0	0	0	0	0	0	0	112.681	315.873	423.497	546.452	0	0	353.837	453.442	0	0	73.565	0	31.743	0	0	360.568	0	0	0	0	0	330.613	0	159.345	415.185	285.881	0	0	84.529	350.895	183.711	82.966	726.469	0	162.28	0	0	699.573
19070	Apolipoprotein A-I	THLAPYSDELR	1300.7	22.942	0	0	0	0	0	0	0	0	0	0	0	0	0	0	0	0	0	0	0	0	0	0	0	0	0	0	0	0	0	0	0	0	0	0	0	0	0	0	0	0	0	0	0	0	0
21247	Apolipoprotein A-I	VQPYLDDFQKK	1379.76	27.574	0	0	0	0	0	0	0	0	0	252.023	102.637	0	0	0	0	0	0	0	0	0	0	0	0	0	0	0	0	0	0	0	0	0	0	0	0	0	0	0	0	0	0	34.927	0	0	0
21352	Apolipoprotein A-I	VSFLSALEEYTK	1385.64	30.462	0	0	0	0	0	0	0	0	0	34.972	86.354	91.142	0	0	0	0	0	0	0	0	0	0	0	0	0	0	0	0	0	0	0	0	0	0	0	0	0	0	0	0	0	0	0	0	0
21681	Apolipoprotein A-I	DYVSQFEGSALGK	1399.73	33.426	893.296	818.653	197.653	1439.45	0	176.476	1067.3	672.856	826.755	1084.21	974.898	1222.98	1456.39	859.499	1134.6	0	642.518	0	706.698	595.791	900.741	974.315	631.773	187.075	1051.32	564.819	1065.85	426.057	847.551	541.667	697.589	1319.71	984.576	1052.01	991.029	1003.95	754.039	865.834	542.324	976.547	834.467	992.397	1089.64	1061.16	1500.84
23013	Apolipoprotein A-I	VKDLATVYVDVLK	1461.92	27.071	524.188	0	0	0	0	0	871.281	0	414.013	467.808	374.862	0	0	0	0	0	585.092	168.349	0	446.481	743.324	873.164	0	0	0	328.345	206.492	0	0	120.562	935.022	0	349.5	966.832	0	1028.96	0	0	16.363	0	0	0	0	0	0
23084	Apolipoprotein A-I	VEPLRAELQEGAR	1466.72	25.598	0	0	0	0	0	0	0	0	0	0	0	0	0	0	0	0	0	0	0	0	64.9196	0	0	0	0	121.466	0	0	0	0	0	0	0	0	0	0	0	0	0	0	0	21.256	0	0	0
25945	Apolipoprotein A-I	LLDNWDSVTSTFSK	1611.85	33.595	3136.58	1532.51	618.757	2682.99	0	98.635	2028.39	817.946	1447.62	1526.02	661.664	952.584	3146.48	754.852	269.173	0	2194.33	972.105	1048.13	1016.23	2966.83	2896.82	818.295	0	1224.87	448.062	2794.84	1076.47	860.919	787.208	1655.69	1253.89	2545.38	2553.71	1378.52	1708.99	1547.94	997.461	1203.67	2312.89	856.838	1276.65	749.073	1377.73	780.878
29944	Apolipoprotein A-I	DSGRDYVSQFEGSALGK	1814.83	28.317	0	0	0	0	0	0	0	1420.76	0	0	0	0	0	0	138.547	0	0	2407.82	2689.68	0	0	0	0	0	0	82.492	397.752	247.148	378.226	0	1221.81	0	1848.06	0	0	0	334.414	3022.84	1836.53	1672.28	2457.89	955.817	0	0	0
32052	Apolipoprotein A-I	EQLGPVTQEFWDNLEK	1931.87	34.429	0	0	0	0	0	0	0	0	0	0	0	0	0	0	0	0	0	0	0	0	52.3972	0	0	0	0	0	0	0	0	0	0	0	0	0	0	0	2259.99	0	0	0	0	0	0	0	0
35951	Apolipoprotein A-I	LREQLGPVTQEFWDNLEK	2201.19	29.957	1882.92	96.742	0	0	284.541	0	754.502	116.729	592.589	416.772	147.898	286.709	0	49.668	0	0	712.212	395.712	59.008	407.404	404.148	0	0	0	0	0	214.98	0	156.054	137.687	617.027	149.543	613.061	0	361.097	429.197	216.19	213.724	503.006	0	0	355.795	80.347	0	0
1350652	Apolipoprotein A-I	ETEGLRQEMSK	1306.61	24.866	0	355.352	0	0	0	134.668	0	0	18.066	0	0	0	0	0	0	0	0	0	0	0	0	0	0	0	0	0	0	0	0	0	0	0	0	0	0	0	0	0	0	0	0	0	0	0	0
5786	Apolipoprotein A-II	SPELQAEAK	971.557	29.558	38.903	0	0	45.063	0	10.837	326.917	322.714	2.238	109.657	0	0	0	0	0	0	0	143.228	127.399	134.313	0	0	0	0	0	0	0	0	0	0	0	0	0	0	0	0	0	0	0	0	0	175.555	0	0	0
14635	Apolipoprotein A-II	SKEQLTPLIK	1155.6	23.577	0	0	241.178	658.389	0	25.455	0	0	0	0	0	0	0	0	0	0	0	0	0	0	0	0	0	0	0	0	0	0	0	0	0	0	0	0	0	0	0	0	0	0	0	0	0	0	0
15942	Apolipoprotein A-II	VKSPELQAEAK	1198.72	24.943	765.357	164.329	0	0	0	0	214.657	0	0	195.213	0	0	0	0	0	0	0	0	0	0	0	0	0	0	0	0	0	0	0	0	0	0	0	0	0	0	0	0	0	0	0	0	0	0	0
37559	Apolipoprotein A-II	EPcVESLVSQYFQTVTDYGK	2291.19	35.84	0	10.503	0	0	0	0	0	16.469	6.686	9.092	0	0	0	0	42.22	0	0	0	0	46.249	0	0	0	0	0	0	0	0	106.554	0	0	0	31.442	0	0	45.633	102.337	0	0	0	57.368	0	0	0	0
5943	Apolipoprotein A-IV	ISASAEELR	974.461	30.716	0	0	0	0	0	0	0	0	0	38.701	94.738	114.899	0	0	0	0	0	0	0	0	0	0	0	0	0	0	0	0	0	0	183.557	71.786	0	0	0	0	39.49	588.04	0	0	0	0	61.322	0	0
5994	Apolipoprotein A-IV	QLTPYAQR	975.582	30.769	0	0	0	0	361.186	0	0	0	0	0	0	0	0	0	0	0	0	0	0	0	0	0	0	0	0	0	0	0	0	0	0	0	0	0	0	4.828	0	0	0	0	0	0	0	0	0
6535	Apolipoprotein A-IV	LAPLAEDVR	982.556	31.884	0	0	0	0	0	0	0	0	0	0	0	0	0	0	0	0	0	0	0	0	0	0	0	0	0	0	0	0	0	0	0	0	0	0	0	10.347	0	0	0	7.18	0	0	0	0	0
11506	Apolipoprotein A-IV	VNSFFSTFK	1075.46	29.676	0	0	0	0	0	0	0	0	0	0	0	0	0	0	0	0	0	0	0	0	0	0	0	0	0	0	0	0	0	0	30.534	0	0	0	0	0	0	0	0	0	0	0	0	0	0
11935	Apolipoprotein A-IV	IDQNVEELK	1086.51	29.842	0	0	0	0	0	0	0	0	0	0	0	0	0	0	0	0	0	0	0	0	0	54.0452	0	0	0	0	0	0	5.219	0	0	0	0	0	0	0	0	14.653	0	0	0	0	0	0	0
12571	Apolipoprotein A-IV	IDQTVEELR	1101.61	31.094	0	0	0	0	0	0	0	154.639	71.238	126.147	0	298.65	0	105.211	110.464	0	0	195.913	134.092	61.046	0	0	45.086	0	0	72.981	0	0	0	13.4933	0	0	102.26	0	0	20.068	72.247	0	0	0	152.634	287.859	0	0	0
12630	Apolipoprotein A-IV	LEPYADQLR	1103.57	29.652	0	0	0	95.409	0	0	0	0	0	0	0	0	0	0	0	0	0	0	0	0	0	0	0	0	0	0	0	0	4.789	0	0	0	0	0	0	0	0	0	0	0	0	0	0	0	0
15867	Apolipoprotein A-IV	VEPYGENFNK	1195.59	33.699	0	0	0	0	0	0	0	0	0	0	0	0	0	0	0	0	0	0	0	0	0	0	0	0	0	0	0	0	0	0	0	0	0	0	0	0	0	0	0	0	0	0	0	0	0
16359	Apolipoprotein A-IV	ALVQQMEQLR	1214.6	30.985	7.956	0	0	0	0	49.88	0	13.335	0	0	0	0	0	0	0	0	0	20.591	0	0	0	0	0	0	0	0	0	0	0	0	16.317	153.897	0	0	0	0	0	0	0	0	0	0	0	0	59.302
17031	Apolipoprotein A-IV	LLPHANEVSQK	1234.58	23.799	0	11.503	0	0	0	0	0	0	0	0	0	0	0	0	0	0	0	0	0	0	0	0	0	0	0	0	0	0	0	0	0	0	0	0	0	0	0	0	0	0	0	0	47.3	0	0
19495	Apolipoprotein A-IV	DKVNSFFSTFK	1318.72	26.148	0	0	0	0	0	0	10.741	0	0	0	0	0	0	0	0	0	0	0	0	0	0	59.5335	0	0	0	0	0	0	0	0	0	0	0	127.621	0	79.394	0	0	0	0	0	0	0	0	0
19776	Apolipoprotein A-IV	VKIDQTVEELR	1328.7	25.297	45.719	0	0	0	0	1056.65	0	0	48.169	0	0	165.074	0	0	0	0	0	0	0	35.701	0	0	0	0	0	0	0	0	0	0	0	0	60.223	0	0	0	0	0	0	0	0	0	0	0	0
20245	Apolipoprotein A-IV	SLAPYAQDTQEK	1349.72	32.501	136.08	238.557	576.062	310.081	0	0	130.2	507.797	169.934	0	285.565	672.967	73.111	0	588.943	0	0	363.807	491.773	87.89	0	98.2229	433.687	0	471.695	138.636	714.302	31.362	479.277	0	258.897	592.692	341.129	335.635	0	140.155	541.319	426.214	315.504	1046.34	555.523	357.439	0	0	0
21898	Apolipoprotein A-IV	LGEVNTYAGDLQK	1406.75	32.813	0	0	1747.29	0	0	30386.3	63.083	5419.85	73.962	249.755	508.297	75.308	126.366	136.301	422.089	2933.24	223.773	211.06	270.358	83.946	212.164	0	157.992	2847.01	0	0	0	0	97.296	79.1088	163.712	888.622	238.588	292.576	201.433	279.396	472.052	246.97	246.576	409.432	318.158	178.696	377.132	200.73	224.506
22549	Apolipoprotein A-IV	KLVPFATELHER	1438.86	21.978	0	0	0	0	0	0	2.902	0	0	0	0	0	0	0	52.431	0	0	0	0	0	0	17.4082	0	0	0	0	0	0	36.063	30.2861	53.907	0	26.267	44.042	0	22.855	0	0	0	0	0	0	0	0	0
26513	Apolipoprotein A-IV	SELTQQLNALFQDK	1633.78	33.393	0	0	0	0	0	0	0	494.282	0	0	0	0	0	0	0	0	723.245	788.29	823.908	0	0	0	0	0	0	0	0	0	0	0	0	0	475.917	0	0	0	565.221	0	434.013	1368.55	909.634	800.598	0	0	0
31978	Apolipoprotein A-IV	SLAELGGHLDQQVEEFR	1927.06	29.39	14.128	103.346	0	0	0	0	170.982	0	88.944	79.286	0	0	0	0	0	0	216.199	0	0	29.893	0	0	0	0	0	119.537	0	0	13.298	0	248.807	0	320.907	299.932	0	195.035	198.59	0	340.405	0	0	0	0	0	0
33034	Apolipoprotein A-IV	ENADSLQASLRPHADELK	1992.86	23.767	0	0	0	0	0	0	4.231	0	0	92.017	306.078	0	0	0	0	0	0	0	0	0	0	0	0	0	0	0	0	0	0	0	0	0	0	0	0	0	0	56.869	0	0	0	0	71.886	0	0
34392	Apolipoprotein A-IV	SLAELGGHLDQQVEEFRR	2083.1	24.801	350.547	0	0	0	0	0	0	0	0	0	0	0	0	0	0	0	0	0	0	34.48	0	0	0	0	0	0	0	0	0	0	0	0	0	34.3263	0	0	0	0	0	0	0	0	0	0	0
1350619	Apolipoprotein A-IV	TQVNTQAEQLR	1286.57	31.21	0	0	0	0	0	0	0	1148.98	0	0	0	156.288	0	0	0	0	0	0	0	0	0	0	0	0	0	0	0	0	0	0	0	0	0	0	0	0	0	477.695	0	0	0	0	0	0	12.594
492	Apolipoprotein E	WELALGR	843.413	28.487	0	0	0	0	0	0	0	0	0	0	0	0	0	0	0	0	0	0	0	0	0	0	0	0	0	0	0	0	0	0	0	0	0	0	0	0	0	0	0	0	0	0	0	0	0
2033	Apolipoprotein E	FWDYLR	898.458	28.175	7.868	0	0	0	139.965	0	0	0	0	0	0	0	0	0	0	0	0	0	0	0	0	0	0	0	0	0	10.759	0	0	0	0	0	0	0	0	10.034	0	0	0	0	0	0	0	0	0
3665	Apolipoprotein E	QWAGLVEK	929.552	28.63	0	0	0	0	0	0	0	0	0	0	0	0	0	0	0	0	0	0	0	0	0	0	0	0	0	0	0	0	0	0	0	0	0	0	0	0	0	0	0	12.343	0	0	0	0	0
5547	Apolipoprotein E	LGPLVEQGR	967.6	29.706	39.827	27.841	0	0	0	0	15.112	0	44.478	50.58	25.595	42.205	0	135.036	0	0	0	0	55.314	0	0	0	0	0	0	0	0	13.386	0	0	13.792	0	56.269	0	0	48.53	63.469	21.145	39.448	146.61	0	63.655	0	0	112.335
9471	Apolipoprotein E	LQAEAFQAR	1032.58	30.322	0	0	822.417	0	0	0	0	194.014	32.238	125.988	145.636	77.975	386.522	0	36.16	0	0	0	0	0	141.189	0	0	192.936	0	0	0	1902.4	0	0	22.047	0	0	22.7844	0	0	116.397	0	0	489.132	0	91.649	0	148.855	238.628
13089	Apolipoprotein E	LEEQAQQIR	1113.6	30.15	0	0	0	0	0	326.316	10.948	1245.37	21.752	129.098	384.195	365.23	0	0	0	0	0	0	0	11.031	40.2665	0	0	0	0	0	0	0	0	0	183.702	0	0	0	0	0	0	44.177	0	0	0	0	224.964	0	0
17413	Apolipoprotein E	QQTEWQSGQR	1246.54	33.577	0	3.455	0	42.44	0	0	0	0	0	0	0	0	0	0	0	0	0	0	0	0	0	0	0	0	0	0	0	0	0	0	0	0	0	0	0	0	0	0	0	0	0	0	0	0	0
19354	Apolipoprotein E	AKLEEQAQQIR	1312.66	26.317	0	0	0	0	0	882.269	0	85.901	0	0	0	0	0	0	195.332	0	0	0	0	0	0	0	0	0	0	24.854	48.862	144.11	0	0	0	0	0	0	0	0	0	0	0	0	0	0	0	0	0
23661	Apolipoprotein E	AATVGSLAGQPLQER	1496.8	33.154	530.549	1476.29	0	2672.4	0	0	0	1829.63	759.459	0	2915.52	4619.3	0	4224.25	0	0	0	0	0	0	0	0	0	3846.22	0	6379.34	0	0	0	0	3313.45	5339.71	2650.61	0	0	0	3125.11	3606.75	2962.9	6605	0	2242.3	0	0	0
24499	Apolipoprotein E	SWFEPLVEDMQR	1535.79	32.953	315.946	0	0	0	0	0	0	129.509	157.334	737.436	0	0	0	1050.35	0	0	0	252.689	0	0	0	0	0	466.845	131.964	65.274	0	122.198	0	0	0	251.894	179.067	257.83	0	197.42	344.9	146.457	186.833	334.945	187.829	273.177	0	0	0
26229	Apolipoprotein E	VQAAVGTSAAPVPSDNH	1619.9	34.592	0	0	152.728	20.931	0	0	0	112.452	0	34.747	25.247	76.37	0	156.948	0	0	0	0	0	0	0	0	177.411	0	0	0	0	0	9.043	0	0	418.135	13.73	0	0	0	0	61.279	0	0	123.695	27.571	70.451	0	0
26804	Apolipoprotein E	GEVQAMLGQSTEELR	1646.72	32.685	0	0	0	0	0	0	0	0	0	0	0	0	0	0	0	0	0	0	0	0	0	0	0	0	0	0	12.041	0	0	0	0	0	0	0	0	0	0	0	0	0	0	0	0	0	0
28443	Apolipoprotein E	SELEEQLTPVAEETR	1729.8	33.672	0	0	0	0	0	0	0	0	0	0	0	0	0	0	0	0	0	0	0	0	0	0	0	0	0	0	358.218	0	0	0	0	0	0	0	0	0	0	0	0	0	0	0	0	0	0
29291	Apolipoprotein E	LKSWFEPLVEDMQR	1776.95	28.266	0	0	0	0	0	0	0	0	0	0	0	66.805	0	0	0	0	0	0	0	0	0	0	0	0	0	0	0	0	0	0	0	0	0	0	0	0	0	0	0	0	0	0	0	0	0
34507	Apolipoprotein E	AYKSELEEQLTPVAEETR	2092.17	29.94	30.44	31.902	0	0	0	0	9.154	187.849	0	28.062	0	0	0	0	0	0	0	0	467.341	0	0	0	0	0	0	0	0	0	0	0	0	0	0	0	0	0	0	1911.19	0	0	1016.05	0	782.534	0	0
1349073	Apolipoprotein E	LAVYQAGAR	947.456	28.577	0	0	0	0	0	0	0	0	0	33.027	145.006	135.646	0	0	0	0	0	0	0	0	0	0	0	0	0	0	0	0	0	0	20.161	104.041	0	0	0	0	0	32.948	0	0	0	0	44.128	0	0
3783	Beta-2-glycoprotein 1	TDASDVKPc	933.44	28.568	0	0	0	22.168	0	153.553	0	27.344	0	0	0	0	0	17.932	0	0	0	0	0	0	0	0	0	0	0	0	0	0	0	0	0	0	0	0	0	0	0	0	0	0	0	0	0	0	0
8666	Beta-2-glycoprotein 1	ATVVYQGER	1021.51	32.537	0	0	0	0	0	0	0	0	0	0	0	0	0	0	0	0	0	0	0	0	0	12.567	0	0	0	0	0	0	0	0	0	0	0	0	0	9.957	0	0	0	0	0	0	0	0	0
12619	Beta-2-glycoprotein 1	EHSSLAFWK	1103.47	26.891	0	0	0	0	0	0	0	0	0	0	0	0	0	0	0	0	0	14.484	0	5.24	0	0	0	0	0	0	0	0	0	0	0	0	0	0	0	0	0	0	0	0	0	0	0	0	0
5329	Beta-crystallin B2	GLQYLLEK	962.561	27.557	0	0	0	0	0	0	0	29.102	0	0	0	0	0	0	0	0	0	0	0	0	0	0	0	0	0	0	0	0	0	0	0	0	0	0	0	0	0	0	0	0	0	0	0	0	0
8722	Beta-crystallin B2	WDSWTSSR	1023.5	29.352	0	0	0	0	0	0	0	0	0	0	0	0	0	0	28.911	0	0	0	0	0	0	0	0	0	0	0	0	0	0	0	0	0	0	0	0	0	0	0	0	0	0	0	0	0	0
16436	Beta-crystallin B2	TDSLSSLRPIK	1215.66	25.271	0	0	0	0	0	0	0	0	0	0	0	0	0	0	0	0	0	0	0	0	0	0	0	0	0	88.019	134.774	178.656	0	0	0	0	0	0	0	0	0	0	0	0	0	0	0	0	0
21937	Beta-crystallin B2	IILYENPNFTGK	1407.72	32.559	0	0	0	0	0	0	0	0	0	0	0	0	0	0	1146.84	0	0	653.167	913.119	0	0	0	0	616.642	0	0	0	0	0	0	0	0	509.537	0	0	0	0	596.233	0	0	0	848.653	0	0	0
28320	Beta-crystallin B2	DSSDFGAPHPQVQSVR	1725.9	29.615	0	0	0	34.725	0	0	0	0	0	0	0	0	0	0	239.368	0	0	0	0	0	0	0	0	0	0	0	0	0	0	0	0	0	0	0	0	0	0	0	0	0	0	0	0	0	0
28964	Beta-crystallin B2	VQSGTWVGYQYPGYR	1759.95	34.321	0	0	0	146.928	0	0	0	0	0	0	0	0	70.571	0	0	0	0	36.71	0	0	0	0	0	0	0	0	0	0	0	0	0	0	0	0	0	0	0	0	0	0	0	0	0	0	0
35774	Beta-crystallin B2	GDYKDSSDFGAPHPQVQSVR	2189.11	26.361	0	0	0	0	0	0	0	0	0	0	0	0	0	0	22.717	0	0	0	0	0	0	0	0	0	0	0	0	0	0	0	8.579	0	0	0	0	0	0	0	0	0	0	0	0	0	0
36412	Beta-crystallin B2	MEIIDDDVPSFHAHGYQEK	2230.15	28.314	0	0	0	0	0	0	0	0	0	0	0	0	0	0	0	0	0	0	0	0	0	0	0	0	0	0	0	0	0	0	0	0	0	0	0	0	0	0	0	0	0	0	0	0	0
38672	Beta-crystallin B2	KMEIIDDDVPSFHAHGYQEK	2358.17	26.246	0	0	0	0	0	0	8.627	0	0	0	0	0	0	0	0	0	0	0	258.765	0	0	0	0	0	0	0	0	0	0	0	0	0	0	0	0	0	0	94.487	0	0	0	0	0	0	0
5022	Calmodulin-regulated spectrin-associated protein 3	RFTQIPAK	959.591	20.536	0	2.368	0	0	0	0	0	0	0	0	0	0	0	0	0	0	0	0	0	0	0	0	0	0	0	0	0	0	0	0	0	0	0	0	0	0	0	0	0	0	0	0	0	0	0
22363	Calmodulin-regulated spectrin-associated protein 3	LQEKTEQEAAQR	1429.81	24.052	0	36.503	0	0	0	0	5.085	0	6.809	0	0	0	0	0	0	0	0	0	0	0	0	0	0	0	0	0	0	0	0	0	0	1532.27	0	0	0	0	1026.82	0	0	0	0	0	0	0	0
2139	Cartilage glycoprotein-39	FPLTNAIK	902.474	30.331	0	2.914	0	0	0	0	18.416	0	19.279	0	0	0	3.353	0	0	0	0	0	0	8.522	0	0	0	0	0	0	0	0	14.067	0	9.973	0	7.004	0	0	25.203	11.731	0	0	63.924	0	0	0	0	16.535
16181	Cartilage glycoprotein-39	GTTGHHSPLFR	1208.64	20.651	8.556	0	0	0	0	0	0	0	0	0	0	0	0	0	0	0	0	0	0	0	0	0	0	0	0	0	0	0	0	0	0	0	0	0	0	0	0	0	0	0	0	0	0	0	0
16447	Cartilage glycoprotein-39	ILGQQVPYATK	1216.61	31.487	17.154	35.45	0	110.092	0	0	96.906	17.367	0	0	0	0	0	0	0	0	0	0	26.48	0	0	0	0	0	0	0	26.509	0	0	0	4.572	0	0	0	0	0	0	0	0	0	23.877	0	0	0	0
1186	Cathepsin D	QVFGEATK	878.425	28.078	0	20.683	0	0	0	19.987	0	0	0	0	0	0	0	0	0	0	0	0	0	0	0	0	0	0	0	0	0	0	0	0	0	0	0	0	0	0	0	0	0	0	0	0	0	0	0
9778	Cathepsin D	VSTLPAITLK	1041.57	30.79	0	5.523	0	0	0	0	84.342	134.475	87.513	61.826	108.139	71.383	0	69.687	0	0	69.1927	160.44	120.553	59.115	0	24.5746	0	0	70.2021	0	28.021	0	0	0	35.621	0	37.462	24.4585	65.0298	62.227	0	0	0	0	65.945	113.642	106.583	47.9611	123.177
9924	Cathepsin D	QPGITFIAAK	1044.61	30.224	36.163	548.256	1797.07	0	12709.1	0	187.305	752.144	91.293	474.263	898.583	1100.84	0	1294.39	2357.36	30341.5	204.509	209.124	339.719	74.906	0	0	1090.93	17376.4	535.175	0	0	1182.07	543.797	0	0	476.165	107.371	0	0	96.956	93.565	93.109	59.032	341.939	492.943	270.662	1624.68	371.299	694.064
17193	Cathepsin D	FDGILGMAYPR	1238.65	31.653	0	0	0	53.703	0	0	60.854	14.424	0	0	0	54.009	0	0	0	0	0	45.299	0	0	0	0	0	0	58.0509	0	0	0	12.423	0	0	0	0	0	0	98.321	99.867	43.452	0	92.074	112.669	23.571	0	0	307.269
24470	Cathepsin D	TMSEVGGSVEDLIAK	1534.68	33.183	0	16.28	0	0	0	0	59.091	0	446.713	0	0	0	0	0	5719.38	2191.23	0	432.81	0	224.366	0	0	3545.14	0	4011.27	812.831	1772.72	0	4465.61	32.6465	0	0	630.844	315.073	0	568.813	707.399	0	543.88	0	1071.19	327.842	1405.07	0	0
29434	Cathepsin D	DPDAQPGGELMLGGTDSK	1786.93	35.17	7.62	0	0	0	0	0	15.002	24.995	22.119	22.998	0	0	0	0	39.659	0	0	0	137.065	38.986	0	0	0	0	0	0	0	0	0	0	8.422	67.012	45.062	0	0	65.953	87.818	152.533	15.235	0	29.878	92.951	0	0	51.991
1351535	Cathepsin D	ISVNNVLPVFDNLMQQK	1957.92	34.808	0	0	0	0	0	35.273	0	0	0	0	0	0	0	0	0	0	0	0	0	2.983	0	70.3581	0	0	0	16.804	0	0	0	0	0	0	0	0	0	0	0	0	0	0	0	0	0	0	0
1604	Ceruloplasmin	YTVNQcR	881.374	28.03	0	0	0	0	0	11.568	0	0	0	24.41	95.6	125.444	0	0	0	0	0	0	0	0	0	0	0	0	0	0	0	0	0	0	0	34.547	0	0	0	0	0	5.057	0	0	0	0	27.796	0	0
8391	Ceruloplasmin	QYTDSTFR	1016.43	29.159	0	0	0	0	0	0	0	0	0	0	65.514	53.868	557.92	0	0	0	0	0	0	0	0	132.69	0	0	0	0	0	0	0	0	0	0	0	0	0	0	0	0	0	0	0	0	0	0	0
15730	Ceruloplasmin	DIFTGLIGPMK	1190.59	28.404	12.338	0	0	0	0	0	0	0	0	0	0	0	0	0	0	0	0	0	0	0	0	0	0	0	0	0	0	0	0	0	0	0	0	0	0	0	0	0	0	0	0	0	0	0	0
20580	Ceruloplasmin	AETGDKVYVHLK	1358.78	22.106	30.825	0	0	0	0	0	0	0	0	0	0	0	0	0	96.612	0	0	0	0	8.267	0	0	0	0	0	54.544	0	0	0	0	0	0	0	0	0	0	0	0	0	0	0	0	0	0	0
21050	Ceruloplasmin	GAYPLSIEPIGVR	1370.65	32.221	0	0	0	0	0	0	1656.92	0	1648.35	3101.98	1305.33	2577.7	1679.9	2827.12	12752.8	8891.08	0	3030.12	2458.49	1922.43	2432.86	1805.76	13369.9	2597.2	12102.2	2493.59	0	3968.26	11314.7	8485.49	1925.46	0	1399.3	2895.5	3631.89	3264.6	2317.4	1860.5	1336.38	0	2609.17	1296.97	3654.26	3242.16	3559.36
22000	Ceruloplasmin	DIASGLIGPLIIcK	1410.79	33.171	0	0	0	0	0	0	0	0	0	0	0	0	517.183	0	0	0	0	0	0	0	0	0	0	0	0	0	0	0	0	0	6.547	0	0	0	0	0	0	0	0	0	0	0	0	0	0
22009	Ceruloplasmin	EVGPTNADPVcLAK	1411.64	32.368	0	0	0	0	0	0	0	0	0	24.112	125.37	0	0	0	0	0	0	0	0	0	0	0	0	0	0	0	0	0	0	0	0	0	0	0	0	0	0	0	0	0	0	0	0	0	0
22385	Ceruloplasmin	QSEDSTFYLGER	1430.53	31.728	0	1512.61	0	111.436	0	0	0	0	0	59.443	0	0	0	0	142.625	0	0	0	0	0	0	0	0	0	0	26.056	0	0	0	0	0	0	0	0	0	0	0	0	0	0	0	0	0	0	0
25160	Ceruloplasmin	VNKDDEEFIESNK	1565.8	27.014	429.695	410.088	0	0	0	0	77.16	9.034	11.78	100.95	0	0	0	16.421	0	0	0	26.272	0	5.182	0	127.672	0	0	0	0	0	0	0	0	0	0	0	128.259	0	15.787	0	0	0	14.081	0	0	0	0	0
25533	Ceruloplasmin	RQSEDSTFYLGER	1586.8	26.862	169.979	112.785	0	0	0	0	0	0	0	0	0	0	0	0	0	0	0	0	0	0	0	0	0	0	0	0	0	0	0	0	0	0	0	0	0	0	0	0	0	0	0	0	0	0	0
31692	Ceruloplasmin	TTIEKPVWLGFLGPIIK	1911.12	29.186	0	0	0	0	0	0	0	0	0	0	0	0	0	0	0	0	0	0	0	0	0	125.607	0	0	0	0	0	0	0	0	0	0	0	0	0	0	0	0	0	0	0	0	0	0	0
35518	Ceruloplasmin	LISVDTEHSNIYLQNGPDR	2170.16	30.422	26.438	0	0	0	0	0	2.283	20.23	6.347	0	0	0	22.705	0	0	0	29.8758	66.616	118.382	0	0	10.8696	144.049	0	113.819	92.515	0	0	0	0	76.846	175.139	72.766	57.9363	0	0	78.916	141.063	175.807	0	0	30.911	259.44	0	0
36855	Ceruloplasmin	KAEEEHLGILGPQLHADVGDK	2255.28	23.588	386.745	469.086	0	365.207	0	95.667	75.94	23.659	267.075	149.444	112.508	0	206.032	345.711	284.701	0	50.5895	52.17	35.464	130.901	123.759	0	129.162	0	418.667	141.023	0	0	370.831	270.852	134.073	0	92.366	429.346	53.1145	164.282	0	0	222.057	0	270.6	89.603	0	153.238	579.852
37659	Ceruloplasmin	KLISVDTEHSNIYLQNGPDR	2298.24	26.389	74.307	66.428	0	0	0	0	41.797	0	35.02	28.927	0	0	24.016	0	0	0	0	74.205	52.985	38.112	0	0	0	0	0	0	0	0	20.372	0	86.895	0	68.529	83.7136	0	81.271	0	179.747	77.629	23.42	52.065	15.77	0	0	0
38542	Ceruloplasmin	MYYSAVDPTKDIFTGLIGPMK	2346.28	31.331	78.599	0	0	0	0	0	75.03	0	83.565	0	0	0	0	0	0	0	0	54.47	0	90.815	50.6183	184.622	0	0	0	15.015	0	0	0	0	37.129	0	49.878	200.055	0	130.667	11.935	17.308	0	0	0	0	0	0	0
40179	Ceruloplasmin	MFTTAPDQVDKEDEDFQESNK	2473.24	31.705	606.063	306.233	51.879	0	0	0	97.046	0	210.482	96.072	69.266	0	86.594	316.045	271.739	0	60.9717	82.116	74.892	151.533	96.5225	154.269	0	0	90.7043	80.198	72.579	0	200.56	0	31.067	37.688	165.95	273.744	104.724	356.936	75.101	216.979	0	70.142	86.48	129.807	0	102.968	221.175
40369	Ceruloplasmin	GPEEEHLGILGPVIWAEVGDTIR	2486.39	31.428	0	66.102	0	0	0	0	0	243.936	190.617	125.986	0	0	51.141	44.505	0	0	0	548.246	98.288	0	0	0	34.6	0	0	25.317	75.558	0	94.62	0	247.177	0	272.842	0	84.7726	0	341.422	92.453	0	0	59.129	390.008	0	0	79.352
42624	Ceruloplasmin	GVYSSDVFDIFPGTYQTLEMFPR	2668.4	36.28	2.5	0	0	0	0	0	0	0	195.929	0	0	0	21.18	0	0	0	148.364	305.226	0	179.775	139.452	183.709	0	0	0	89.824	13.828	0	68.013	64.125	158.886	0	194.71	93.8186	0	0	210.776	0	203.459	26.859	0	251.964	0	0	0
1350415	Ceruloplasmin	IYHSHIDAPK	1179.57	20.55	0	0	0	0	0	0	0	0	0	0	0	0	0	0	0	0	0	0	0	0	0	0	0	0	0	0	0	0	0	0	0	0	0	0	0	0	0	0	0	0	0	0	0	0	0
2283	Clusterin	KYNELLK	906.562	22.347	82.771	69.32	20.627	145.75	240.563	0	50.467	40.399	22.504	63.945	0	0	41.501	85.89	71.684	0	0	69.737	27.353	44.228	0	0	0	313.053	0	26.813	36.033	0	0	0	46.699	0	69.724	0	0	34.052	0	0	0	108.654	52.884	59.389	0	0	87.049
4794	Clusterin	FMETVAEK	953.441	27.468	13.26	20.57	95.131	19.496	0	0	0	0	0	106.48	88.76	83.26	0	0	0	0	0	0	0	0	0	0	0	0	0	0	0	0	0	0	0	0	0	0	0	0	0	0	0	0	0	0	0	0	0
11325	Clusterin	EIQNAVNGVK	1070.53	29.947	0	0	0	0	0	0	0	0	0	0	0	0	0	0	0	0	0	0	0	0	0	0	0	0	0	0	0	0	0	0	0	0	0	0	0	0	0	0	0	0	0	0	0	0	0
13200	Clusterin	TLLSNLEEAK	1116.63	30.606	0	210.036	0	0	0	0	167.804	468.65	182.299	239.162	122.603	0	0	473.059	0	0	322.793	488.542	0	141.493	0	102.749	0	767.131	0	0	0	0	7.257	91.2633	0	0	473.809	141.28	0	167.037	554.799	0	452.201	0	527.602	649.385	0	0	0
17390	Clusterin	KTLLSNLEEAK	1244.75	24.976	285.909	324.864	0	565.066	0	0	116.385	0	358.754	236.312	0	0	0	728.868	247.829	796.485	154.439	85.928	0	131.963	0	104.21	0	3189.14	461.333	144.06	353.503	0	174.733	64.4608	149.286	0	128.09	301.571	293.642	214.61	0	0	190.329	0	463.647	89.838	0	233.17	694.618
18706	Clusterin	ELDESLQVAER	1287.66	30.376	0	0	0	0	0	0	6.537	15.837	0	0	0	0	0	0	0	0	0	0	0	0	0	0	0	0	0	0	0	0	0	0	0	0	0	0	0	0	0	0	0	0	0	0	0	0	0
21501	Clusterin	ASSIIDELFQDR	1392.72	34.471	0	0	0	0	0	0	0	0	0	0	0	0	0	0	0	0	0	0	0	0	0	0	0	0	0	0	0	0	0	0	0	0	0	0	0	1.437	0	0	0	0	0	0	0	0	0
27856	Clusterin	EILSVDcSTNNPSQAK	1703.89	34.126	0	470.363	230.864	37.772	0	0	1.688	0	0	0	0	0	0	0	0	0	0	0	0	0	0	0	0	0	0	0	0	0	0	0	0	0	0	0	0	0	0	0	0	0	0	84.145	78.501	0	0
30974	Clusterin	QQTHMLDVMQDHFSR	1871.94	24.091	490.597	262.24	0	0	0	0	133.748	68.079	348.067	242.076	44.997	0	0	160.642	97.449	0	127.811	0	103.341	80.884	118.092	62.1349	0	387.301	0	118.87	264.181	0	0	0	0	0	0	325.338	139.428	276.231	0	78.052	0	118.696	126.257	111.239	0	0	0
30991	Clusterin	LFDSDPITVTVPVEVSR	1873.03	34.733	2430.76	3886.41	2571.68	6284.25	0	0	3628	2133.4	2443.85	5276.85	2152.38	3787.71	2739.07	5515.28	6108.42	0	5283.5	5085.22	5941.29	3948.93	5982.78	7846.4	4396.66	5440.44	9466.89	8174.21	2973.22	2230.45	4290.99	8334.08	3867.21	4560.98	12347.8	7865.41	6919.16	5675.62	11517.2	5961.34	5408.93	9381.86	3151.56	5771.05	4434.59	7997.52	5633.46
33119	Clusterin	EPQDTYHYLPFSLPHR	1999.07	25.285	0	0	0	0	0	0	0	18.373	69.998	34.515	0	0	0	58.119	0	0	0	60.868	118.924	72.594	0	0	0	338.09	0	0	0	0	0	0	57.559	0	50.782	64.395	0	145.534	0	97.876	59.776	39.659	66.298	64.785	0	0	0
37937	Clusterin	VTTVASHTSDSDVPSGVTEVVVK	2313.13	30.647	0	0	36.809	0	0	0	0	53.894	0	0	0	0	0	0	0	0	0	119.862	0	31.783	0	0	0	0	0	0	0	23.539	0	0	172.332	0	0	0	0	0	0	0	0	0	0	0	0	0	83.857
20132	Collagen alpha-1(I) chain	GFpGLpGPSGEpGK	1343.55	31.808	1.199	0	0	0	0	0	0	0	0	0	0	0	0	0	0	0	0	9.858	0	0	0	0	0	0	0	0	0	0	0	0	0	0	0	0	0	0	0	0	0	0	0	0	0	0	0
20608	Collagen alpha-1(I) chain	GFpGLpGpSGEpGK	1359.57	31.607	0	0	0	0	0	0	0	0	0	0	0	0	46.724	0	0	0	0	0	0	0	0	0	0	0	0	0	0	0	0	0	0	0	0	0	0	0	0	0	0	0	0	0	0	0	0
28824	Collagen alpha-1(I) chain	GARGEpGpTGLPGpPGER	1748.74	26.871	0	0	0	0	0	0	0	0	0	0	0	0	0	0	0	0	0	0	46.113	0	0	0	0	0	0	0	0	0	0	0	0	0	0	0	0	0	0	58.892	0	56.947	45.452	0	0	0	0
31747	Collagen alpha-1(I) chain	GESGpSGpAGpTGARGApGDR	1913.94	28.321	88.472	143.388	0	0	0	0	13.719	0	0	0	0	0	65.4	0	0	0	40.6855	86.74	114.985	0	0	0	0	0	0	0	0	0	0	0	58.398	98.443	35.969	0	73.5134	0	0	76.804	60.169	0	0	154.474	0	0	28.228
1350686	Collagen alpha-1(I) chain	GFpGLpGPSGEPGK	1327.55	31.285	0	50.808	0	0	0	0	0	0	0	0	0	0	0	0	0	0	0	0	0	0	0	0	0	0	0	0	0	105.451	0	0	0	0	0	0	0	0	0	0	0	0	0	0	0	0	0
2419	Collagen alpha-1(II) chain	GIQGPQGPR	908.519	28.905	0	0	0	0	0	619.473	0	947.865	0	0	0	0	0	0	0	0	0	66.313	53.061	0	0	0	0	0	0	0	0	0	0	0	12.145	60.699	33.75	0	0	0	0	37.016	0	14.651	0	0	0	0	0
2479	Collagen alpha-1(II) chain	GIVGLpGQR	911.498	28.74	0	0	13.74	0	0	0	0	0	0	12.074	62.285	0	0	0	0	0	0	0	0	0	0	0	0	0	0	0	0	0	0	0	0	0	0	0	0	0	0	0	0	0	0	0	0	0	0
4568	Collagen alpha-1(II) chain	GPPGPVGPSGK	948.54	29.561	0	0	0	0	0	0	0	458.095	0	0	0	0	0	0	0	0	0	0	0	0	0	0	0	0	0	0	0	30.174	0	0	6.509	0	24.797	0	0	0	14.379	11.981	0	0	0	0	0	0	0
5435	Collagen alpha-1(II) chain	GPpGPVGPSGK	964.511	29.296	0	0	0	0	0	5573.53	0	1834.48	0	0	0	0	143.212	269.803	0	0	0	0	0	0	0	0	0	0	0	148.884	0	164.148	0	0	0	0	0	0	0	0	0	0	0	83.406	0	0	0	0	0
11904	Collagen alpha-1(II) chain	GAAGIAGpKGDR	1084.62	25.999	0	0	0	0	0	993.42	0	126.424	0	0	0	0	0	0	0	0	0	0	0	0	0	0	0	0	0	0	0	0	0	0	0	0	0	0	0	0	0	0	0	0	0	0	0	0	0
14167	Collagen alpha-1(II) chain	GSpGAQGLQGPR	1139.61	31.446	62.947	21.433	1263	314.754	0	15403.2	5.673	2892.53	4.67	0	0	0	0	0	0	1232.41	0	0	0	0	0	0	0	1196.6	0	0	0	0	0	0	0	0	0	0	0	5.888	0	0	0	0	0	0	0	0	0
14767	Collagen alpha-1(II) chain	GFpGQDGLAGPK	1158.51	32.242	0	5.743	0	0	0	0	0	0	0	0	0	0	0	0	0	0	0	0	0	0	0	0	0	0	0	0	0	0	0	0	0	0	0	0	0	0	0	0	0	0	0	0	0	0	0
18883	Collagen alpha-1(II) chain	GEVGPpGPAGSAGAR	1294.61	34.635	0	0	0	0	0	37.783	0	0	0	0	0	0	0	0	0	0	0	0	0	0	0	0	0	0	0	0	0	0	0	0	0	0	0	0	0	0	0	0	0	0	0	0	0	0	0
19692	Collagen alpha-1(II) chain	GLTGRpGDAGPQGK	1325.72	25.692	0	0	0	0	0	11359.6	0	0	0	0	0	0	0	0	0	1684.59	0	0	0	0	0	0	0	0	0	0	0	0	0	0	0	0	0	0	0	0	0	0	0	0	0	0	0	0	0
21194	Collagen alpha-1(II) chain	GppGPQGATGPLGpK	1377.73	32.836	0	0	0	0	0	598.278	0	1049.07	0	0	0	0	0	0	0	0	0	0	111.623	0	0	0	0	0	0	0	0	0	0	964.876	0	0	63.942	0	0	31.022	0	0	35.29	0	0	0	0	0	0
21894	Collagen alpha-1(II) chain	GEpGGVGPIGPpGER	1406.68	30.644	0	0	0	0	0	0	0	0	0	0	0	0	0	0	0	0	156.624	0	0	0	0	0	0	0	0	0	0	0	0	0	0	0	0	175.484	0	0	0	0	0	0	0	0	0	0	0
22104	Collagen alpha-1(II) chain	GPpGPQGPAGEQGPR	1416.7	32.821	0	0	0	0	0	0	0	0	0	0	0	0	0	0	0	0	0	0	22.519	0	0	0	0	0	0	0	0	273.522	0	0	0	0	0	0	67.6192	0	915.696	23.641	0	0	0	0	0	0	0
22217	Collagen alpha-1(II) chain	GEpGGVGPIGppGER	1422.75	32.711	0	0	0	0	0	11646.1	203.662	5521.91	716.925	453.344	1032.44	1006.44	747.675	601.552	2496.52	822.396	843.503	125.04	1749.27	0	1557.68	0	0	2231.12	3014.57	0	1498.29	0	1354.67	0	640.311	1334.12	1130.16	765.137	698.038	675.956	903.88	0	1739.26	0	1830.78	467.384	0	1111.61	2846.06
23573	Collagen alpha-1(II) chain	AGEpGLQGPAGPpGEK	1492.68	33.307	0	0	0	0	0	0	0	0	0	0	0	0	0	0	0	0	0	0	0	0	0	0	0	0	0	0	0	0	0	0	0	0	53.07	0	0	0	0	0	0	0	201.179	94.919	0	0	0
23714	Collagen alpha-1(II) chain	GAQGPpGATGFpGAAGR	1499.77	33.039	0	0	0	0	0	13931.7	0	4082.76	0	0	0	0	0	0	0	0	0	0	0	0	0	0	0	1728.57	0	0	0	0	0	0	0	0	0	0	0	0	0	0	0	0	0	0	0	0	0
23752	Collagen alpha-1(II) chain	DGANGIpGPIGpPGPR	1502.64	32.514	62.132	193.541	0	0	0	0	0	0	0	0	0	0	0	0	0	0	0	0	0	0	0	0	0	0	0	0	0	0	0	0	0	0	0	0	0	0	0	0	0	0	0	0	0	0	0
23917	Collagen alpha-1(II) chain	AGEpGLQGPAGppGEK	1508.73	32.778	0	0	0	0	0	711.718	0	1299.18	0	0	0	0	0	0	0	0	0	0	0	0	0	0	0	0	0	0	0	0	0	0	0	0	0	0	0	94.138	0	0	0	0	0	0	0	0	0
24171	Collagen alpha-1(II) chain	DGANGIpGPIGppGPR	1518.8	33.794	0	0	94.89	190.09	0	28.876	0	1800.42	0	30.99	0	0	0	0	57.569	1341.89	0	528.654	0	257.522	0	0	118.862	823.383	0	0	7139.74	0	0	0	0	716.259	0	0	0	510.722	0	0	0	0	0	0	0	0	24.611
25174	Collagen alpha-1(II) chain	GEAGAQGPMGPSGPAGAR	1566.68	33.018	0	0	0	0	0	0	0	0	0	0	548.756	0	0	0	0	0	0	0	0	0	0	0	0	0	0	18.415	96.929	0	0	0	0	0	0	0	239.729	0	0	0	0	0	0	0	0	0	0
25472	Collagen alpha-1(II) chain	GEAGAQGPmGPSGPAGAR	1582.76	33.289	76.94	28.544	236.261	0	0	0	13.667	6078.62	0	0	0	0	0	0	0	0	0	0	43.392	23.621	0	0	0	0	0	0	0	0	0	0	0	0	0	0	0	49.326	0	272.99	0	0	0	0	0	0	0
25486	Collagen alpha-1(II) chain	GSAGApGIAGApGFpGPR	1583.81	33.033	0	0	0	91.378	0	0	13.646	312.614	92.336	0	0	0	0	0	0	0	0	119.006	318.527	0	0	0	0	0	0	0	31.356	0	0	0	93.61	410.541	0	0	0	46.573	0	0	0	816.287	0	154.472	0	0	0
26238	Collagen alpha-1(II) chain	GLTGPIGPpGpAGANGEK	1620.81	33.231	0	0	0	0	0	0	0	272.336	0	0	0	0	0	0	0	0	0	0	0	0	0	50.8684	0	0	0	142.572	0	0	0	0	0	0	0	0	0	0	0	0	0	0	0	0	0	0	0
27417	Collagen alpha-1(II) chain	DGETGAAGPpGPAGPAGER	1678.86	34.236	0	0	0	0	0	6905.45	0	3896.38	46.134	14.125	0	0	0	0	13.65	0	0	145.069	570.359	0	0	0	0	0	0	146.914	0	15.425	0	84.6849	224.984	190.558	214.838	12.6338	0	0	257.206	864.075	251.643	0	390.518	178.133	0	0	0
27667	Collagen alpha-1(II) chain	DGETGAAGppGPAGPAGER	1694.74	33.574	0	0	0	0	0	0	0	0	0	0	0	0	0	0	0	0	0	0	0	0	0	0	0	0	0	0	0	0	0	0	0	0	0	0	0	0	0	0	0	0	0	0	0	0	0
28264	Collagen alpha-1(II) chain	GANGDpGRpGEPGLpGAR	1721.87	27.531	0	0	0	51.016	0	0	0	0	0	109.046	0	0	36.32	82.455	107.008	0	0	0	0	0	0	22.3125	506.649	0	0	0	0	0	52.495	0	56.079	1070.11	18.685	30.2975	0	27.101	0	15.16	43.264	0	39.973	0	0	0	90.387
28602	Collagen alpha-1(II) chain	GANGDpGRpGEpGLpGAR	1737.85	27.444	0	0	0	0	0	131.966	0	0	0	0	0	0	0	0	0	0	0	0	0	0	0	0	0	0	0	0	0	0	0	0	114.943	0	0	0	0	0	0	0	0	0	0	0	0	0	0
29560	Collagen alpha-1(II) chain	GEPGpAGPQGApGPAGEEGK	1790.88	34.424	0	0	0	0	0	37.612	11.771	0	98.776	83.308	264.634	427.891	784.428	0	594.192	831.518	82.6554	86.615	265.063	0	141.74	0	0	3684.79	0	0	0	27458.2	0	0	27.87	147.647	79.064	0	0	40.191	153.616	177.59	0	1039	0	205.847	0	369.671	339.176
29935	Collagen alpha-1(II) chain	GPpGPVGPpGLTGPAGEpGR	1813.97	34.365	0	0	0	0	0	11277	20.099	4185.37	0	0	0	0	0	0	0	0	0	0	0	0	0	0	0	650.414	0	0	0	0	0	0	0	0	0	0	0	38.528	0	0	0	0	0	0	0	0	0
30190	Collagen alpha-1(II) chain	GppGPVGPpGLTGPAGEpGR	1829.97	34.446	0	0	53.61	0	0	7916.69	0	4046.17	47.726	27.116	0	0	0	0	0	0	0	0	0	0	0	0	0	0	0	0	0	0	0	0	0	0	0	0	0	0	0	0	0	0	0	0	264.713	0	0
31068	Collagen alpha-1(II) chain	GPpGPpGKpGDDGEAGKpGK	1877.95	24.353	0	0	0	0	0	7249.86	0	942.743	0	0	0	0	0	0	0	0	0	0	0	0	0	0	0	656.584	0	0	0	0	0	0	0	0	0	0	0	0	0	0	0	0	0	0	0	0	0
33542	Collagen alpha-1(II) chain	QGDRGEAGAQGPMGPSGPAGAR	2023.07	29.765	0	0	0	0	0	1575.8	0	853.425	0	0	0	0	0	0	0	0	0	0	0	0	0	0	0	0	0	0	0	0	0	0	0	0	0	0	0	0	0	0	0	0	0	0	0	0	0
33794	Collagen alpha-1(II) chain	QGDRGEAGAQGPmGPSGPAGAR	2039.04	30.294	0	0	0	0	0	297.507	0	0	0	0	0	0	0	0	0	0	0	0	0	0	0	0	0	0	0	0	0	0	0	0	0	0	0	0	0	0	0	0	0	0	0	0	0	0	0
34085	Collagen alpha-1(II) chain	VGPSGApGEDGRPGppGPQGAR	2060.13	29.975	0	399.961	141.524	0	0	3818.46	597.347	360.7	0	0	1355.65	0	0	0	970.75	0	0	0	4241.92	0	0	0	0	0	0	0	0	29.342	0	0	0	1041.72	351.437	0	0	1125.6	0	5284.23	1418.44	0	2797.03	0	2978.01	0	0
35228	Collagen alpha-1(II) chain	GLpGKDGETGAAGPpGPAGPAGER	2147.18	30.397	0	0	0	0	0	0	118.883	0	0	0	0	0	0	0	0	0	0	49.059	0	49.805	0	0	0	0	0	0	0	0	0	0	0	0	0	0	0	0	0	0	0	0	0	37.914	0	0	0
35437	Collagen alpha-1(II) chain	GLpGKDGETGAAGppGPAGPAGER	2163.1	30.437	0	0	0	0	0	152.403	0	0	0	0	0	0	0	0	0	0	0	0	0	0	0	0	0	0	0	0	0	0	0	0	0	0	0	0	0	0	0	0	0	0	0	0	0	0	0
36000	Collagen alpha-1(II) chain	GETGAVGApGApGPpGSpGPAGPTGK	2204.15	35.953	0	0	0	0	0	14493.3	0	4673.23	0	18.126	0	0	0	0	19.594	0	0	26.608	110.327	5.856	0	0	0	560.696	0	0	0	0	0	0	0	158.03	0	0	0	29.322	0	75.517	0	0	0	0	0	0	0
36475	Collagen alpha-1(II) chain	GEpGDDGPSGAEGPpGPQGLAGQR	2234.12	35.482	0	102.322	122.196	0	0	562.114	81.061	1404.57	62.588	0	17.025	0	0	181.451	115.051	0	0	82.311	247.85	80.71	0	0	379.855	0	0	0	0	0	547.873	231.943	61.441	154.788	194.611	0	0	161.871	377.686	110.047	14.702	601.535	282.573	25.074	0	0	123.929
41027	Collagen alpha-1(II) chain	GDRGETGAVGApGApGPpGSpGPAGPTGK	2532.33	31.621	0	0	0	0	0	0	0	0	0	0	0	0	0	0	0	0	0	0	0	0	0	0	0	0	0	0	0	0	0	0	0	0	0	0	0	0	0	12.956	0	0	0	0	0	0	0
43198	Collagen alpha-1(II) chain	GFTGLQGLpGppGPSGDQGASGPAGPSGPR	2720.44	37.143	0	0	0	0	0	45751.4	0	4824.91	0	0	0	0	0	0	70.037	0	0	12.479	0	0	0	0	0	0	0	0	0	0	0	0	0	326.185	0	0	0	2.207	0	0	0	0	0	0	0	0	0
43247	Collagen alpha-1(II) chain	QGApGASGDRGPPGpVGpPGLTGpAGEPGR	2726.47	32.628	0	0	0	0	0	259.609	0	0	0	0	0	0	0	0	0	0	0	0	0	0	0	0	0	0	0	0	0	0	0	0	0	0	0	0	0	0	0	0	0	0	0	0	0	0	0
16547	Collagen alpha-1(III) chain	GQpGVmGFPGpK	1218.56	30.897	0	0	0	0	0	222.16	8.478	0	0	0	0	0	0	0	0	0	0	0	0	0	0	0	0	0	0	0	0	80.224	0	0	0	130.862	0	0	0	0	0	0	0	0	0	0	0	0	0
35857	Collagen alpha-1(III) chain	GETGppGpAGFpGAPGQNGEPGGK	2196.1	35.734	0	0	0	0	0	0	0	14.022	0	0	0	0	0	0	0	0	0	6.821	0	575.997	0	0	0	0	0	0	0	0	0	0	4.69	0	0	0	0	0	0	0	0	0	0	0	0	0	0
37380	Collagen alpha-1(III) chain	GEGGPpGVAGPPGGSGPAGPpGpQGVK	2282.11	35.661	0	0	0	0	0	19.981	216.122	402.906	180.332	147.385	63.856	36.811	78.205	241.795	187.195	0	296.027	424.745	365.82	265.921	0	0	0	0	118.398	218.28	363.152	62.432	991.423	711.114	0	313.246	375.094	0	147.606	107.883	587.278	272.596	272.982	778.817	0	377.061	0	209.94	121.841
2164	Collagen alpha-1(V) chain	GmpGQTGPK	903.455	26.452	0	0	0	0	0	0	3.297	0	1.394	0	0	0	0	0	0	0	0	0	0	0	0	0	0	0	0	21.576	8.986	0	0	0	0	0	0	0	0	2.959	0	0	0	0	0	0	0	0	0
2450	Collagen alpha-1(V) chain	GEIGppGPR	910.477	28.651	4.377	0	0	0	0	14.407	0	0	0	0	0	0	0	0	0	0	0	0	0	0	0	0	0	0	0	0	0	0	0	0	0	0	0	0	0	0	0	0	0	0	0	0	0	0	0
7873	Collagen alpha-1(V) chain	GPpGPAGPEGR	1006.54	30.178	0	0	0	0	0	0	0	906.822	19.509	0	0	0	0	0	0	0	0	0	0	0	0	0	0	0	0	0	0	0	0	0	0	0	0	0	0	5.81	0	0	0	0	0	0	0	0	0
14942	Collagen alpha-1(V) chain	RGPpGPAGPEGR	1162.63	26.662	0	0	0	0	0	0	0	10.275	0	0	0	0	0	0	0	0	0	0	0	4.292	0	0	0	0	0	0	0	0	0	0	0	0	0	0	0	16	0	0	0	0	0	0	0	0	0
31806	Collagen alpha-1(V) chain	GEPGEAGEpGLPGEGGPPGpK	1917.02	35.024	112.777	66.152	0	22.887	0	0	0	460.44	180.277	129.189	196.677	256.82	371.205	184.405	287.101	0	146.375	100.215	110.546	12.317	329.912	0	0	0	0	0	0	0	467.34	0	184.472	219.215	402.635	0	144.108	268.278	466.182	310.993	293.282	315.144	126.846	0	734.675	322.609	623.44
1350515	Collagen alpha-1(V) chain	LGVpGLpGYpGR	1229.63	31.776	0	0	0	0	0	0	0	0	0	0	0	0	2980.9	0	0	0	0	0	0	0	0	0	0	0	0	0	0	0	0	0	0	0	10.266	0	0	0	0	0	0	0	0	0	0	0	0
23163	Collagen alpha-1(VII) chain	GEPGSNGDQGPKGDR	1469.67	26.178	0	0	79.385	0	0	14.579	0	0	0	0	0	0	0	0	0	0	0	0	0	0	0	0	0	0	0	0	117.239	0	0	0	0	0	0	0	0	0	0	0	0	0	0	0	0	0	0
25222	Collagen alpha-1(VII) chain	GEmGEPGVPGQSGAPGK	1569.6	32.515	0	0	0	0	0	0	0	0	0	0	0	0	0	0	0	0	0	0	0	0	0	0	0	0	0	0	0	0	0	0	40.561	0	0	0	0	0	0	0	0	0	0	0	0	0	0
37924	Collagen alpha-1(VII) chain	LSVLGpAGEGpSAEVTARTESPR	2312.28	30.942	0	0	0	0	0	0	26.397	29.752	0	0	0	0	73.134	187.084	108.758	687.873	0	0	0	0	0	0	0	1194.21	0	0	64.291	0	0	0	0	0	0	0	0	9.237	0	0	0	0	0	0	0	0	0
665	Collagen alpha-1(IX) chain	GPpGALGLR	852.49	27.646	0	0	0	0	0	0	11.332	0	2.076	0	0	0	0	0	0	0	0	0	0	0	0	0	0	0	0	0	0	0	0	0	0	0	0	0	0	4.446	0	0	0	0	0	0	0	0	0
957	Collagen alpha-1(IX) chain	VGPVGDpGR	868.489	28.184	0	0	0	0	0	0	2.026	0	0	0	0	0	0	0	0	0	0	0	0	0	0	0	0	0	0	13.484	16.288	0	0	0	0	0	0	0	0	0	0	0	0	0	0	0	0	0	0
2008	Collagen alpha-1(IX) chain	GLpGVEGPR	896.491	28.573	0	0	0	0	0	41.869	0	123.347	0	0	17.801	0	0	0	0	0	0	0	0	0	0	0	0	0	0	0	0	0	0	0	0	0	0	0	0	0	0	0	0	0	0	0	0	0	0
11093	Collagen alpha-1(IX) chain	SGYpGLPGmR	1065.48	29.636	0	0	0	0	0	0	0	0	0	0	0	0	0	0	0	0	0	0	0	0	0	0	0	0	0	0	0	0	44.749	0	0	0	0	0	0	0	0	0	0	0	0	0	0	0	0
11744	Collagen alpha-1(IX) chain	SGYpGLpGmR	1081.49	29.734	0	0	0	0	0	0	19.257	481.78	0	0	0	0	0	0	0	0	0	0	0	0	0	0	0	0	0	0	102.274	55.852	0	0	0	0	0	0	0	0	43.404	0	0	202.508	81.574	0	0	0	0
18917	Collagen alpha-1(IX) chain	GELGPVGSpGLpGK	1295.59	32.181	0	0	119.884	0	0	0	0	0	0	0	0	0	95.323	0	0	0	0	0	0	0	0	0	0	0	0	196.222	0	0	0	0	0	0	0	0	0	0	0	0	0	0	0	0	0	0	0
31347	Collagen alpha-1(IX) chain	GVQGEQGATGLpGVQGpPGR	1892.99	34.521	0	0	0	0	0	2344.19	0	1339.84	0	0	0	0	0	375.757	0	0	0	0	0	0	0	0	0	0	0	0	0	0	0	0	0	0	477.108	0	0	255.583	0	0	0	0	0	0	128.823	0	0
33943	Collagen alpha-1(IX) chain	GLDGEpGPQGLpGApGDQGQR	2050.07	35.344	6.499	0	77.972	0	0	4538.37	31.987	1631.63	0	0	0	0	0	0	104.902	0	0	68.022	192.311	0	0	0	0	1186.73	0	0	0	45.513	0	0	102.914	260.186	81.195	0	0	0	158.274	68.871	49.217	0	74.886	60.653	0	0	0
34192	Collagen alpha-1(IX) chain	GPNGLpGAIGLpGDPGpASYGR	2067.06	35.163	15.006	0	0	0	0	0	7.429	0	28.157	47.04	0	0	0	29.354	171.781	0	0	0	0	28.843	0	0	0	428.63	0	0	0	182.109	0	0	0	499.805	0	0	0	47.905	0	66.93	0	0	0	0	0	0	0
1351474	Collagen alpha-1(IX) chain	GVQGEQGATGLpGVQGppGR	1908.92	34.038	0	0	0	15.205	0	0	0	0	20.915	0	0	0	0	0	0	0	0	0	0	0	0	57.7306	0	0	0	0	0	0	0	0	0	0	10.136	0	0	0	0	0	0	0	0	0	0	0	0
2477	Collagen alpha-1(XI) chain	GEVGQIGPR	911.441	28.423	0	0	0	0	0	1456.58	0	0	0	0	0	0	0	0	0	0	0	0	0	0	0	0	0	0	0	0	0	0	0	0	0	0	0	0	0	0	0	0	0	0	0	0	0	0	0
12256	Collagen alpha-1(XI) chain	RGPPGAAGAEGR	1094.64	21.26	3.793	0	0	0	0	0	0	0	0	0	0	0	0	0	0	0	0	0	0	0	0	0	0	0	0	0	0	0	0	0	0	0	0	0	0	0	0	0	0	0	0	0	0	0	0
22468	Collagen alpha-1(XI) chain	GPQGPQGPVGFpGPK	1434.76	32.93	0	0	0	0	0	359.626	0	605.984	0	0	0	0	0	0	0	0	0	0	21.495	0	0	0	0	0	0	0	0	0	0	0	0	0	36.051	0	0	19.249	41.118	20.206	0	0	0	51.221	0	0	0
22791	Collagen alpha-1(XI) chain	GPQGPQGPVGFpGpK	1450.76	33.027	5.865	10.977	0	0	0	0	0	1144.54	0	0	0	0	0	0	0	0	0	0	342.104	0	0	0	0	0	0	0	0	0	0	0	0	0	0	0	0	0	82.577	0	0	74.728	0	0	0	0	0
23669	Collagen alpha-1(XI) chain	GPQGppGppGDDGMR	1497.56	32.959	0	0	0	0	0	0	0	0	0	0	0	0	0	0	0	0	0	0	0	0	0	0	0	0	9201.67	0	0	0	0	8346.93	0	0	0	0	0	0	0	0	0	0	0	0	0	0	0
37757	Collagen alpha-1(XI) chain	TGppGPGGVVGPQGPTGETGPIGER	2302.19	35.762	65.13	0	0	0	0	10257.9	0	2274.86	0	0	0	0	102.282	0	35.397	0	0	0	0	0	0	0	0	0	0	0	0	0	0	0	0	104.915	0	0	0	3.493	0	0	0	22.613	15.226	0	0	0	0
43373	Collagen alpha-1(XI) chain	GTSGGDGPPGPPGERGPQGPQGPVGFPGPK	2737.44	32.187	0	0	0	0	0	0	3.691	0	3.375	0	0	0	0	0	0	0	0	0	0	8.833	0	0	0	0	0	0	0	0	0	0	18.17	0	0	0	0	8.859	0	0	0	0	0	0	0	0	0
38609	Collagen alpha-1(XII) chain	GEPGPGGRpGFpGTPGMQGppGER	2352.22	30.998	7.972	0	0	0	0	98.297	0	0	0	0	0	0	0	0	0	0	0	0	11.99	0	0	0	0	0	0	0	0	0	0	0	0	0	0	0	0	0	0	0	0	0	0	0	0	0	0
43743	Collagen alpha-1(XII) chain	cPAFpNScTcTQDSVGPPGPPGPAGGPGAK	2779.33	36.791	0	0	0	0	0	0	2.18	70.264	15.648	0	0	0	0	0	0	0	0	49.363	0	59.117	0	0	0	0	0	29.466	0	0	35.339	0	30.639	23.564	0	0	0	37.452	116.052	0	94.499	97.09	127.479	21.198	0	0	66.08
3644	Collagen alpha-1(XXII) chain	LIQEELGK	928.518	29.383	0	0	0	0	0	50.069	0	145.315	0	0	0	0	0	0	0	0	0	0	0	0	0	0	0	0	0	0	0	0	0	0	0	0	0	0	0	0	0	0	0	0	0	0	0	0	0
13355	Collagen alpha-1(XXII) chain	GESPSmETLR	1121.47	30.079	0	0	0	0	0	0	0	0	0	0	32.713	0	0	0	0	0	0	0	0	0	0	20.1435	0	0	0	0	0	0	0	0	0	0	0	0	0	0	0	0	0	0	0	0	0	0	0
17184	Collagen alpha-1(XXII) chain	AGEpGLpGPEGAR	1238.57	31.398	7.469	0	0	0	0	0	0	0	0	0	0	0	0	0	0	0	0	0	0	0	0	0	0	0	0	0	0	0	0	0	0	0	71.735	20.0288	0	0	0	0	0	0	0	24.514	0	0	0
24497	Collagen alpha-1(XXII) chain	DGDTGPTGPQGPQGPR	1535.63	32.778	0	0	0	0	0	0	0	0	0	0	0	0	0	0	0	0	0	0	0	0	0	0	0	0	0	195.459	40.391	0	0	0	0	0	0	0	0	0	0	0	0	0	0	0	0	0	53.204
33203	Collagen alpha-1(XXII) chain	EGPpGPQGPSGLpGIpGEEGK	2004.06	34.929	0	0	0	0	0	102.412	7.416	0	0	51.647	0	0	8.517	0	233.825	0	0	0	0	0	0	0	0	0	0	0	0	0	0	0	111.86	0	0	0	0	35.552	0	0	0	0	60.652	22.071	0	0	0
34501	Collagen alpha-1(XXII) chain	GDVGpAGppGVPGSVVQQEGLK	2092.03	35.317	0	0	0	0	0	0	0	0	21.653	95.619	0	0	0	0	230.282	0	0	11.798	0	23.475	0	0	236.033	0	0	710.17	785.44	473.142	0	0	0	100.607	0	0	0	199.777	0	0	0	0	189.273	0	545.356	0	0
37605	Collagen alpha-1(XXII) chain	GpQGpPGLPGpPGRVGAPGLQGER	2295.22	30.16	0	0	0	0	0	52.178	65.467	0	424.469	0	33.486	0	0	0	0	0	0	52.827	0	41.242	0	205.497	0	0	0	0	0	0	0	0	57.892	0	27.538	30.6804	0	298.825	0	0	41.06	0	0	41.112	0	0	0
14638	Collagen alpha-1(XXIV) chain	GAVGLpGPpGmR	1155.59	28.86	0	0	32.732	0	0	131.64	13.024	0	0	0	0	0	0	0	0	0	0	0	0	0	0	0	0	0	0	0	0	0	0	0	0	0	0	0	0	0	0	0	0	0	0	0	0	0	0
31169	Collagen alpha-1(XXIV) chain	GDTGPpGPPGPAGIPGPSGKR	1884.01	28.582	0	0	0	0	0	33.244	0	0	0	0	0	0	0	0	0	0	0	0	0	0	0	0	0	0	0	0	0	0	0	0	0	0	0	0	0	114.519	0	0	0	0	0	0	0	0	0
42843	Collagen alpha-1(XXVII) chain	mGAQGEpGLAGYDGHKGIVGPLGPPGPK	2688.41	27.41	0	0	0	0	0	0	0	0	0	0	0	0	0	0	0	0	0	0	0	0	0	0	34.958	0	0	0	0	0	0	0	0	0	0	0	0	23.386	0	0	0	0	0	0	0	0	0
46796	Collagen alpha-1(XXVII) chain	GLpGpRGQLGpEGDEGPMGPPGAPGLEGQpGR	3097.63	33.13	0	0	0	0	0	6776.88	0	1458.18	0	0	0	0	0	0	0	0	0	0	0	0	0	0	0	0	0	0	0	0	0	0	7.96	0	4.792	0	0	0	0	0	0	0	0	0	0	0	0
19716	Collagen alpha-1(XXVIII) chain	GDKGEIGEPGSPGK	1326.74	25.609	0	0	0	0	0	0	0	0	0	0	0	0	0	0	0	0	0	0	0	0	0	0	0	0	0	0	0	0	0	0	0	0	0	0	0	121.101	0	0	0	0	0	0	0	0	0
26682	Collagen alpha-1(XXVIII) chain	GLpGppGPpGYGSQGIK	1641.72	33.156	0	0	0	0	0	0	0	539.812	0	0	0	0	0	0	0	0	0	0	0	0	0	0	0	0	0	0	0	0	0	0	0	0	0	0	0	0	0	0	0	0	0	0	0	0	0
25386	Collagen alpha-2(I) chain	GETGPSGPVGPAGAVGpR	1577.78	33.094	0	0	0	0	0	0	0	0	0	0	0	0	40.275	0	0	0	0	0	0	21.37	0	0	0	0	0	0	0	151.92	0	0	0	0	62.12	0	0	0	0	0	0	0	0	13.573	0	0	22.943
32571	Collagen alpha-2(I) chain	GEPGSAGPQGpPGPSGEEGKR	1963.01	29.028	0	70.528	0	0	0	0	13	63.156	2.787	0	0	0	0	0	0	0	0	0	0	13.246	0	0	0	0	0	1758.99	224.052	0	101.129	0	0	0	11.769	0	0	0	0	0	0	0	0	20.605	0	0	36.296
39235	Collagen alpha-2(I) chain	GEVGLPGLSGPVGppGNPGANGLTGAK	2401.13	35.656	0	0	0	0	0	0	36.963	34.632	49.874	8.284	0	0	0	0	0	0	0	44.126	58.943	42.013	0	0	0	0	0	22.511	0	0	48.955	0	56.816	105.229	60.101	0	0	66.343	105.228	110.623	0	68.015	0	0	0	0	39.89
42601	Collagen alpha-2(I) chain	GSpGERGEVGpAGPNGFAGPAGAAGQpGAK	2665.45	31.783	0	0	0	0	0	0	7.21	0	0	0	0	0	0	0	0	0	0	0	70.241	0	0	0	0	0	0	0	0	0	0	0	32.778	0	9.613	0	0	0	0	0	55.846	0	0	33.466	0	0	0
11068	Collagen alpha-2(IX) chain	GPVGQpGPQGR	1064.55	33.057	0	0	0	0	0	0	0	0	0	0	0	0	0	0	0	0	0	0	0	0	0	0	0	0	0	0	0	0	0	0	0	0	0	0	0	0	0	0	0	0	0	0	0	0	0
22244	Collagen alpha-2(IX) chain	DATDQHIVDVALK	1423.81	28.155	0	0	215.677	0	0	7869.68	5.271	1246.16	0	0	0	0	0	0	63.48	0	0	0	0	0	0	30.6513	0	1169.5	0	0	0	0	0	0	0	0	0	0	0	4.249	0	0	0	0	0	0	0	0	0
24421	Collagen alpha-2(IX) chain	mLQEQLAEVAVSAK	1531.7	32.756	0	0	0	0	0	159.167	0	0	0	0	0	0	0	0	0	0	0	0	0	0	0	0	0	0	0	0	0	0	0	0	0	0	0	0	0	0	0	0	0	0	0	0	0	0	0
26541	Collagen alpha-2(IX) chain	GVpGIVGAVGQIGNTGPK	1635.97	34.406	0	0	0	0	0	0	0	0	0	0	0	0	0	0	52.988	0	0	0	0	0	0	0	0	0	0	0	0	0	0	0	0	0	0	0	0	0	0	0	0	0	0	0	0	0	0
28627	Collagen alpha-2(IX) chain	GDQGERGpVGQpGpQGR	1738.87	27.856	0	0	0	0	0	149.005	0	107.923	0	0	0	0	0	0	0	0	0	0	0	0	0	0	0	0	0	0	0	0	0	0	14.483	0	0	0	0	0	0	0	0	0	0	0	0	0	0
1351011	Collagen alpha-2(IX) chain	MLQEQLAEVAVSAK	1515.86	33.366	0	0	0	0	0	2447.65	1.434	557.173	0	0	0	0	0	0	0	0	0	0	0	0	0	0	0	1711.7	0	0	0	0	0	0	0	111.253	0	0	0	0	0	0	0	0	0	0	0	0	0
13358	Collagen alpha-2(XI) chain	GLPGPQGSPGQK	1121.55	30.366	0	6.776	0	0	0	0	0	0	0	0	0	0	0	0	0	0	0	0	0	0	0	0	0	0	0	0	0	0	0	0	0	0	0	0	0	0	0	0	0	0	0	0	0	0	0
14086	Collagen alpha-2(XI) chain	GLpGPQGSPGQK	1137.55	30.37	91.001	295.937	0	421.981	0	0	685.542	758.831	1639.09	1582.21	1905.55	1151.66	881.417	293.203	6355.48	6835.76	385.923	1150.85	1225.14	651.914	1497.57	1083.19	6481.12	2512.84	9109.74	8058.24	8682.99	6407.37	5927.28	7889.29	1297.51	1080.03	1323.71	1367.78	1617.25	1299.22	622.916	1456.32	1387.97	1888.95	2949.17	653.824	2168.96	1548.03	1284.63
27475	Collagen alpha-2(XI) chain	GNEGpSGppGpAGSPGER	1682.8	33.479	41.528	0	0	0	0	0	1.441	199.393	28.625	49.659	0	0	0	0	76.486	0	0	0	0	0	0	31.2949	0	0	106.844	112.822	0	0	61.146	0	0	336.003	0	0	0	59.624	0	286.252	0	1334.69	283.968	0	0	136.624	154.44
43535	Collagen alpha-2(XI) chain	GPTGDDGPKGNPGPVGFPGDPGPpGEGGPR	2754.46	33.19	242.019	155.328	0	0	0	0	79.087	0	96.343	171.396	0	0	0	0	86.087	0	0	0	0	0	0	0	0	0	0	0	0	0	58.539	0	0	114.684	12.607	45.4882	56.5411	309.911	17.928	0	0	0	0	0	0	0	264.805
7258	Collagen alpha-3(IX) chain	GPpGIpGApGK	994.551	29.836	1.596	0	0	0	0	343.421	0	0	0	0	0	0	0	0	0	0	0	15.913	0	0	0	0	0	0	0	0	0	0	0	0	0	0	0	0	0	0	0	0	0	0	0	0	0	0	0
7986	Collagen alpha-3(IX) chain	GppGIpGApGK	1010.54	32.403	0	0	0	0	0	0	0	0	0	0	0	0	0	0	0	0	0	0	0	0	0	0	0	0	0	0	0	0	0	0	0	0	0	0	0	1.268	0	0	0	0	0	0	0	0	0
14985	Collagen alpha-3(IX) chain	GLpGPLGpPGDR	1163.59	31.148	0	37.937	67.049	30.401	0	489.247	0	0	0	0	0	0	0	0	0	0	0	0	0	0	0	0	0	382.258	0	0	0	0	0	0	0	0	0	0	0	0	0	0	0	0	0	0	0	0	0
15076	Collagen alpha-3(IX) chain	GPTGELGDpGPR	1167.62	30.87	0	0	0	0	0	0	9.159	451.645	0	0	0	0	0	0	0	0	0	0	0	0	0	0	0	0	0	0	0	0	0	0	0	0	0	0	0	0	0	0	0	0	0	0	0	0	0
15372	Collagen alpha-3(IX) chain	GLpGPLGppGDR	1179.57	30.891	0	31.915	51.459	56.675	0	426.954	0	0	0	0	0	0	0	0	0	0	0	0	0	0	0	9.5934	0	0	0	0	0	0	0	0	0	0	0	0	0	23.266	0	0	0	0	0	0	0	0	0
21714	Collagen alpha-3(IX) chain	GDQGIAGSDGLpGDK	1401.67	32.659	0	0	0	451.207	0	0	0	0	0	0	0	0	0	0	0	0	0	0	0	0	0	0	0	0	0	0	0	0	0	0	0	0	0	0	0	0	0	0	0	0	58.561	0	0	0	0
25372	Collagen alpha-3(IX) chain	GSAGALGPQGPpGApGVR	1576.84	33.227	2741.29	2323.11	0	0	0	73.319	1854.64	0	1370.11	0	0	0	2365.04	3734.66	0	4204.92	0	0	0	1467.7	0	2464.62	0	0	0	519.552	377.834	36.841	2536.85	3734.17	0	0	0	0	0	1493.86	733.374	176.261	0	114.965	0	1061.42	0	0	350.031
32026	Collagen alpha-3(IX) chain	GDpGPpGPAGLpGSVGLQGPR	1930.03	34.902	25.816	48.026	0	0	0	42.449	0	973.1	153.136	0	0	0	18.29	0	0	0	0	0	370.934	0	0	0	0	0	0	785.234	0	0	23.738	0	0	0	0	0	0	148.476	0	0	291.579	0	246.937	0	0	0	0
38916	Collagen alpha-3(IX) chain	DGEKGDpGpPGpAGLpGSVGLQGPR	2375.26	31.021	0	0	0	0	0	0	0	0	56.073	0	0	0	0	0	0	0	0	0	0	0	0	0	0	0	0	0	0	0	0	0	0	0	0	0	0	0	0	0	0	0	0	0	0	0	19.764
33519	Collagen alpha-4(IV) chain	GERGPDGppGFpGQpGSHGR	2022.01	24.633	0	0	0	0	0	0	0	0	0	0	0	0	0	0	0	0	0	0	0	0	0	0	0	0	0	0	0	0	0	0	0	0	0	0	0	77.928	0	0	0	0	0	0	0	0	0
1350705	Collagen alpha-4(IV) chain	GDpGSpGISPpGPR	1337.55	31.381	0	24.637	0	0	0	0	0	38.908	0	0	0	0	0	0	0	0	0	0	0	0	0	0	0	0	0	0	0	0	0	0	0	0	0	0	0	0	0	0	0	0	0	0	0	0	0
27574	Collagen alpha-5(IV) chain	GQPGLPGFpGTpGPPGPK	1688.83	33.297	33.663	0	402.239	0	0	0	132.337	492.526	117.706	184.626	237.988	624.715	0	0	235.506	0	37.4476	80.834	1293.6	115.662	622.786	0	289.383	0	1419.32	0	1267.12	0	122.857	50.6165	546.918	347.881	268.072	0	0	435.648	527.07	2008.4	345.986	245.249	648.124	138.796	1410.77	140.721	0
33332	Collagen alpha-5(IV) chain	GSpGIPGApGPIGPPGSPGLpGK	2011.08	34.965	17.878	86.164	2490.47	254.865	760.996	209.734	6.717	379.939	0	0	0	0	14.773	403.823	280.774	1081.08	0	126.964	199.521	0	0	0	0	1172.15	0	0	0	449.993	0	0	0	95.618	117.207	0	0	0	0	0	0	239.218	76.641	229.605	0	0	0
2	Complement C3	WLILEK	800.426	27.233	0	0	0	0	0	0	2.49	0	0	0	0	0	0	0	0	0	0	0	0	0	0	0	0	0	0	3.354	0	0	12.753	0	0	0	0	0	0	2.23	0	0	0	5.489	0	0	0	0	27.821
28	Complement C3	TFISPIK	804.514	27.764	0	0	0	0	0	0	8.779	0	6.145	0	0	0	0	0	0	0	0	7.987	4.712	3.726	0	0	0	0	0	12.244	0	0	0	0	10.956	0	10.774	0	0	8.222	0	0	0	0	0	0	0	0	0
512	Complement C3	WLNEQR	844.482	27.631	0	0	0	0	0	0	6.519	0	9.289	0	0	0	0	0	0	0	0	0	16.796	6.35	0	0	0	0	0	6.108	0	0	3.651	0	7.932	0	0	0	0	4.339	0	9.56	0	0	11.777	0	0	0	0
704	Complement C3	IFTVNHK	857.53	22.105	2.735	0	0	0	0	0	3.19	0	0	0	0	0	0	0	0	0	0	0	0	5.612	0	0	0	0	0	0	0	0	0	0	5.813	0	11.709	0	0	3.036	0	0	0	0	0	0	0	0	0
1177	Complement C3	LMNIFLK	877.548	27.997	0	0	0	0	0	0	25.363	0	3.514	0	0	0	0	0	0	0	0	0	0	7.072	0	0	0	0	0	0	0	0	0	0	7.7	0	10.904	0	0	10.561	0	0	0	0	0	0	0	0	0
1607	Complement C3	LKGPLLNK	881.528	22.653	22.443	0	0	13.998	0	0	18.629	0	21.604	53.412	0	0	19.821	0	0	0	0	26.151	45.497	19.119	0	0	0	0	0	0	20.735	0	15.674	0	0	0	0	0	0	0	0	0	0	0	0	36.433	0	0	92.24
2019	Complement C3	AVLYNYR	897.518	28.398	0	0	0	0	0	0	0	5.564	0	0	0	0	0	0	0	0	0	0	0	0	0	0	0	0	0	0	10.857	0	0	0	0	0	0	0	0	0	0	0	0	0	0	0	0	0	0
2142	Complement C3	KLVLSSEK	902.509	22.676	0	0	0	0	0	0	0	0	0	0	0	0	0	0	0	0	0	0	0	0	0	0	0	0	0	0	0	0	0	0	0	0	0	0	0	0	0	0	0	0	0	0	0	0	0
2167	Complement C3	GVFVLNKK	903.502	21.297	1.262	0	0	0	0	0	0	0	0	0	0	0	0	0	0	0	0	0	0	0	0	0	0	0	0	0	0	0	6.232	0	0	0	0	0	0	1.163	0	0	0	0	0	0	0	0	0
5002	Complement C3	EALKLEEK	958.568	23.891	0	0	38.801	0	0	0	20.826	0	0	38.711	0	0	0	0	0	0	0	26.491	0	5.736	0	0	0	0	0	0	0	0	0	0	0	0	0	0	0	0	0	0	0	0	0	0	0	0	0
7737	Complement C3	TGLQEVEVK	1001.48	28.744	0	0	0	232.979	0	0	0	38.761	0	0	0	0	0	0	0	0	0	0	20.85	0	0	0	0	0	0	0	0	0	0	0	0	0	19.506	0	0	0	0	33.074	32.382	190.3	0	16.966	0	0	0
7815	Complement C3	ADIGcTPGSGK	1003.5	29.395	0	0	0	0	0	0	0	0	0	0	0	0	0	41.66	0	0	41.5631	0	0	9.029	0	0	0	0	0	0	0	0	0	0	0	0	0	0	0	0	0	0	0	0	0	0	0	0	0
7845	Complement C3	DScVGSLVVK	1004.51	30.802	0	0	0	0	0	0	0	0	19.692	0	0	0	3.981	56.243	0	0	0	22.273	16.104	11.321	0	0	0	0	0	4.84	17.495	0	34.719	0	0	0	16.395	0	0	10.775	22.057	0	0	0	0	0	0	0	0
11764	Complement C3	GYTQQLAFR	1082.58	30.094	0	0	265.517	0	2052.38	0	71.673	0	0	57.977	0	0	0	43.521	61.039	0	0	40.541	0	37.748	23.9677	0	0	0	0	0	0	0	0	28.7535	30.166	0	40.776	35.4043	0	51.821	0	0	0	0	0	59.712	0	0	0
12980	Complement C3	VLLDGVQNPR	1109.63	30.833	342.228	35.038	284.603	108.901	0	0	1288.3	0	510.184	1051.51	0	0	0	0	0	0	0	1290.23	0	932.994	0	1300.66	0	1109.07	0	0	0	0	62.494	420.663	1425.92	1132.28	1280.76	0	0	906.749	1462.57	0	0	0	1608.68	670.127	0	1440.33	0
14107	Complement C3	FYYIYNEK	1138.57	31.278	0	0	0	0	0	0	0	0	0	0	0	0	0	0	0	0	0	0	0	0	0	0	0	0	0	0	0	0	0	0	20.792	0	0	0	0	0	28.881	0	40.92	0	0	0	0	0	0
14424	Complement C3	HQQTVTIPPK	1147.66	24.341	0	0	0	0	0	0	0	0	0	0	0	0	0	0	0	0	0	62.471	0	0	0	65.9081	0	0	0	0	0	0	0	0	0	0	130.172	0	0	57.854	0	0	0	0	0	0	0	0	0
14534	Complement C3	QPSSAFAAFVK	1151.56	31.492	6.244	0	0	0	0	40.097	0	0	0	0	0	0	0	0	0	0	0	0	0	0	0	0	0	0	0	0	0	0	0	0	0	0	0	0	0	0	0	0	0	0	0	0	0	0	0
15717	Complement C3	DFDFVPPVVR	1189.66	32.391	45.475	51.298	0	0	0	79.337	99.407	60.162	54.945	53.95	0	43.808	27.852	0	0	0	0	165.66	86.922	77.166	58.0655	0	0	0	48.6379	0	0	0	17.171	45.054	105.381	0	175.012	0	0	102.553	183.902	82.055	110.753	136.522	183.357	143.148	0	0	126.83
15732	Complement C3	SDDKVTLEER	1190.64	25.281	26.938	0	0	0	0	0	0	0	68.265	45.684	0	0	0	0	0	0	0	0	0	0	0	35.9928	0	0	108.491	0	0	0	0	0	0	0	0	111.408	0	74.768	0	0	0	0	0	0	0	0	76.896
16138	Complement C3	YYTYLIMNK	1207.59	33.264	0	0	0	0	0	0	0	0	0	0	0	0	0	0	0	0	0	0	0	0	0	0	0	0	0	0	0	0	0	0	0	0	0	0	0	0	0	0	0	0	0	0	0	0	0
16253	Complement C3	KGYTQQLAFR	1210.67	27.096	0	0	0	0	0	0	0	0	0	0	0	0	0	0	0	0	0	0	0	0	0	0	0	0	0	0	0	0	0	0	0	0	0	0	0	0	0	0	0	0	0	0	0	0	0
16270	Complement C3	VTIKPAPETEK	1211.6	24.506	0	0	0	0	0	0	0	0	0	0	0	0	0	0	0	0	0	0	0	0	0	0	0	0	0	0	0	0	0	0	0	0	0	0	0	0	0	0	0	0	0	0	0	0	0
16677	Complement C3	YYTYLImNK	1223.51	30.563	0	325.827	26.014	0	0	0	0	0	0	0	0	0	15.033	0	0	0	0	0	0	0	0	0	0	0	0	0	0	0	0	0	0	0	0	0	0	0	0	0	0	0	0	0	0	0	0
17488	Complement C3	FYHPEKEDGK	1248.65	21.44	0	0	0	0	0	0	0	0	0	0	0	0	0	0	0	0	0	0	0	0	0	0	0	0	0	0	0	0	0	0	0	0	0	0	0	0	0	0	0	0	0	0	0	0	0
18536	Complement C3	ENEGFTVTAEGK	1280.65	32.114	0	5.035	0	0	0	0	12.552	132.37	0	0	0	0	0	0	0	0	0	134.926	70.008	0	0	0	0	0	0	0	0	0	0	0	95.753	0	161.683	0	0	0	0	75.236	60.274	176.913	90.656	123.349	0	0	0
18722	Complement C3	SGSDEVQVGQQR	1288.7	32.03	0	0	0	0	0	0	0	0	0	0	0	0	0	0	0	0	0	0	0	0	0	78.9405	0	158.672	0	0	0	0	0	0	0	0	0	0	0	0	0	0	0	0	0	182.265	0	0	0
19574	Complement C3	DQLTcNKFDLK	1322.59	24.736	0	0	2296.01	2015.82	0	0	0	0	0	0	28.454	0	0	0	0	0	0	0	0	0	0	0	0	0	0	0	0	96.557	0	0	0	0	0	0	0	0	0	0	0	0	0	0	0	0	0
21021	Complement C3	TIYTPGSTVLYR	1369.7	32.644	0	792.756	0	1463.05	0	0	0	1221.66	0	0	0	0	0	0	0	0	0	0	123.324	0	0	0	0	0	0	0	3182.05	0	0	0	0	3581.95	0	0	0	42.694	26.984	72.344	14.146	2070.12	85.483	29.509	174.088	0	0
21431	Complement C3	KQELSEAEQATR	1388.74	26.065	0	0	0	0	0	0	0	0	0	0	0	0	0	0	0	0	0	0	5.548	0	0	0	0	0	0	0	0	0	0	0	0	0	0	0	0	0	0	0	0	0	0	0	0	0	0
21707	Complement C3	SSLSVPYVIVPLK	1400.87	32.955	157.907	69.472	0	0	0	0	149.546	0	122.974	86.856	0	62.869	0	48.055	65.383	0	375.233	0	58.224	226.442	150.768	249.958	0	0	0	0	0	0	108.766	175.969	175.493	58.268	338.182	429.591	84.5036	252.383	368.725	128.027	190.98	0	149.875	189.834	0	0	157.456
23169	Complement C3	IPIEDGSGEVVLSR	1469.82	33.357	0	574.297	0	0	0	0	258.473	437.353	327.899	424.183	341.758	538.991	275.654	618.642	1010.26	0	247.781	400.491	643.744	300.216	356.294	455.517	650.904	0	1052.92	324.022	309.33	109.261	830.693	0	290.916	701.727	686.243	563.778	528.719	579.283	829.733	598.493	0	0	957.447	533.34	737.207	470.476	1447.91
23179	Complement C3	AAVYHHFISDGVR	1470.83	22.348	0	0	0	0	0	0	8.188	99.227	0	0	0	0	0	0	0	0	0	0	0	8.813	0	98.2861	0	0	0	36.414	0	0	102.437	33.1502	0	0	48.938	0	0	0	0	0	0	0	0	0	0	0	0
23541	Complement C3	GQGTLSVVTMYHAK	1490.83	26.829	0	0	0	0	0	0	136.347	0	162.602	0	0	0	0	121.246	0	0	76.646	0	0	212.552	0	282.654	0	0	0	0	0	0	0	135.958	316.246	0	156.956	478.043	0	257.166	0	0	0	0	0	166.808	0	0	0
26380	Complement C3	RIPIEDGSGEVVLSR	1625.91	27.825	0	0	0	0	0	0	35.994	8.407	0	0	0	0	0	0	0	0	0	30.731	0	11.04	0	0	0	0	0	0	0	0	0	0	21.959	0	0	14.0417	0	0	0	0	0	0	0	0	0	0	0
26608	Complement C3	TVMVNIENPEGIPVK	1638.87	33.918	1095.47	2339.47	1782.45	0	0	0	7614.31	2536.27	2665.36	5443.59	1636.77	4973.33	3507.16	4944.94	3344.34	0	4723.83	3190.32	3571.7	3632.19	2173.57	2023.22	2580.82	6960.79	2178.15	476.421	4575.63	2302.28	2718.92	0	3128.97	7436.35	3877.62	2410.41	3802.47	4354.27	3582.83	2339.49	3938.15	10284.3	0	4297.68	2811.94	5178.9	4973.08
26669	Complement C3	AGDFLEANYMNLQR	1640.77	33.142	0	0	0	0	0	0	0	0	0	0	0	0	0	0	93.875	0	0	0	1523.27	0	0	0	0	0	1124.77	108.504	0	0	0	0	0	0	0	0	0	0	0	0	0	0	0	0	0	0	0
26969	Complement C3	TVmVNIENPEGIPVK	1654.87	34.071	0	0	0	0	0	0	454.828	403.938	0	388.532	0	0	20.504	0	0	0	154.491	0	1649.22	233.581	0	0	0	0	0	0	0	0	0	0	0	0	32.853	0	0	789.785	0	802.852	368.862	153.632	38.895	746.854	1265.86	285.146	316.074
27011	Complement C3	AGDFLEANYmNLQR	1656.84	33.142	8366.73	9453.5	4707.34	14512.6	1793.64	2066.12	10689.9	9990.2	15817.1	24022.1	20474.5	19012.6	23115	25073.3	27833.8	17382.8	14701.3	16744.3	10366.7	15447.7	30202.7	30868.6	31054.9	8491.8	27383.4	18668.1	32530.4	17107.3	31739.8	35282.6	17653.1	14243.1	17325.7	29920.8	28915	20787.5	23019.1	15460.3	19793.2	20907.7	25462.3	15080.3	19969.1	31143.4	23756.1
29438	Complement C3	SGIPIVTSPYQIHFTK	1787.04	28.604	377.79	0	0	0	0	220.703	375.2	0	446.612	55.398	0	0	0	0	0	0	165.619	0	0	508.449	0	282.47	0	0	0	149.173	0	0	72.852	389.865	227.38	0	179.878	0	0	474.765	0	0	0	0	0	101.421	0	0	0
29965	Complement C3	SNLDEDIIAEENIVSR	1815.97	34.52	106.316	76.655	0	49.399	0	0	228.252	0	194.785	312.149	461.576	502.471	201.163	345.171	556.589	0	206.081	5.011	0	258.079	332.95	244.508	0	0	760.662	246.873	57.671	51.115	6.708	380.652	75.83	324.723	223.101	466.237	386.261	496.34	227.393	140.127	84.2	0	250.386	188.067	0	412.162	1778.23
30959	Complement C3	TELRPGETLNVNFLLR	1871.08	28.496	0	0	0	0	0	0	138.796	0	0	0	0	0	13.33	0	0	0	46.6592	72.13	241.711	126.368	0	394.483	0	0	0	57.681	0	0	0	51.4708	372.483	0	413.337	364.6	0	251.284	31.87	0	272.259	0	0	125.103	0	0	0
31277	Complement C3	LSINTHPSQKPLSITVR	1890.09	21.652	0	0	0	0	0	0	0	47.418	147.027	0	0	0	0	0	0	0	0	0	330.653	0	0	0	0	0	0	0	0	0	0	0	78.893	0	230.304	0	0	48.472	0	0	0	0	39.209	0	0	0	0
32922	Complement C3	SGQSEDRQPVPGQQMTLK	1985.04	28.8	0	0	0	0	0	0	36.397	93.862	8.539	0	0	0	0	0	0	0	0	28.063	434.475	31.033	0	0	0	0	0	0	0	123.003	0	187.693	35.631	0	46.432	0	0	0	0	370.535	81.074	0	389.186	38.602	228.769	0	0
35336	Complement C3	ILLQGTPVAQMTEDAVDAER	2156.16	35.594	10.201	0	158.039	0	0	0	200.797	0	36.245	151.277	0	0	0	0	189.901	0	0	24.41	0	319.849	0	227.475	0	286.252	0	125.91	0	64.439	0	0	87.018	0	404.431	0	0	214.248	139.877	0	66.888	79.904	0	44.18	0	0	486
35468	Complement C3	AYYENSPQQVFSTEFEVK	2165.11	35.237	87.977	63.483	0	9.421	0	0	0	140.628	154.16	171.99	138.202	185.308	78.587	0	259.414	0	46.5842	0	271.391	192.176	0	301.086	148.825	0	0	247.21	0	0	0	0	118.39	196.981	289.816	188.464	0	376.765	343.602	288.581	140.637	0	238.096	100.503	0	126.098	394.282
35547	Complement C3	ILLQGTPVAQmTEDAVDAER	2172.16	35.767	0	3.478	0	0	0	0	14.504	0	0	0	0	0	0	0	0	0	0	0	0	0	0	0	0	0	0	0	0	0	0	0	103.215	0	206.612	0	0	309.362	0	0	0	0	0	0	0	0	0
35875	Complement C3	VPVAVQGEDTVQSLTQGDGVAK	2197.17	35.869	452.505	472.919	67.079	553.025	0	0	0	0	334.422	0	310.916	533.24	0	491.706	794.739	0	303.119	300.266	366.567	0	0	0	457.866	0	871.959	0	0	0	777.166	0	0	606.997	19.52	0	445.285	679.174	0	394.497	390.014	216.563	488.9	0	0	0	1335.14
36867	Complement C3	VQLSNDFDEYIMAIEQTIK	2256.2	35.262	0	0	0	0	0	0	261.629	0	213.371	159.234	27.475	169.579	0	0	0	0	233.272	296.496	184.264	372.849	222.668	236.783	0	0	0	0	0	35.223	0	0	270.688	0	456.28	233.365	0	339.879	371.877	140.584	233.278	0	0	330.089	0	70.9642	0
41405	Complement C3	QKPDGVFQEDAPVIHQEMIGGLR	2563.41	27.523	182.857	112.943	0	0	0	0	142.604	0	110.262	0	77.41	0	13.236	0	0	0	0	0	0	91.756	0	110.028	57.961	0	0	11.365	0	0	30.403	69.7078	151.222	0	0	144.993	0	155.54	0	0	0	0	0	0	0	0	27.995
5693	Complement C4-A	VEYGFQVK	968.464	28.838	0	0	0	0	0	515.587	0	0	0	0	0	0	0	0	0	0	0	0	0	0	0	0	0	0	0	0	0	0	0	0	0	0	0	0	0	0	0	0	0	0	0	0	0	0	0
7196	Complement C4-A	FGLLDEDGK	992.483	29.211	0	0	0	0	0	0	0	37.321	0	20.629	342.55	90.088	0	0	0	0	0	0	0	0	0	0	0	0	0	0	0	0	0	0	0	0	0	0	0	0	0	0	0	0	0	0	0	0	0
12806	Complement C4-A	YVLPNFEVK	1107.59	30.417	0	0	0	0	0	729.865	0	43.069	2.596	0	0	0	0	0	0	0	0	0	0	0	0	0	0	0	0	0	0	0	0	0	6.582	0	0	0	0	33.627	31.218	0	0	0	0	0	0	0	0
1352086	Complement C4-A	VTASDPLDTLGSEGALSPGGVASLLR	2482.22	36.324	7.862	0	0	0	0	0	0	0	82.599	0	0	0	0	0	0	0	0	0	0	0	0	0	0	0	0	0	0	0	0	0	139.133	0	0	0	0	0	0	0	0	30.734	0	0	0	0	0
166	complement component 4B preproprotein	VFALDQK	819.491	28.864	0	0	0	0	0	0	21.297	11.583	16.255	11.351	19.021	0	0	0	75.154	0	0	11.635	14.914	9.972	0	0	60.323	0	0	64.052	54.645	43.761	63.689	0	24.109	40.382	47.775	0	0	17.783	24.047	36.81	28.328	45.433	33.585	0	0	0	8.293
428	complement component 4B preproprotein	ASSFLGEK	837.442	27.492	0	0	0	0	0	0	0	0	0	0	0	0	0	0	0	0	0	0	0	0	0	0	0	0	0	0	49.905	0	3.176	0	0	0	0	0	0	0	0	0	0	0	0	0	0	0	0
5361	complement component 4B preproprotein	GQIVFMNR	963.564	31.678	0	0	0	0	0	0	0	0	0	0	0	0	0	0	0	0	0	0	0	12.434	0	0	0	0	0	0	5.025	0	5.873	0	0	0	20.463	0	0	24.398	10.706	0	0	14.146	0	0	0	0	0
9613	complement component 4B preproprotein	DHAVDLIQK	1037.6	24.663	0	0	0	0	0	0	20.066	0	0	0	0	0	0	0	0	0	0	0	0	0	0	0	0	0	0	0	0	0	0	0	0	0	0	0	0	0	0	0	0	0	0	0	0	0	0
10226	complement component 4B preproprotein	AEFQDALEK	1049.54	29.707	0	0	0	0	0	0	59.356	753.643	22.112	0	0	0	0	0	0	0	0	63.208	55.124	14.277	0	0	0	0	0	0	0	0	0	0	78.62	453.069	0	0	0	19.443	0	114.091	102.462	703.514	253.352	57.876	0	0	0
10321	complement component 4B preproprotein	SHALQLNNR	1051.6	23.286	0	0	32.612	0	325.373	13.466	0	0	0	0	0	0	0	0	0	0	0	0	0	0	0	0	0	0	0	0	0	0	0	0	0	0	0	10.8383	0	9.141	0	0	0	0	0	0	0	0	0
13338	complement component 4B preproprotein	FGLLDEDGKK	1120.56	23.563	0	0	0	0	0	0	0	0	18.827	0	0	0	0	0	0	0	0	0	0	0	0	8.7341	0	0	0	0	0	0	0	0	0	0	0	0	0	0	0	0	0	0	0	0	0	0	0
20025	complement component 4B preproprotein	GSFEFPVGDAVSK	1338.7	32.091	3.784	0	0	0	0	0	0	178.879	0	0	0	0	0	0	0	0	0	0	38.164	0	0	0	0	0	0	0	197.376	0	0	0	0	0	0	0	0	0	0	0	0	85.139	0	0	0	0	0
24582	complement component 4B preproprotein	VLSLAQEQVGGSPEK	1540.75	33.096	318.171	346.811	0	0	0	0	0	0	0	0	0	0	0	0	495.271	0	0	0	0	0	0	0	0	0	0	0	0	0	272.075	0	0	0	0	0	0	0	0	0	0	0	0	0	0	0	0
25098	complement component 4B preproprotein	TTNIQGINLLFSSR	1562.73	32.896	0	0	0	0	0	0	0	0	0	0	0	0	0	40.101	0	0	0	0	0	0	0	0	0	0	0	0	0	0	0	0	0	0	0	0	0	0	0	0	0	156.743	0	0	0	0	0
34695	complement component 4B preproprotein	DDPDAPLQPVTPLQLFEGR	2107.16	36.277	20.671	0	0	0	0	0	49.365	0	41.669	0	0	0	27.349	148.465	140.778	0	0	133.466	63.188	62.31	0	0	26.297	602.5	0	0	0	0	59.605	0	35.304	22.641	82.892	0	0	51.969	101.817	54.625	55.677	0	82.294	58.603	155.178	0	86.834
35158	complement component 4B preproprotein	MRPSTDTITVMVENSHGLR	2142.91	24.605	0	0	0	0	0	0	0	0	0	35.717	0	0	0	0	0	0	0	0	0	0	92.5535	0	0	0	0	0	0	0	0	0	0	0	0	0	0	0	0	0	0	0	0	0	0	0	0
36305	complement component 4B preproprotein	ALEILQEEDLIDEDDIPVR	2224.18	35.805	19.642	154.595	0	0	0	0	252.533	118.809	73.823	0	0	0	0	0	273.553	0	0	309.475	0	240.365	171.823	0	0	0	0	40.39	293.38	0	0	0	0	0	19.933	209.921	0	228.289	0	0	0	0	0	30.445	0	0	582.49
37520	complement component 4B preproprotein	EGAIHREELVYELNPLDHR	2289.17	25.737	0	0	0	0	0	0	0	0	0	0	0	0	0	0	0	0	0	0	0	0	0	0	0	0	0	0	0	0	0	0	0	0	0	0	0	0	0	0	0	0	0	0	0	0	0
43719	complement component 4B preproprotein	STQDTVIALDALSAYWIASHTTEER	2777.52	32.091	0	0	0	0	0	0	143.158	0	31.372	49.674	0	0	0	0	0	0	57.728	212.035	0	98.436	0	0	0	0	0	0	0	0	0	0	35.775	0	76.676	54.2169	0	0	0	0	0	0	0	84.115	0	0	0
9257	Complement component C9	VVEESELAR	1030.57	29.823	532.817	433.581	0	184.867	1542.72	0	534.478	576.51	350.241	567.215	633.431	545.285	261.997	568.799	908.342	0	440.255	615.589	727.749	206.125	405.706	156.749	527.22	463.263	777.356	825.527	0	0	559.451	294.79	349.432	906.145	656.051	337.447	425.03	400.099	354.739	562.074	508.171	0	785.056	431.738	1606.97	331.893	1120.79
22866	Complement component C9	AIEDYINEFSVR	1454.75	32.846	0	0	0	0	0	0	0	160.977	12.392	0	0	31.554	0	0	0	0	0	159.964	149.464	0	0	0	0	0	0	0	0	0	0	0	0	0	199.81	0	0	9.371	9.18	0	0	364.123	349.46	0	0	0	0
15342	Complement factor B	ALFVSEEEKK	1178.62	24.225	78.4	0	116.359	326.041	0	0	52.656	41.258	0	101.871	133.017	67.983	0	0	130.073	0	0	60.981	0	19.236	0	0	0	0	0	65.065	62.964	39.386	49.519	28.5224	0	0	0	29.6816	0	0	0	0	0	0	0	24.013	0	0	41.489
17270	Complement factor B	VKDISEVVTPR	1241.69	24.894	0	0	0	0	0	0	0	0	0	93.981	430.848	297.55	0	82.238	0	0	0	0	0	0	0	0	0	0	0	0	0	0	0	0	0	0	0	0	0	0	0	0	0	0	0	0	0	0	0
19171	Complement factor B	EKLQDEDLGFL	1305.59	31.519	0	0	0	0	0	0	0	0	0	52.383	0	0	0	0	0	0	0	0	0	0	0	0	0	0	0	0	0	0	0	0	0	0	0	0	0	0	0	0	0	0	0	0	0	0	0
1351391	Complement factor B	EAGIPEFYDYDVALIK	1841.84	33.792	0	0	0	0	0	0	0	0	0	0	0	0	0	0	0	868.619	0	0	0	0	191.177	0	0	0	0	0	226.152	0	0	0	0	0	0	0	0	0	0	0	0	0	0	0	1309.14	0	0
16768	Cystatin-C	ALDFAVGEYNK	1225.52	31.72	0	0	0	0	0	0	0	0	0	0	0	0	0	0	0	0	1514.17	0	0	0	0	22.1468	0	0	0	0	0	0	0	0	0	0	0	0	0	0	0	0	0	0	0	0	0	0	0
29704	Cystatin-C	LVGGPMDASVEEEGVRR	1800	28.763	162.304	0	0	0	487.14	0	8.889	0	4.434	87.573	88.092	0	0	0	0	0	0	0	0	0	0	0	0	1413.6	0	0	0	0	6.473	0	0	86.716	0	0	0	33.904	0	0	0	0	0	0	100.494	0	13.552
33150	Cystatin-C	TQPNLDNcPFHDQPHLK	2001.87	24.116	14.454	0	0	0	0	0	339.753	359.553	297.308	195.893	0	123.131	136.666	121.041	29.569	0	0	107.281	39.447	283.631	382.899	0	0	0	140.815	9.521	191.797	0	57.701	19.2239	31.627	0	9.884	110.683	67.1858	0	0	0	22.082	0	247.62	159.771	68.67	0	363.982
1351202	Cystatin-C	LVGGPMDASVEEEGVR	1643.73	32.822	0	83.009	0	0	0	0	0	0	0	0	0	0	12.243	0	0	0	0	0	0	0	0	0	0	0	0	0	0	29.865	0	0	0	0	0	0	0	0	0	0	0	0	0	0	0	0	0
14591	Dickkopf-related protein 3	DQDGEILLPR	1154.55	30.049	4.23	58.97	0	41.295	0	0	0	0	0	0	0	0	0	0	0	0	0	0	0	0	0	0	0	0	0	0	0	0	0	0	0	0	0	0	0	0	0	0	0	0	0	0	0	0	87.831
23032	Dickkopf-related protein 3	SAVEEMEAEEAAAK	1463.55	31.87	0	0	83.807	0	0	0	0	13.735	0	0	0	0	0	0	0	0	0	0	0	0	0	0	0	0	0	0	0	0	0	0	0	0	0	0	0	0	0	0	0	0	0	0	0	0	0
23474	Dickkopf-related protein 3	EVEELMEDTQHK	1486.76	27.131	388.515	733.014	0	411.364	1469.4	0	234.578	187.087	7.734	255.446	0	0	0	981.628	0	0	87.6478	189.033	0	0	0	0	0	0	0	0	234.608	0	9.795	0	0	0	0	127.096	0	149.146	0	0	0	0	0	163.405	0	0	0
31748	Dickkopf-related protein 3	EVPDEYEVGSFMEEVR	1913.96	34.631	60.215	4.132	45.258	645.605	0	0	94.619	411.089	192.223	388.507	176.388	233.809	0	841.264	403.802	0	177.02	316.895	333.67	126.906	184.471	0	546.346	988.215	745.305	225.504	361.794	0	0	0	208.984	0	334.926	0	0	212.68	619.335	331.892	264.769	871.19	408.03	518.221	457.005	522.558	805.112
32648	Dickkopf-related protein 3	LLDLITWELEPDGALDR	1968.07	34.939	0	0	708.787	39.653	0	101.669	0	0	0	582.939	112.472	688.414	0	1706.02	0	0	0	0	0	15.692	0	0	810.315	1876.76	0	0	0	207.217	102.629	0	36.405	484.939	0	0	0	0	229.743	0	0	0	0	8.65	0	0	95.105
45210	Dickkopf-related protein 3	EVPDEYEVGSFMEEVRQELEDLER	2926.51	32.283	28.879	22.47	0	0	0	0	42.63	0	39.204	0	0	0	0	0	31.908	0	0	30.89	0	43.782	0	0	0	213.527	0	0	79.311	0	0	0	0	48.752	0	0	0	17.22	0	0	0	159.331	0	0	0	0	0
10828	Fibrinogen alpha chain	ALTDMPQMR	1061.58	30.007	0	0	0	0	0	0	14.891	0	65.753	0	0	33.501	0	0	0	0	0	0	0	0	0	0	0	0	0	0	0	0	0	0	11.126	131.564	48.944	0	0	26.325	0	0	0	0	0	0	0	0	0
23729	Fibrinogen alpha chain	MELERPGGNEITR	1500.81	26.617	75.47	0	0	0	0	0	0	0	4.346	0	0	0	0	0	0	0	0	0	0	40.917	0	45.2186	0	0	0	90.326	0	50.804	0	0	0	0	20.075	175.172	66.8361	44.547	0	0	0	0	0	33.788	0	0	12.911
24175	Fibrinogen alpha chain	GLIDEVNQDFTNR	1519.62	32.653	0	0	0	0	0	0	0	0	0	0	626.204	0	0	0	0	0	0	0	0	0	0	0	0	0	0	22.538	0	0	0	0	0	0	0	0	0	0	0	0	0	0	0	0	0	0	0
30972	Fibrinogen alpha chain	MADEAGSEADHEGTHSTK	1871.77	24.742	0	0	0	0	0	0	9.754	93.818	38.463	0	0	0	0	0	0	0	0	65.862	45.649	81.362	0	0	0	0	0	0	0	0	0	0	35.209	0	0	0	0	0	0	0	0	0	0	97.18	0	174.041	0
337	Fibrinogen beta chain	KWDPYK	835.459	23.965	0	0	0	0	0	0	3.514	0	0	0	0	0	0	0	0	0	0	0	0	0	0	0	0	0	0	0	0	0	0	0	3.928	0	0	0	0	2.372	0	0	0	0	0	0	0	0	0
9307	Fibrinogen beta chain	IRPFFPQQ	1031.57	29.959	24.042	5.457	0	189.147	0	122.004	0	0	0	0	0	0	0	0	0	0	0	0	0	0	0	0	0	0	0	0	0	20.223	0	0	0	0	0	0	0	0	0	0	0	0	0	0	0	0	0
19216	Fibrinogen beta chain	QGFGNVATNTDGK	1307.59	35.035	0	0	0	0	0	18.867	0	0	0	0	0	0	0	0	0	0	0	0	0	0	0	0	0	0	0	0	0	0	0	0	0	0	0	0	0	0	0	0	0	0	0	0	0	0	0
29061	Fibrinogen beta chain	DNENVVNEYSSELEK	1767.92	34.67	0	0	0	0	0	0	0	53.356	24.254	0	0	0	0	0	0	0	0	283.731	595.633	71.644	45.9446	0	0	0	56.0105	0	30.649	135.461	143.748	33.8738	129.565	45.957	0	92.4819	0	85.931	453.365	260.582	134.253	282.081	0	372.71	0	0	0
306	Fizzy-related protein homolog	ISKIPFK	831.464	23.43	0	0	0	0	0	0	9.677	13.037	6.788	9.901	16.556	0	0	0	30.397	0	0	36.991	12.142	19.629	0	0	0	0	0	26.639	22.896	15.157	38.919	0	21.721	0	27.601	0	0	3.299	0	0	0	0	0	0	0	0	31.04
32921	Fizzy-related protein homolog	AGANWSVNFHRINENEK	1985.02	21.968	0	0	0	0	0	0	0	0	0	0	0	0	0	0	0	0	0	0	0	0	0	0	0	0	0	0	0	0	0	0	0	0	63.202	0	0	0	0	0	0	0	0	0	0	0	0
2638	Gelsolin	RTPITVVK	912.517	22.179	0	0	0	0	0	0	0	0	0	0	0	0	0	0	0	0	0	0	0	0	0	0	0	0	0	0	0	0	0	0	0	0	0	0	0	0	56.194	0	0	0	0	0	0	0	0
17654	Gelsolin	AGKEPGLQIWR	1253.77	25.659	48.247	107.823	0	38	0	763.445	141.467	44.012	102.134	37.464	0	0	0	0	0	0	90.2684	82.648	0	81.901	83.5837	223.814	0	0	200.145	52.418	37.364	0	39.582	96.5652	192.594	0	52.576	284.405	0	103.718	0	0	0	0	0	0	0	0	0
18387	Gelsolin	HVVPNEVVVQR	1274.72	25.535	0	0	0	0	0	603.82	4.735	0	0	0	0	0	0	0	0	0	0	0	0	0	0	0	0	0	0	0	0	0	0	0	0	0	0	0	0	0	0	0	0	0	0	0	0	0	0
19491	Gelsolin	AGALNSNDAFVLK	1318.59	32.241	0	0	0	0	0	0	0	0	0	0	0	0	0	0	0	0	0	0	0	6.89	0	0	0	0	0	0	0	0	0	0	0	0	0	0	0	0	0	0	0	0	0	0	0	0	0
27133	Gelsolin	DSQEEEKTEALTSAK	1664.77	27.031	0	17.395	0	0	0	0	0	0	0	0	155.69	55.387	71.054	0	171.08	0	46.6605	159.873	0	25.093	0	0	0	0	0	0	0	0	230.29	0	0	0	1016.1	0	0	0	0	0	0	0	0	194.966	0	0	566.068
4622	Glutathione peroxidase 3	LFWEPMK	949.524	28.747	0	0	0	0	0	0	0	32.932	0	78.125	0	0	0	0	0	0	0	41.551	0	0	0	0	0	0	0	0	42.085	0	0	0	552.403	0	0	0	0	0	0	0	25.62	0	38.855	0	0	0	0
8964	Glutathione peroxidase 3	MDILSYMR	1027.56	29.36	0	0	0	9.136	0	63.983	0	19.307	12.284	31.67	0	0	0	0	0	0	0	38.321	0	12.815	0	0	0	0	0	0	0	0	0	15.9844	11.264	0	0	30.607	0	16.982	0	28.757	0	41.16	0	56.118	0	0	0
19386	Glutathione peroxidase 3	FLVGPDGIPIMR	1313.74	32.273	90.372	0	0	41.471	0	0	5.933	2721.14	470.126	0	0	0	34.301	56.121	170.034	0	48.8396	0	0	49.306	0	119.48	55.539	1467.83	0	0	0	0	0	0	0	0	266.281	0	0	535.069	232.712	0	0	0	0	175.594	0	0	0
24875	Glutathione peroxidase 3	QEPGENSEILPTLK	1553.83	33.456	0	0	0	0	0	0	0	759.362	129.557	304.615	124.173	367.174	0	770.916	0	0	367.849	540.756	904.841	184.115	0	0	0	0	0	0	0	0	316.096	0	365.173	428.175	414.71	0	0	152.373	634.804	508.526	212.255	979.953	786.186	603.272	1009.45	0	814.765
32433	Glutathione peroxidase 3	YVRPGGGFVPNFQLFEK	1954.09	29.131	0	0	0	0	0	0	0	0	0	0	0	0	0	0	0	0	0	0	0	0	0	0	0	0	0	0	0	0	0	0	0	0	0	0	0	0	0	0	0	0	0	0	0	0	0
41	Haptoglobin	DYAEVGR	808.411	28.237	7.523	0	0	0	0	0	9.373	0	0	0	0	0	0	0	0	0	0	0	0	0	0	0	0	0	0	0	0	0	0	0	0	0	0	0	0	0	0	0	0	0	0	0	0	0	0
3273	Haptoglobin	ILGGHLDAK	922.558	25.421	0	0	0	0	0	0	0	0	0	0	0	0	0	0	0	0	0	0	0	0	0	0	0	0	0	0	0	42.685	0	0	0	0	0	0	0	0	0	0	0	0	0	0	0	0	0
6326	Haptoglobin	VGYVSGWGR	979.552	29.566	28.939	0	0	0	134.945	0	137.644	0	29.097	248.033	0	0	0	0	0	0	0	0	0	0	0	0	0	0	0	0	0	0	0	0	41.242	0	48.711	0	0	0	0	0	0	0	0	135.366	0	0	0
14360	Haptoglobin	HYEGSTVPEK	1145.6	24.456	0	0	0	0	171.497	0	249.917	0	133.156	350.024	0	0	0	0	0	0	0	64.118	0	0	0	0	0	0	0	73.328	0	0	0	0	0	0	0	0	0	0	0	0	0	0	0	313.338	0	0	1192.91
18761	Haptoglobin	DIAPTLTLYVGK	1289.78	33.25	31.735	9.981	0	0	0	0	523.716	0	173.295	157.73	0	0	24.222	0	0	0	70.6779	81.502	65.247	0	354.443	0	0	0	41.9201	12.974	11.888	0	0	0	189.489	0	162.698	172.179	0	10.47	38.346	36.828	287.165	50.734	27.51	199.247	0	0	21.514
19271	Haptoglobin	TEGDGVYTLNDK	1310.57	31.526	0	148.528	0	0	0	0	0	0	0	0	0	0	0	0	0	0	0	0	0	0	0	0	0	0	0	0	0	0	0	0	0	0	0	0	0	0	0	0	0	0	0	0	0	0	0
22538	Haptoglobin	TEGDGVYTLNDKK	1438.76	26.598	201.279	76.063	0	0	0	0	94.086	0	55.067	177.116	0	0	0	0	0	0	0	0	0	0	0	0	0	0	0	0	0	0	0	0	0	0	0	0	0	0	0	0	0	0	0	0	0	0	0
22539	Haptoglobin	TEGDGVYTLNNEK	1438.72	32.763	0	0	0	0	0	226.969	9.966	0	0	808.626	0	0	0	0	0	0	184.699	395.437	627.53	0	0	0	0	0	0	0	0	0	0	0	330.226	235.065	299.056	0	0	28.577	0	624.036	296.715	120.304	134.003	1782.14	1054.33	0	1572.01
25429	Haptoglobin	LRTEGDGVYTLNDK	1579.86	27.308	275.658	189.12	0	0	0	0	180.994	9.171	186.9	294.559	0	0	0	0	0	0	0	0	0	0	163.554	0	0	0	0	0	0	0	0	0	0	0	0	82.8303	0	0	0	0	0	0	0	0	0	66.1835	528.467
34775	Haptoglobin	SPVGVQPILNEHTFcAGMSK	2113.13	31.391	0	0	0	0	0	0	8.777	0	0	0	0	0	0	0	15.257	0	0	8.548	95.032	5.245	0	0	0	0	0	0	0	0	0	0	0	0	0	0	0	0	0	188.567	0	0	0	6.369	0	0	0
1351207	Haptoglobin	YVMLPVADQDQcIR	1648.68	33.418	0	0	0	0	0	0	0	0	0	0	0	0	0	0	0	0	0	0	0	0	0	0	0	0	0	0	0	0	0	0	0	0	0	0	0	0	0	0	0	0	0	0	0	0	1575.84
3689	Hemoglobin subunit beta	SAVTALWGK	931.449	28.576	0	0	0	0	0	0	12.043	67.824	0	21.657	0	0	0	55.515	20.695	0	0	0	0	0	0	0	0	0	0	0	0	0	0	0	0	0	0	0	0	0	0	0	0	0	0	0	0	0	42.391
14477	Hemoglobin subunit beta	VVAGVANALAHK	1148.71	24.654	0	0	0	0	0	0	0	944.381	134.288	0	0	0	0	0	0	0	0	0	0	160.986	0	0	0	0	0	0	0	0	0	20.8729	0	0	0	0	0	0	0	0	0	0	0	0	168.834	0	0
19383	Hemoglobin subunit beta	VNVDEVGGEALGR	1313.62	32.195	0	0	0	0	0	0	0	0	0	0	0	0	0	0	0	0	0	0	0	0	0	0	0	0	0	0	0	0	0	3442.58	0	0	0	0	0	0	0	0	0	0	0	196.195	87.291	0	0
34053	Hemoglobin subunit beta	FFESFGDLSTPDAVMGNPK	2058.09	35.179	0	0	0	0	0	0	5.081	1191.39	0	0	0	0	16.14	0	0	0	0	150.458	361.604	0	0	0	0	0	0	163.54	0	0	0	5134.76	0	0	340.085	0	0	0	0	309.484	345.819	145.603	147.343	142.81	0	0	0
81	Hemopexin	LHImAGR	812.486	23.497	3.465	0	0	0	0	0	5.457	0	4.742	5.494	0	0	0	0	0	0	0	0	0	0	0	0	0	0	0	0	0	0	0	0	0	0	0	0	0	2.879	0	0	0	0	0	0	0	0	0
5348	Hemopexin	VDGALcMEK	963.46	30.245	0	0	0	0	0	0	0	0	0	209.772	696.971	594.793	0	0	0	0	0	0	0	0	0	0	0	0	0	0	0	0	0	0	0	608.436	0	0	0	0	171.109	755.099	0	0	0	0	0	0	0
8395	Hemopexin	VWVYPPEK	1016.57	29.674	94.063	137.207	0	0	0	0	182.165	1161.02	207.331	121.689	130.629	69.128	0	197.934	254.07	0	0	443.712	262.889	90.521	93.6714	0	227.946	0	219.6	149.225	360.506	484.238	183.585	143.168	371.166	75.85	303.296	238.412	0	107.822	526.209	453.633	174.507	520.003	439.737	241.114	0	40.8392	430.245
13593	Hemopexin	RLWWLDLK	1128.69	23.192	0	0	0	0	0	0	218.323	0	49.178	0	0	0	0	0	0	0	258.491	182.879	47.12	183.063	89.4217	98.6084	0	0	0	0	0	0	0	0	427.062	0	0	37.6733	0	51.36	0	0	171.639	0	129.343	27.451	0	0	0
14225	Hemopexin	GGYTLVSGYPK	1140.64	30.98	725.097	372.751	0	0	0	0	273.544	0	984.1	621.77	1010.93	1346.11	138.059	131.655	1031.51	0	0	715.488	522.651	0	500.837	267.354	330.691	0	0	527.371	0	0	903.039	0	804.016	1308.52	923.116	0	0	0	0	0	742.892	0	353.811	426.194	778.421	0	174.166
14246	Hemopexin	QGHNSVFLIK	1141.67	23.919	305.283	0	133.614	217.817	0	77.806	0	359.44	0	405.85	0	487.015	237.982	380.039	0	955.228	304.692	288.272	331.2	201.526	0	150.449	0	336.773	0	193.668	318.721	73.157	0	0	330.19	0	245.147	251.95	0	0	0	238.603	220.701	0	816.131	310.522	0	0	0
14343	Hemopexin	VWVYPPEKK	1144.68	24.039	116.739	21.262	0	0	0	0	0	0	0	0	259.506	0	0	0	0	0	0	0	25.916	0	0	0	0	0	0	0	0	0	0	0	10.707	0	64.227	0	0	77.779	0	0	0	0	42.077	0	263.398	0	0
19455	Hemopexin	GDKVWVYPPEK	1316.67	25.304	50.623	142.156	0	132.057	0	0	160.92	498.351	304.875	343.067	90.787	192.084	0	322.165	502.449	3553.21	144.399	327.469	600.287	222.003	168.566	193.108	0	415.511	678.56	1550.63	754.691	409.233	380.856	559.801	224.33	0	196.155	303.666	317.016	255.42	0	0	170.315	222.621	368.782	350.584	255.89	237.395	482.718
23423	Hemopexin	EWFWDLATGTMK	1483.63	32.517	0	0	0	0	0	0	0	0	0	0	0	0	0	0	0	0	0	0	0	0	0	0	0	0	0	0	0	0	0	0	0	0	0	0	0	0	0	0	0	0	0	0	0	0	0
24458	Hemopexin	WKNFPSPVDAAFR	1533.85	26.644	0	0	0	0	0	0	0	0	0	0	0	0	0	0	0	0	0	0	0	0	0	0	0	0	0	0	0	0	0	0	0	0	0	0	0	3.418	0	0	0	0	0	0	0	0	0
30333	Hemopexin	SGAQATWTELPWPHEK	1837	28.277	1867.75	1513.67	514.081	630.85	0	0	754.884	841.087	971.585	1484.38	1808.71	1449.66	2549.78	1219.49	946.885	0	1165.22	0	0	738.542	1123.51	1029.93	1883.52	759.12	0	1535.64	1026.68	1446.38	720.824	587.746	892.172	1142.56	0	1122.05	1006.5	424.06	388.214	82.526	0	0	0	1231.59	938.557	815.073	1015.03
37821	Hemopexin	LLQDEFPGIPSPLDAAVEcHR	2305.25	31.095	87.013	12.899	0	0	0	0	24.445	0	28.938	0	0	0	0	0	0	0	0	94.009	30.822	71.54	0	0	0	222.711	0	0	0	0	0	0	20.361	0	0	15.8712	0	48.324	0	53.752	69.181	0	0	62.472	0	0	0
39734	Hemopexin	EVGTPHGIILDSVDAAFIcPGSSR	2439.29	31.096	5.817	0	0	0	0	0	71.204	156.179	11.229	0	0	0	0	0	0	0	0	0	92.109	0	0	0	0	0	0	0	0	0	0	0	17.309	0	0	0	0	0	0	0	0	0	59.526	211.489	0	0	0
1350900	Hemopexin	YYcFQGNQFLR	1436.59	32.026	0	0	0	0	0	0	0	0	0	0	0	0	0	0	53.902	0	0	0	0	0	0	99.5591	0	0	0	549.243	511.281	933.773	0	0	0	0	0	0	0	0	0	0	0	0	0	0	169.834	0	0
11619	Heparin cofactor 2	NYNLVESLK	1078.52	32.28	15.29	12.551	0	0	0	0	1.504	0	0	0	0	0	0	0	0	0	0	4.865	0	0	0	0	0	0	0	0	0	0	0	0	15.376	0	10.837	0	0	0	0	46.315	0	0	0	0	0	0	0
1349689	Heparin cofactor 2	TLEAQLTPR	1027.58	31.535	5.02	0	0	8.594	0	0	0	0	0	0	0	0	0	0	0	0	0	0	0	0	0	0	0	0	0	0	0	0	0	0	0	0	0	0	0	0	0	0	0	0	0	0	0	0	0
13456	Histidine-rich glycoprotein	DGYLFQLLR	1123.61	31.286	0	122.832	0	0	0	0	1.697	80.654	0	0	0	0	16.979	0	0	0	0	11.405	0	0	0	0	0	0	0	0	0	0	0	0	0	0	0	0	0	0	0	22.07	40.223	0	0	0	0	0	0
27456	Histidine-rich glycoprotein	DSPVLIDFFEDTER	1681.68	33.811	0	0	0	0	0	0	0	0	0	0	0	0	0	0	0	0	0	0	0	0	0	0	0	0	263.486	0	0	0	0	0	0	0	0	0	138.467	0	0	0	0	0	0	0	0	0	0
1899	Ig alpha-1 chain C region	YLTWASR	895.502	28.551	0	0	25.233	0	0	0	0	0	8.172	0	0	0	0	65.854	313.455	0	0	40.568	0	14.54	0	0	0	0	0	0	0	0	0	0	34.361	0	119.432	0	0	9.28	0	0	14.335	0	0	0	0	0	0
24572	Ig alpha-1 chain C region	DASGVTFTWTPSSGK	1539.8	33.692	0	0	46.644	0	0	0	1.248	0	0	0	0	0	0	50.865	0	0	0	0	0	0	0	0	46.458	0	0	220.212	0	0	0	0	0	594.594	0	0	245.825	14.242	0	102.222	0	733.975	0	0	258.232	0	0
16316	Ig alpha-2 chain C region	WLQGSQELPR	1212.67	31.117	1280.2	580.186	0	413.728	0	0	313.919	717.441	345.92	206.095	371.733	262.127	0	80.415	703.591	0	253.305	407.883	624.471	226.52	1072.53	877.125	0	0	0	34.252	0	0	381.877	234.803	332.869	0	1204.11	767.573	474.711	566.585	680.392	242.258	468.556	499.99	449.158	461.017	1102.27	397.44	891.253
24021	Ig alpha-2 chain C region	DASGATFTWTPSSGK	1511.61	32.535	0	0	0	0	0	0	0	0	0	0	0	0	0	0	0	0	0	0	0	0	0	0	0	0	0	58.531	23.894	0	0	0	0	0	0	0	0	0	0	0	0	0	0	0	0	0	0
30280	Ig alpha-2 chain C region	QEPSQGTTTFAVTSILR	1834.87	34.418	0	0	0	0	0	0	0	0	0	0	0	0	0	0	0	0	0	0	0	0	1409.12	1274.14	0	0	0	20.3	0	0	0	0	0	0	0	0	0	0	0	0	0	0	0	0	0	0	0
1349037	Ig alpha-2 chain C region	SAVQGPPER	939.502	31.862	0	0	0	0	0	0	0	12.35	78.763	0	0	0	0	23.098	0	0	0	0	16.036	0	0	0	0	0	0	0	0	0	0	0	0	0	0	0	0	10.045	0	38.779	0	0	0	0	0	0	0
329	Ig gamma-1 chain C region	DTLMISR	834.481	29.298	10.657	23.867	0	0	0	0	73.7	0	45.653	100.521	118.419	39.859	114.525	0	188.818	0	0	38.809	23.603	101.786	0	0	24.945	0	0	223.741	64.998	13.757	115.388	0	35.677	62.327	92.952	0	0	81.723	62.729	23.154	35.742	57.129	0	0	55.867	0	225.684
621	Ig gamma-1 chain C region	DTLmISR	850.481	29.246	1.257	14.037	0	0	0	0	43.487	26.24	8.133	17.113	27.944	0	47.062	20.864	74.072	0	0	20.733	19.316	11.186	0	0	0	0	0	20.852	19.521	0	16.946	0	29.449	139.864	67.107	0	0	8.888	30.447	15.869	14.253	97.778	26.224	0	28.489	0	124.012
15586	Ig gamma-1 chain C region	GPSVFPLAPSSK	1185.68	31.364	994.723	3965.3	0	0	3822.07	136.807	1907.47	663.919	1339.31	2932	2531.61	2742.11	2111.51	2559.4	4063.29	561.918	0	2897.8	3027.5	2211.09	0	3927.02	0	1932.63	0	4454.88	1024.11	0	2751.88	0	2780.94	2721.89	4765.23	3.6952	0	2141.46	4515.97	3872.09	2312.49	2375.03	2135.99	3563.52	4403.85	0	4318.44
18656	Ig gamma-1 chain C region	EPQVYTLPPSR	1285.72	32.133	3090.18	7073.24	6442.52	8833.23	399.909	809.057	1821.3	1429.47	2137.08	1909.19	3166.48	2739.74	3406.52	0	6665.13	0	0	4360.38	4778.85	5004.75	0	0	0	1988.52	0	2522.04	1997.21	861.477	4190.55	0	3104.36	2995.2	5467.73	0	0	2305.3	5471.54	5489.85	3120.64	2650.11	5939.44	4371.23	2981.08	0	8694.71
27354	Ig gamma-1 chain C region	FNWYVDGVEVHNAK	1676.88	26.958	2494.88	3567.78	348.008	1376.53	0	259.334	1898.91	611.043	1188.32	2726.22	1178.79	1317.84	2496.13	1183.36	2694.74	0	1846.51	1309.6	1491.01	3059.17	3041.03	7052.05	694.824	706.697	3877.38	6414.73	1443.94	0	1575.09	4579.1	1230.76	1443.37	1330.06	3743.02	3349.46	2143.93	0	2351.15	1440.55	647.756	1583.71	1461.45	1662.37	2851.26	1003.58
29597	Ig gamma-1 chain C region	VVSVLTVVHQDWLNGK	1793.08	28.57	680.388	1108.21	0	0	0	0	122.129	0	57.814	0	0	0	0	0	0	0	515.557	422.4	0	849.832	77.6762	0	0	0	0	0	0	0	0	117.756	207.446	0	147.404	0	0	283.883	0	0	996.685	0	0	86.557	0	0	0
29817	Ig gamma-1 chain C region	VVSVLTVLHQDWLNGK	1807.09	28.103	1305.55	401.048	0	170.906	0	0	1034.64	0	91.296	0	0	0	0	0	0	0	671.066	549.103	0	497.027	0	0	0	0	0	518.907	0	0	0	870.934	293.763	0	370.05	1288.35	0	404.8	0	0	703.398	0	0	0	0	0	14.861
30976	Ig gamma-1 chain C region	EPQVYTLPPSRDELTK	1872.06	29.327	1100.34	0	0	391.636	0	0	387.386	0	0	1079.47	0	552.868	97.888	0	2744.74	0	0	0	0	0	0	0	0	731.492	653.047	1500.29	0	0	183.447	801.087	13.12	0	185.701	1227.42	2706.74	1348.55	0	0	0	0	0	0	1491.57	0	567.95
31512	Ig gamma-1 chain C region	TTPPVLDSDGSFFLYSR	1900.99	34.578	67.178	0	335.593	775.574	0	0	54.729	1117.33	204.106	20.518	823.245	35.761	0	0	0	0	318.868	12.075	196.147	219.785	0	1557.22	595.468	0	0	1544.45	1249.07	0	349.776	0	40.78	1547.68	972.337	440.505	0	16.314	78.128	150.96	0	2254.45	964.14	5.577	1786.38	785.87	0
31550	Ig gamma-1 chain C region	EPQVYTLPPSREEMTK	1904.05	29.259	837.253	3149.74	0	0	0	73.243	296.277	0	690.316	520.682	1914.74	372.366	0	0	535.448	0	0	15.176	0	82.647	1859.23	1788.99	0	0	385.841	58.515	0	0	0	320.959	0	770.853	0	679.636	128.4	1436.92	0	23.777	75.66	0	0	15.578	1389.04	507.546	0
41144	Ig gamma-1 chain C region	GFYPSDIAVEWESNGQPENNYK	2543.26	37.961	14.416	0	0	0	0	0	0	0	0	0	0	0	0	0	0	0	0	0	0	0	0	0	0	0	0	0	0	0	0	0	0	0	0	0	0	0	0	0	9.541	0	0	0	0	0	0
199	Ig gamma-2 chain C region	GLPAPIEK	823.544	28.5	13.713	24.609	70.585	6.05	686.079	35.716	0	181.689	33.4	75.405	109.393	113.611	50.537	210.833	257.273	0	0	65.094	73.912	47.838	0	0	84.04	336.615	0	0	0	120.753	63.144	0	10.636	59.325	23.306	0	0	0	0	28.714	25.39	54.411	98.177	31.956	164.256	0	190.845
1350511	Ig gamma-2 chain C region	GPSVFPLAPcSR	1228.57	32.116	0	0	0	0	0	0	0	0	5.738	0	0	0	0	0	205.545	0	0	0	0	0	0	0	60.089	0	206.137	0	31.515	0	0	212.91	0	0	0	0	0	0	0	0	0	0	0	0	0	0	0
11301	Ig gamma-3 chain C region	ScDTPPPcPR	1069.5	29.958	0	0	0	0	0	0	0	0	0	0	0	0	0	0	463.543	0	0	0	0	0	0	0	591.789	0	0	0	1027.55	0	0	0	0	0	0	0	0	0	0	0	0	775.497	87.166	0	0	0	0
12584	Ig gamma-3 chain C region	NQVSLTcLVK	1102.51	29.966	0	0	0	0	0	0	0	0	0	0	0	0	47.863	0	0	0	0	0	0	0	0	0	0	0	0	0	0	0	0	0	0	0	0	0	0	0	0	0	0	0	0	0	0	0	0
17893	Ig gamma-3 chain C region	STSGGTAALGcLVK	1262.57	31.753	0	2.843	0	0	0	0	0	0	0	0	949.593	0	0	0	0	0	0	0	0	0	0	0	0	0	0	0	0	1364.93	0	0	643.983	0	0	0	0	0	0	0	0	0	0	0	428.193	0	0
22087	Ig gamma-3 chain C region	WYVDGVEVHNAK	1415.75	26.172	2.178	5.226	0	0	0	1161.67	81.107	224.043	0	0	83.931	0	0	0	0	0	0	0	0	98.279	0	203.868	0	0	0	67.288	0	0	0	0	0	0	0	74.943	0	1.737	0	0	0	0	0	0	0	0	0
9203	Ig heavy chain V-III region GAL	GLEWVANIK	1028.56	30.199	0	0	0	0	526.644	577.843	0	0	0	0	0	0	0	0	0	0	0	0	0	0	0	0	0	0	0	0	13.543	0	3.183	0	0	0	0	0	0	0	0	0	0	0	0	0	0	0	33.922
20004	Ig heavy chain V-III region GAL	NSLYLQMNSLR	1337.6	31.423	0	0	0	0	0	0	0	0	0	0	0	0	0	0	0	0	0	0	0	0	0	0	0	0	0	0	0	0	0	0	0	0	0	0	0	0	0	0	0	0	0	45.471	0	0	0
20286	Ig heavy chain V-III region GAL	NTLYLQMNSLR	1351.7	32.038	0	26.894	0	0	0	0	243.513	170.64	64.911	0	0	0	0	323.07	0	0	25.6228	218.257	0	234.119	0	0	0	0	253.794	0	0	0	0	0	0	0	0	85.3645	0	0	0	0	0	0	0	0	0	90.514	0
23738	Ig kappa chain C region	DSTYSLSSTLTLSK	1501.68	32.885	0	0	0	0	0	0	0	0	0	0	0	0	0	0	0	0	0	0	0	0	0	0	0	0	0	0	0	0	0	0	0	0	0	0	0	0	0	0	0	0	0	0	0	0	0
28632	Ig kappa chain C region	SGTASVVcLLNNFYPR	1738.91	34.109	0	0	0	0	0	0	10.134	0	0	0	0	0	0	0	0	0	0	0	145.322	0	0	0	0	0	0	56.931	0	0	0	0	40.641	53.317	14.542	0	0	0	26.476	15.349	0	0	0	0	0	0	0
29984	Ig kappa chain C region	VYAcEVTHQGLSSPVTK	1816.93	29.074	0	0	0	0	0	0	228.868	0	401.994	285.245	251.727	0	52.681	872.458	451.88	1543.35	0	107.539	0	112.999	0	0	0	281.292	0	416.328	14.596	0	429.594	508.538	47.859	456.313	180.703	171.127	200.659	485.907	0	27.009	0	79.447	464.951	179.047	636.409	248.395	530.008
32280	Ig kappa chain C region	TVAAPSVFIFPPSDEQLK	1944.99	35.239	0	0	0	0	0	0	0	0	5.789	0	0	0	0	0	0	0	0	0	20.572	0	0	0	0	0	0	0	0	0	0	0	0	0	0	0	0	0	0	0	5.264	0	0	0	0	0	0
49861	Ig kappa chain C region	VDNALQSGNSQESVTEQDSKDSTYSLSSTLTLSK	3618.96	34.843	0	1245.87	0	0	0	0	342.234	91.683	211.717	654.35	561.326	801.412	0	0	848.335	0	0	138.712	38.679	1809.7	0	35.8114	474.533	0	0	1415.45	306.526	531.761	49.566	0	72.267	568.39	195.407	0	450.519	1721.07	0	139.151	499.339	924.391	403.009	43.56	530.057	0	61.659
12056	Ig kappa chain V-I region EU	ASSLESGVPSR	1088.56	32.466	0	0	0	0	0	0	0	0	0	0	0	0	0	0	0	0	0	0	51.379	0	0	0	0	0	0	0	0	0	0	0	0	0	0	0	0	0	0	0	0	0	0	0	0	0	0
1351451	Ig kappa chain V-I region EU	DIQMTQSPSTLSASVGDR	1891.97	32.861	0	0	0	0	0	0	0	26.829	17.636	0	53.201	0	0	0	0	0	0	0	0	0	0	0	0	321.658	0	0	0	0	34.672	0	0	0	0	0	0	16.604	0	0	0	0	0	0	0	0	0
7009	Ig lambda-2 chain C regions	AGVETTTPSK	989.56	30.134	109.988	135.041	0	8.916	0	0	167.288	124.2	96.506	163.144	117.94	0	0	0	261.688	0	0	106.64	92.25	108.43	0	0	0	532.321	0	140.335	356.163	137.331	31.826	0	48.476	98.637	202.14	0	0	139.965	107.285	0	0	1497.66	0	100.959	220.193	0	150.556
26936	Ig lambda-2 chain C regions	SYScQVTHEGSTVEK	1652.85	27.193	0	262.65	0	0	0	0	0	0	0	0	0	0	0	0	0	0	0	0	0	0	0	0	0	0	0	0	0	0	0	0	0	0	0	0	0	0	0	0	0	0	0	0	0	0	0
32925	Ig lambda-2 chain C regions	AAPSVTLFPPSSEELQANK	1985.11	35.012	1218.26	2145.86	0	2253.12	0	0	1166.17	689.242	1382.77	1508.86	2068.03	1934.56	2152.85	2207.53	1555.02	0	0	1234.16	2170.7	2217.73	0	0	1289.63	1150.12	5178.01	2805.34	1841.12	0	961.006	0	1298.44	1520.74	2911.85	0	2270.5	3827.28	5510.46	2962.42	2643.46	2489.72	1565.6	1426.11	4081.9	1992.41	4120.56
4963	IgGFc-binding protein	TPDGSLLVR	956.582	29.16	0	0	0	0	0	0	0	0	0	0	0	0	0	0	0	0	0	0	0	0	0	0	0	0	0	0	0	0	0	0	0	0	0	0	0	0	0	0	0	0	0	0	0	0	0
5279	IgGFc-binding protein	VTVNGVDMK	961.474	29.973	0	0	0	1087.8	0	477.598	0	0	0	0	0	0	0	0	0	0	0	0	0	0	0	0	0	0	0	0	0	1483.86	0	0	0	0	0	0	0	0	0	0	0	0	0	0	0	0	0
5519	IgGFc-binding protein	GSQAVSYTR	967.466	28.594	0	2.962	0	0	0	0	0	0	0	0	0	0	0	0	0	0	0	0	0	0	0	0	0	0	0	0	25.657	0	0	0	0	0	0	0	0	0	0	0	0	0	0	0	0	0	0
7539	IgGFc-binding protein	GSQTVSYTR	997.551	29.105	0	0	0	0	0	102.433	0	0	0	0	0	0	0	0	36.86	0	0	0	0	6.626	0	0	0	0	0	0	0	0	0	0	0	0	0	0	0	0	0	0	0	0	0	0	0	0	0
15345	IgGFc-binding protein	LPVVLANGQIR	1178.63	31.386	150.609	150.907	3918.69	253.685	0	0	53.632	312.348	140.704	241.885	684.438	559.927	4035.15	0	0	2307.8	27.6765	116.468	0	97.722	713.945	41.6573	342.131	2053.7	0	0	174.799	6826.05	0	0	187.581	0	152.136	0	0	0	578.932	164.447	316.011	2032.07	244.349	314.807	615.243	285.399	778.942
464	Immunoglobulin lambda-like polypeptide 5	VTVLGQPK	840.533	29.652	0	0	0	0	0	0	11.847	0	2.915	0	0	0	0	0	0	0	0	0	0	0	0	0	0	0	0	396.656	0	0	0	0	0	0	0	0	0	6.974	0	0	0	0	0	0	0	0	0
28696	Immunoglobulin lambda-like polypeptide 5	YAASSYLSLTPEQWK	1742.77	33.662	0	0	0	0	0	0	0	0	0	0	0	0	0	0	0	0	0	0	0	0	0	0	0	0	0	0	0	0	0	0	0	0	0	4640.12	0	0	0	0	0	0	0	0	0	4833.3	0
33843	Immunoglobulin lambda-like polypeptide 5	ANPTVTLFPPSSEELQANK	2042.13	35.096	333.12	589.343	370.561	154.21	0	0	465.752	297.908	331.996	472.139	0	309.027	0	511.26	633.687	0	610.179	616.134	688.01	598.091	1333.49	443.968	545.761	161.496	1101.85	748.051	522.259	64.922	445.229	769.502	884.265	822.486	1433.78	785.282	474.175	1067.16	1604.75	460.282	839.812	1122.81	455.111	650.045	804.719	852.613	801.449
15086	Inter-alpha (Globulin) inhibitor H2	SSALDMENFR	1168.57	30.575	0	0	0	0	0	0	39.223	0	27.166	17.339	0	0	0	0	40.465	0	0	0	24.476	23.075	0	0	0	0	0	0	0	26.598	0	18.765	0	0	61.906	29.6892	0	30.587	0	0	0	0	81.854	36.835	42.909	33.949	98.964
19958	Inter-alpha (Globulin) inhibitor H2	FYNQVSTPLLR	1336.74	32.852	0	0	0	0	0	0	35.878	207.002	3.217	0	0	0	31.126	0	0	0	18.5579	93.054	0	7.412	0	12.3962	0	155.071	0	0	0	0	0	0	0	0	43.855	0	0	38.589	0	0	0	73.768	0	134.136	0	0	0
14735	Inter-alpha-trypsin inhibitor heavy chain H1	AAISGENAGLVR	1156.62	31.366	90.598	65.04	0	253.095	0	0	122.796	249.401	137.064	144.602	243.766	323.358	698.886	383.853	266.913	0	36.2912	142.392	448.65	58.767	0	78.6028	215.926	379.101	359.236	98.577	124.706	1880.23	279.824	194.127	0	169.008	140.9	11.456	192.994	84.013	273.998	33.805	12.734	487.502	129.382	262.736	391.551	204.265	585.867
14801	Inter-alpha-trypsin inhibitor heavy chain H1	EVAFDLEIPK	1159.62	30.979	232.108	94.521	340.858	0	0	0	747.164	0	0	0	0	0	0	0	0	0	0	0	0	844.933	0	0	0	145.506	0	0	6.424	0	0	0	0	0	0	0	0	870.824	0	0	0	0	0	0	0	0	0
16596	Inter-alpha-trypsin inhibitor heavy chain H1	GHMLENHVER	1220.66	21.032	5.199	0	0	0	0	0	22.814	0	19.844	0	0	0	0	0	0	0	0	0	0	14.685	0	0	0	0	0	0	0	0	10.991	0	0	0	0	0	0	6.578	0	0	0	0	0	0	0	0	0
1162	Inter-alpha-trypsin inhibitor heavy chain H4	GSEMVVAGK	876.49	28.892	1.372	0	0	0	0	0	0	0	0	0	0	0	0	0	0	0	0	0	0	0	0	0	0	0	0	45.631	88.922	38.571	2.85	0	0	18.453	0	0	0	0	0	0	0	15.289	0	0	0	0	0
14283	Inter-alpha-trypsin inhibitor heavy chain H4	GPDVLTATVSGK	1143.63	32.094	0	0	0	0	0	0	0	0	0	0	0	0	0	0	0	0	0	0	0	0	0	14.8096	0	0	0	0	0	0	0	0	0	0	0	0	0	27.322	0	0	0	0	0	0	0	0	0
3671	Kininogen-1	DFVQPPTK	930.5	28.892	1.81	0	12.236	0	0	1318.42	0	230.394	0	0	0	0	0	0	0	0	0	0	0	0	0	0	0	0	0	0	0	0	0	0	0	0	0	0	0	0	0	0	0	0	0	0	0	0	0
10678	Kininogen-1	RPPGFSPFR	1059.53	23.296	0	0	0	16.408	0	0	0	0	0	0	0	0	0	0	0	0	0	0	0	0	0	0	0	221.257	0	0	0	0	0	0	0	0	0	0	0	0	0	0	0	0	0	0	63.107	62.7595	0
12786	Kininogen-1	AATGEcTATVGK	1106.46	29.599	0	3.94	0	0	0	0	0	0	0	0	0	0	0	0	0	0	0	0	0	0	0	0	0	0	0	0	0	0	0	0	0	0	0	0	0	0	0	0	0	0	0	0	0	0	139.715
17511	Kininogen-1	TVGSDTFYSFK	1250.57	33.76	21.913	21.515	0	0	0	0	0	0	0	0	0	0	0	0	0	0	0	0	0	0	0	0	0	0	0	0	0	0	0	0	0	0	0	0	0	3.2	0	0	0	0	0	0	0	0	0
24027	Kininogen-1	IGEIKEETTSHLR	1511.78	24.457	0	0	0	0	0	0	0	9.154	0	0	0	0	0	0	0	0	0	0	0	0	0	0	0	0	0	0	0	0	0	0	0	0	0	0	0	7.334	0	0	0	0	0	0	0	0	0
31001	Kininogen-1	YNSQNQSNNQFVLYR	1873.94	33.909	0	42.17	0	0	0	0	0	119.284	0	0	266.121	0	0	0	0	0	0	0	0	0	0	114.094	0	0	0	0	0	146.336	0	0	0	0	0	111.592	0	0	0	0	0	0	0	157.044	0	0	0
6978	Leucine-rich alpha-2-glycoprotein	VAAGAFQGLR	988.571	29.515	0	0	0	22.177	0	57.573	118.274	0	151.74	0	0	356.611	0	0	102.47	0	0	0	0	90.628	0	0	935.622	0	0	120.524	0	155.414	28.795	0	0	0	0	0	0	0	0	0	0	0	0	27.563	0	0	98.63
15344	Leucine-rich alpha-2-glycoprotein	DLLLPQPDLR	1178.62	33.954	0	16.707	0	0	0	0	0	0	0	0	0	0	0	0	0	0	0	0	0	0	0	0	0	0	0	0	0	0	0	0	0	0	0	0	0	0	0	0	0	0	0	0	0	0	0
12938	Neuroblast differentiation-associated protein AHNAK	VSAPEVSVGHK	1108.56	24.404	0	0	67.125	0	0	0	0	0	0	0	0	0	0	0	0	0	0	0	0	0	0	0	0	0	0	0	0	0	0	0	0	0	0	0	0	0	0	0	0	0	0	0	0	0	0
16239	Neuroblast differentiation-associated protein AHNAK	GEGPDGDVKLPK	1210.59	24.38	0	0	58.679	39.784	499.353	0	0	0	0	0	0	0	0	0	0	0	0	0	0	0	0	0	0	0	0	0	0	0	0	0	0	0	0	0	0	0	0	0	0	0	0	0	0	0	0
25327	Neuroblast differentiation-associated protein AHNAK	ISmPDVDFNLKGPK	1575.9	27.265	145.535	46.099	0	0	0	0	65.965	0	23.642	0	0	73.919	0	0	0	0	0	25.742	0	23.607	0	0	0	0	0	0	0	0	0	0	27.877	0	0	0	0	16.366	0	0	0	0	0	0	0	0	0
34124	Neuroblast differentiation-associated protein AHNAK	AEASIQAGAGDGEWEESEVK	2062.07	35.126	0	11.94	0	0	0	0	0	85.321	2.725	0	0	0	0	0	0	0	0	0	0	0	0	0	94.166	0	0	0	0	0	0	0	14.329	0	5.012	0	0	7.481	0	0	0	0	0	0	0	0	0
471	Obscurin	LVVQQAGK	841.556	28.536	244.347	256.404	1158.91	60.027	10001.3	697.814	491.54	2363.09	175.397	1001.07	1167.88	1353.51	757.322	2691.51	3049.61	31037.7	0	667.443	662.605	216.795	0	0	893.632	14975.1	0	0	765.143	2785.71	716.641	0	251.516	842.168	428.314	0	0	110.864	260.242	256.894	251.602	533.997	829.978	631.711	2093.35	0	1731.48
5237	Obscurin	DGVELTDGR	960.497	28.542	0	0	0	0	0	0	0	0	0	0	0	0	0	0	39.516	0	0	22.509	0	10.751	0	0	0	0	0	0	0	0	0	0	0	0	0	0	0	0	0	0	0	0	0	0	0	0	0
695	Opticin	TAYLYAR	856.471	28.398	0	3.715	0	0	0	0	0	0	0	0	0	0	0	0	0	0	0	0	0	0	0	0	0	0	0	0	0	124.859	64.529	0	0	0	0	0	0	0	0	0	0	0	0	0	0	0	0
5244	Opticin	REEQmPR	960.511	24.406	315.537	510.071	340.613	619.61	1319.5	746.795	935.063	122.858	271.99	1309.78	1807.87	667.271	337.139	670.437	830.402	580.559	0	128.173	0	148.08	0	0	424.361	0	0	688.281	349.118	151.153	384.954	0	131.569	510.93	189.192	0	0	424.115	0	0	58.952	164.076	0	29.249	204.004	0	1186.98
17857	Opticin	EGDSFEVLPLR	1260.67	32.019	83.852	163.212	79.072	0	0	462.086	10.26	426.634	16.127	168.015	0	0	0	388.759	60.976	999.403	0	0	0	65.197	0	46.0298	0	1505.02	0	0	0	0	0	0	0	0	0	34.773	0	0	0	77.836	0	0	0	130.617	0	0	548.053
18347	Opticin	LQSSGIQPAAFR	1273.71	31.929	168.242	0	0	0	0	856.492	0	0	0	196.568	0	0	0	0	0	0	0	0	0	0	0	0	0	2740.35	0	0	0	0	0	0	0	0	0	0	59.8932	0	0	0	0	0	0	0	51.591	0	0
27470	Opticin	SVHLQNNLIETMQR	1681.98	27.584	0	0	0	0	0	0	0	0	0	0	0	0	0	0	0	0	0	0	0	30.982	0	0	0	2521.05	0	0	0	0	0	0	0	0	0	0	0	15.573	0	0	0	0	0	0	0	0	0
31588	Opticin	IDLSNNLISSIDNDAFR	1906.03	35.024	0	0	0	70.335	0	0	0	0	17.852	155.644	0	0	0	0	0	0	0	0	0	0	0	0	0	0	0	0	0	0	6.302	0	886.377	0	0	0	0	0	39.193	0	0	0	0	0	0	0	0
21391	Osteopontin	ISHELDSASSEVN	1386.72	32.843	5.349	0	431.293	0	0	0	0	0	35.656	125.259	21.012	0	0	655.061	78.673	863.299	44.3629	0	0	0	0	0	0	1991.52	0	0	0	0	0	0	0	309.756	0	0	0	0	0	69.656	0	0	494.915	0	214.833	249.325	547.535
29716	Osteopontin	YPDAVATWLNPDPSQK	1800.97	34.55	0	33.096	0	0	0	0	15.809	116.357	30.256	46.668	19.011	0	0	711.25	0	0	0	14.276	0	0	55.0412	0	328.436	1475.44	71.2356	46.211	0	0	481.169	0	0	48.081	0	45.0397	0	56.786	116.924	0	0	0	0	31.741	91.464	158.809	273.403
30643	Osteopontin	AIPVAQDLNAPSDWDSR	1853.75	34.661	0	0	0	0	0	0	0	0	0	0	0	0	0	0	0	0	0	0	0	0	0	0	0	0	970.701	0	0	0	0	0	0	0	0	0	0	0	0	0	0	0	0	0	0	1299.09	0
38731	Osteopontin	GKDSYETSQLDDQSAETHSHK	2362.15	26.742	0	0	0	0	0	0	0	70.144	0	0	0	0	0	0	0	0	0	6.464	18.102	0	0	0	0	0	0	0	0	0	0	0	0	0	0	0	0	0	0	0	19.225	0	0	0	0	0	0
39838	Osteopontin	QLYNKYPDAVATWLNPDPSQK	2447.35	31.121	135.239	208.845	0	35.87	0	61.047	152.464	109.054	53.989	75.559	0	0	0	154.46	0	0	32.6461	198.615	0	93.915	0	0	0	0	0	23.131	53.447	0	53.085	0	0	43.439	94.423	0	0	66.487	28.105	0	0	223.763	0	278.274	0	0	59.034
677	Pigment epithelium-derived factor	TESIIHR	854.502	22.486	0	0	0	0	0	0	43.613	0	27.437	19.792	0	0	27.293	0	0	0	0	73.425	66.676	0	0	0	0	0	0	0	0	0	12.221	0	68.609	0	0	0	0	30.139	0	0	0	0	53.56	38.854	0	0	84.365
2165	Pigment epithelium-derived factor	VPMMSDPK	903.476	28.745	17.348	17.19	0	0	0	0	45.501	0	39.616	189.074	523.429	367.262	0	0	0	0	0	0	0	9.119	0	0	300.134	0	0	0	0	0	0	0	120.95	293.642	0	0	0	13.764	41.291	110.954	0	0	19.373	0	495.612	0	38.848
6216	Pigment epithelium-derived factor	SSFVAPLEK	976.46	29.645	0	0	200.764	0	0	0	0	0	0	0	0	0	0	0	0	0	0	0	0	0	0	0	0	0	0	0	0	0	0	0	0	0	0	0	0	0	0	0	0	0	0	0	0	0	0
8873	Pigment epithelium-derived factor	LSYEGEVTK	1024.57	30.746	44.176	32.199	0	41.976	0	0	113.862	304.145	140.261	33.588	64.772	39.56	36.969	139.592	101.487	0	0	152.086	27.541	38.336	32.8815	46.1796	27.535	0	44.194	27.811	66.027	0	88.793	46.2794	58.203	0	137.587	87.8333	0	107.083	139.57	88.77	72.464	566.134	248.453	100.642	33.35	0	157.659
10426	Pigment epithelium-derived factor	TVQAVLTVPK	1054.6	31.361	0	0	0	0	0	0	4.348	17.197	0	0	0	0	0	0	0	0	0	0	0	0	0	0	0	0	0	0	0	0	0	0	0	0	0	0	0	2.858	34.571	23.294	0	0	0	0	0	0	0
12423	Pigment epithelium-derived factor	YGLDSDLScK	1098.55	33.167	0	28.384	0	0	0	0	0	0	0	0	0	0	0	0	0	0	0	0	0	0	0	0	0	0	0	0	0	0	0	0	0	0	0	0	0	0	0	0	0	0	0	0	0	0	0
16342	Pigment epithelium-derived factor	ELLDTVTAPQK	1213.71	32.055	523.943	300.798	0	324.734	0	73.611	310.011	383.999	144.321	350.056	112.839	634.529	668.994	2379.97	246.022	0	0	514.625	843.783	291.602	0	0	716.834	418.632	0	22.068	327.277	183.141	423.708	0	575.329	389.618	532.144	93.2761	0	271.542	738.725	455.071	505.009	599.382	702.691	642.022	886.693	0	636.514
17503	Pigment epithelium-derived factor	DTDTGALLFIGK	1249.71	32.939	451.386	414.203	0	101.557	0	0	277.579	368.249	188.342	442.145	151.666	247.629	290.38	1294.86	169.803	0	158.661	518.229	461.027	147.087	142.755	142.891	0	0	292.87	138.038	450.231	66.53	277.423	195.123	165.685	468.03	200.678	175.378	123.58	258.206	436.528	207.466	268.393	1011	580.201	561.32	640.425	393.212	561.14
18032	Pigment epithelium-derived factor	LKLSYEGEVTK	1265.62	22.833	0	0	23.427	0	0	0	0	0	0	0	0	0	0	0	0	0	0	0	0	0	0	0	0	0	0	0	0	0	0	0	0	0	0	0	0	0	0	0	0	0	0	0	0	0	0
21297	Pigment epithelium-derived factor	LQSLFDSPDFSK	1382.57	32.629	0	3.585	0	0	0	0	0	562.877	65.336	0	0	0	0	0	0	0	0	0	0	0	0	0	0	0	0	0	0	0	0	0	0	79.303	0	0	806.69	73.669	0	0	0	0	0	116.829	0	0	0
24119	Pigment epithelium-derived factor	TSLEDFYLDEER	1515.76	33.08	105.286	10.119	0	0	0	560.187	0	835.568	0	0	0	0	0	0	0	0	0	0	0	0	0	0	0	0	0	0	0	0	0	0	0	0	0	0	0	0	0	0	0	0	0	0	0	0	720.029
24955	Pigment epithelium-derived factor	LAAAVSNFGYDLYR	1558.85	33.371	1666.44	1248.24	36.398	1167.78	0	0	723.078	744.285	612.849	1066.13	834.201	944.417	464.522	2275.72	843.014	0	578.137	970.9	1524.88	598.374	1060.57	795.268	1238.84	1424.11	1896.29	496.557	1742.59	1012.29	1017.56	1003.15	564.152	1529.62	827.86	806.178	1160.91	1279.62	1432.66	1096.45	1092.58	2399.64	1635.47	1382.41	1797.8	1437.6	907.461
26750	Pigment epithelium-derived factor	KTSLEDFYLDEER	1643.86	27.141	730.11	494.822	0	165.554	0	81.61	174.148	386.602	26.77	491.487	203.166	312.5	0	1665.76	208.626	1039.49	151.36	335.096	0	134.691	234.009	128.369	671.589	625.793	607.585	163.352	283.611	0	220.309	168.459	169.899	533.959	0	13.5933	400.734	357.343	0	0	245.429	561.59	734.233	335.611	1098.2	351.892	509.536
30174	Pigment epithelium-derived factor	LDLQEINNWVQAQMK	1828.98	34.006	0	0	0	0	0	0	204.736	0	149.342	87.306	0	0	0	0	0	0	73.5071	130.093	193.578	151.461	208.802	156.095	0	0	0	0	0	342.122	0	90.8393	67.798	256.429	192.46	149.129	0	213.442	403.953	88.547	189.624	688.064	0	0	0	0	0
32456	Pigment epithelium-derived factor	ALYYDLISSPDIHGTYK	1955.08	29.408	489.233	438.892	0	107.453	0	0	613.376	408.747	477.933	171.689	92.035	142.53	209.668	801.159	0	0	240.775	422.924	274.398	224.111	0	122.657	0	353.92	355.36	44.471	105.771	0	18.014	234.933	223.442	406.754	330.905	429.312	306.905	616.523	76.445	270.732	276.332	0	329.118	547.818	0	271.965	147.081
581	Plasminogen	DVVLFEK	848.454	27.879	0	0	0	0	0	0	14.232	0	0	0	0	0	0	0	0	0	0	0	0	0	0	0	0	0	0	0	0	23.647	0	0	0	0	0	0	0	2.594	0	0	0	0	0	0	0	0	0
9243	Plasminogen	LSSPAVITDK	1029.62	30.679	9.196	68.761	0	0	0	0	14.28	47.98	0	93.948	108.679	0	0	0	51.658	0	0	0	25.45	39.106	0	0	0	0	0	0	0	0	0	0	19.023	0	25.189	0	0	58.654	13.767	16.148	9.82	0	0	0	0	0	0
28703	Prostaglandin-H2 D-isomerase	TMLLQPAGSLGSYSYR	1742.95	33.993	4681.2	4126.32	351.852	4156.67	0	397.988	2194.03	32.982	0	0	1752.13	0	15.991	5019.23	0	0	3291.63	93.388	3678.99	2704.97	0	7833.68	7487.25	8854.97	0	1637.19	50.619	0	14.665	0	8.659	3274.62	3842.21	0	3136.28	3034.93	48.342	2732.05	3725.98	135.196	4820.03	48.812	2381.47	0	0
31647	Prostaglandin-H2 D-isomerase	AQGFTEDTIVFLPQTDK	1909.06	35.029	3212.88	3689.33	3753.92	6891.08	15371.9	4940.01	1742.2	3557.82	1854.71	3943.33	4955.56	4889.24	7089.52	26796.5	8415.85	55767.7	2294.46	4202.58	4799.5	1641.65	2821.82	0	15464.7	39345.5	6680.22	1391.19	7445.4	4524.73	8442.8	0	1418.91	5181.17	2483.24	0	6318.63	2040.92	7168.8	2647.23	2525.03	7801.65	4340.01	5942.19	13781.4	9124.57	12432.3
462	Prostaglandin-H2 D-isomerase	MATLYSR	840.473	27.95	0	0	22.994	3.938	0	0	0	0	0	103.001	0	0	0	0	0	0	0	0	0	22.246	0	0	0	0	0	0	74.642	28.142	0	0	23.482	0	0	0	0	19.9	0	0	0	71.858	0	47.496	0	0	86.811
28953	Prostaglandin-H2 D-isomerase	TmLLQPAGSLGSYSYR	1758.95	34.029	367.831	424.289	0	288.007	0	77.402	151.955	0	219.979	0	1010.37	804.389	48.556	2954.66	3059.12	0	245.041	438.146	2631.86	331.998	185.646	0	2375.87	9748.62	0	410.126	546.195	0	1337.45	362.984	254.319	965.873	707.673	0	1052.44	949.043	1365.34	1389.66	463.911	3088.56	2851.91	30.157	2946.33	1783.46	2806.7
4982	Protein Jade-2	EAGAEEVVR	958.418	28.388	0	5.244	0	0	0	0	0	0	0	0	0	0	0	0	0	0	0	0	6.134	0	0	0	0	0	0	0	0	0	0	0	0	0	0	0	0	0	0	0	0	0	0	0	0	0	0
22355	Protein Jade-2	LQEQIFHLQmK	1429.79	25.862	0	0	0	0	0	0	2.214	0	0	0	0	0	0	0	0	0	0	0	0	0	0	0	0	0	0	0	0	0	0	0	0	0	0	0	0	0	0	0	0	0	0	0	0	0	0
1161	Protein S100-A9	DLQNFLK	876.473	31.06	0	0	0	0	0	0	2.559	0	2.397	0	0	0	3.348	0	0	0	0	0	0	0	0	0	0	0	0	0	0	0	0	0	0	0	0	0	0	4.439	0	0	0	0	9.368	0	0	0	0
22867	Protein S100-A9	LGHPDTLNQGEFK	1454.76	26.29	0	0	1868.92	0	0	264.576	0	0	0	0	0	0	0	0	0	0	0	0	0	0	0	0	0	0	0	0	0	0	0	0	0	0	0	0	0	0	0	0	0	0	0	0	0	0	0
15816	Prothrombin	ELLESYIDGR	1193.63	31.391	0	0	0	0	0	0	694.038	0	0	0	0	0	0	0	0	0	0	0	0	42.595	0	0	0	0	0	0	0	0	0	0	148.18	0	0	0	0	0	0	0	0	0	0	0	0	0	0
25060	Prothrombin	TATSEYQTFFNPR	1560.81	33.121	41.493	0	0	0	0	0	20.194	0	62.963	0	0	0	0	0	0	0	77.7732	0	0	57.832	0	62.2214	0	0	0	0	0	0	0	0	166.149	0	73.32	54.77	0	71.018	0	0	0	0	0	133.098	0	0	0
434	Retinol-binding protein 3	AVGPQLVR	838.488	28.136	0	0	0	0	0	0	0	0	0	0	0	0	0	0	0	0	0	0	0	0	0	0	0	0	0	0	0	0	0	0	0	0	0	0	0	0	0	0	0	0	0	0	0	0	0
709	Retinol-binding protein 3	TGGGALDLR	858.445	28.728	0	0	0	0	0	0	0	0	0	0	0	0	0	0	0	0	0	0	0	0	0	0	0	0	0	0	0	0	0	0	3.532	0	0	0	0	0	0	4.392	0	0	0	0	0	0	0
971	Retinol-binding protein 3	ALAILTLR	869.585	28.664	773.775	1861.09	5337.27	1379.33	42765.2	3337.49	634.94	5620.71	257.221	1671.05	2140.08	3339.59	1163.9	4397.79	4534.18	94590	0	1031.55	1715.76	317.563	0	0	2506.58	63151.1	0	725.685	1260.49	3082.08	1036.71	0	346.467	2458.22	571.622	0	0	167.581	368.342	623.729	471.085	997.836	1850.62	1469.06	4679.26	0	2376.54
8205	Retinol-binding protein 3	VPTVLQTAGK	1012.55	29.979	0	0	0	0	216.936	0	0	0	0	0	0	0	0	0	0	0	0	0	0	0	0	0	0	0	0	23.986	135.78	0	0	0	0	36.614	0	0	0	0	0	0	0	224.455	0	0	0	0	0
9914	Retinol-binding protein 3	GVYLLTSHR	1044.55	23.068	0	0	0	0	0	0	0	0	0	0	0	0	0	0	0	0	0	0	0	0	0	0	0	0	0	0	0	0	0	0	0	0	0	0	0	0	0	0	0	0	0	0	0	0	0
15025	Retinol-binding protein 3	GVAEDIAHILK	1164.63	24.612	0	0	0	0	0	0	534.538	0	0	0	0	0	0	0	0	1898.66	0	0	1040.01	0	0	0	912.069	1011.39	0	338.737	402	0	785.953	0	0	1398.63	0	0	0	0	0	0	662.419	0	428.417	0	0	0	0
16300	Retinol-binding protein 3	AKVPTVLQTAGK	1211.72	25.73	0	59.985	0	0	0	1643.45	44.648	280.575	76.66	204.948	166.63	142.567	0	0	0	0	0	0	0	29.984	0	174.818	0	0	0	0	0	0	0	108.553	0	0	0	113.435	0	116.76	0	0	0	0	0	0	124.471	99.0342	0
17602	Retinol-binding protein 3	FDAMAELETVK	1252.62	31.336	0	0	0	0	0	0	5.626	0	0	0	0	0	0	0	0	0	0	21.212	0	0	0	0	0	0	0	0	0	0	0	0	0	0	89.066	0	0	14.602	21.971	0	21.361	0	0	18.434	0	0	51.742
20063	Retinol-binding protein 3	LNAGLQAASEDPR	1340.59	31.557	0	0	0	0	0	0	0	0	0	0	0	0	0	0	0	0	0	0	0	0	0	0	0	0	0	0	0	0	0	0	0	0	0	0	0	0	0	0	0	0	0	0	0	0	290.491
20157	Retinol-binding protein 3	TEVLPGQLGYLR	1344.77	31.82	669.802	871.894	300.28	454.181	0	0	4031.25	266.096	2519.65	719.743	349.548	481.45	1104.73	936.117	162.521	0	2672.05	3129.39	1618.78	1609.43	3398.82	3016.74	0	0	998.978	631.858	883.494	296.364	477.95	1619.32	2418.8	612.909	2795.4	2196.23	949.055	2406.79	1699.61	983.043	2889.45	2415.54	1142.73	2428.2	0	925.294	200.332
21329	Retinol-binding protein 3	HEVLEGNVGYLR	1384.71	27.86	0	0	0	0	0	0	0	0	0	0	0	0	0	0	0	0	0	0	0	0	0	0	0	0	0	0	0	0	0	0	0	0	0	0	0	0	0	0	0	0	0	0	48.092	0	0
22181	Retinol-binding protein 3	LVADNYASAELGAK	1420.75	33.078	0	84.308	0	34.264	0	0	83.344	55.608	185.971	313.896	0	0	0	715.433	0	0	0	64.156	131.6	43.075	0	0	0	0	0	0	0	0	0	0	103.482	99.314	64.905	0	146.641	278.317	424.169	0	62.039	144.832	368.998	237.289	0	0	0
22669	Retinol-binding protein 3	IMHTDAMIIDMR	1445.76	26.259	0	0	0	0	0	0	3.276	0	0	0	0	0	0	0	0	0	0	0	0	0	0	0	0	0	0	0	0	0	0	0	0	0	0	0	0	1.702	0	0	0	0	0	0	0	0	0
25475	Retinol-binding protein 3	VTEVWTLPQVAGQR	1582.85	33.482	0	274.546	0	0	0	12615.6	65.795	0	0	451.23	0	0	0	463.919	336.594	429.671	0	199.171	0	101.288	0	20.5565	154.509	866.798	163.806	0	0	0	104.675	0	0	467.963	0	0	0	10.733	0	237.804	194.619	0	510.236	286.663	0	0	0
25733	Retinol-binding protein 3	IGESDFFFTVPVSR	1599.75	33.217	0	0	0	0	0	0	0	0	0	47.651	0	252.189	0	72.798	165.316	0	0	0	609.908	0	0	0	0	0	1170.92	0	0	0	0	0	0	0	0	548.43	0	0	0	0	0	0	0	0	515.442	0	0
28063	Retinol-binding protein 3	FDMFGDGELLTQVSR	1713.88	34.003	39.483	0	0	0	0	0	83.009	0	98.79	0	44.576	0	0	0	0	0	0	292.086	64.685	64.749	74.9017	0	0	0	0	26.17	0	0	37.985	0	91.251	490.656	0	50.7743	0	0	372.498	0	169.558	215.026	247.8	32.619	0	0	0
28610	Retinol-binding protein 3	YGADKDVVVLTSSQTR	1737.99	29.127	70.907	94.597	0	0	0	0	74.191	73.453	121.676	70.694	0	0	0	1037.27	0	0	0	81.714	72.434	49.351	0	0	0	0	0	0	16.5	0	0	0	27.86	0	37.077	17.0591	82.6091	106.439	225.662	0	67.186	64.668	36.052	174.13	0	0	0
33801	Retinol-binding protein 3	FDSFADASVLGVLAPYVLR	2039.14	35.187	30.203	0	0	0	0	0	0	0	27.619	0	0	0	0	0	0	0	0	6.417	0	0	0	0	0	0	0	0	0	0	0	0	0	0	0	0	0	48.558	0	0	0	0	0	189.192	0	0	0
41150	Retinol-binding protein 3	IYSRPDDSVSELWTHAQVVGER	2543.36	24.478	0	0	0	0	0	0	0	0	0	0	0	0	0	0	0	0	0	0	0	0	0	0	0	0	0	0	0	0	0	0	0	0	139.962	0	0	0	0	0	0	0	0	0	0	0	0
41268	Retinol-binding protein 3	TAVDLESLASQLTADLQEVSGDHR	2554.39	32.188	0	107.053	0	0	0	0	216.99	29.243	183.371	292.493	0	0	53.739	844.592	0	0	102.649	434.283	235.398	0	0	0	0	0	0	0	18.425	85.422	84.057	0	0	0	145.607	0	0	216.162	516.692	0	510.958	244.05	0	535.276	0	131.264	155.196
44583	Retinol-binding protein 3	SVGASDGSSWEGVGVTPHVVVPAEEALAR	2862.59	33.306	212.37	283.632	0	0	0	0	116.168	0	186.758	0	0	0	22.315	0	0	0	0	27.963	0	64.55	0	0	0	0	0	0	75.918	0	157.162	0	13.153	138.238	24.497	0	212.882	372.674	343.035	0	81.43	154.144	234.611	42.379	0	131.221	215.736
3796	Serine/cysteine proteinase inhibitor clade G member 1 splice variant 2	MEPFHFK	934.491	22.165	15.996	10.864	0	0	0	0	0	0	0	23.192	0	0	0	115.679	0	0	0	0	0	0	0	0	0	396.979	0	0	26.154	0	0	0	0	0	0	0	0	0	0	0	0	0	0	21.732	0	0	0
13124	Serine/cysteine proteinase inhibitor clade G member 1 splice variant 2	LLDSLPSDTR	1115.54	30.233	13.851	21.213	0	0	0	0	0	17.594	0	0	0	0	0	0	0	0	0	0	0	0	0	0	0	0	0	0	0	0	0	0	0	0	0	0	0	0	0	0	0	0	0	0	0	0	0
15554	Serine/cysteine proteinase inhibitor clade G member 1 splice variant 2	FQPTLLTLPR	1184.66	31.694	0	3.373	0	81.417	0	0	0	0	0	0	35.273	0	0	0	0	0	0	0	0	0	0	0	0	0	0	0	0	187.02	0	28.7977	0	0	0	14.8175	0	0	0	0	0	0	0	0	0	0	0
17930	Serine/cysteine proteinase inhibitor clade G member 1 splice variant 2	TNLESILSYPK	1263.57	34.382	0	0	0	0	0	33.394	0	0	0	0	0	0	0	0	0	0	0	0	0	0	0	0	0	0	0	0	0	0	0	0	0	0	0	0	0	0	0	0	0	0	0	0	0	0	0
30137	Serine/cysteine proteinase inhibitor clade G member 1 splice variant 2	GVTSVSQIFHSPDLAIR	1826.05	28.675	0	0	0	0	0	0	317.48	80.498	33.239	25.147	0	0	36.47	670.13	433.892	0	0	1032.14	433.745	168.286	173.549	0	0	0	0	31.125	0	0	154.295	0	83.767	0	0	0	0	197.441	360.6	31.477	378.808	0	0	343.364	0	0	28.331
31211	Serine/cysteine proteinase inhibitor clade G member 1 splice variant 2	HRLEDMEQALSPSVFK	1885.98	22.057	0	0	0	0	0	0	0	0	0	0	0	0	0	0	0	0	0	0	0	0	0	0	0	0	0	33.936	36.163	64.14	0	0	0	0	0	0	0	0	0	0	0	0	0	0	0	0	21.151
1350962	Serine/cysteine proteinase inhibitor clade G member 1 splice variant 2	VTTSQDMLSIMEK	1481.71	32.709	0	0	0	0	0	0	0	48.677	0	0	0	0	0	0	0	0	0	11.3	84.993	0	0	0	0	0	0	0	0	0	0	0	0	0	0	0	0	0	0	0	0	0	0	12.662	0	0	0
1067	Serotransferrin	DSAHGFLK	873.487	23.272	155.697	239.6	175.822	520.412	485.913	162.864	192.242	307.318	176.677	315.627	326.816	89.337	127.696	669.184	184.483	0	0	215.813	207.389	156.279	0	0	131.976	251.18	0	237.359	99.976	14.941	202.797	0	149.429	32.125	219.542	0	0	134.892	0	122.333	132.362	87.985	316.104	255.511	282.556	0	574.993
3961	Serotransferrin	ASYLDcIR	938.461	28.756	0	0	0	0	0	26.448	0	0	0	0	0	0	0	0	0	0	0	0	0	0	0	0	0	0	0	0	0	0	0	0	0	0	0	0	0	0	0	0	0	0	0	0	0	0	0
6254	Serotransferrin	DGAGDVAFVK	977.452	30.161	0	0	0	0	0	60.965	0	0	0	0	514.223	0	335.641	0	403.386	0	0	0	0	0	0	0	0	0	0	0	49.564	0	0	0	0	0	0	0	0	0	0	0	0	0	0	0	0	0	0
7578	Serotransferrin	YLGEEYVK	999.435	30.557	0	0	0	0	0	0	0	7.718	0	0	0	0	0	0	0	0	0	0	0	0	0	0	0	0	0	0	0	0	0	0	17.793	0	0	0	0	0	0	0	0	0	0	0	0	0	0
14063	Serotransferrin	WcALSHHER	1136.58	20.341	0	0	0	0	0	0	0	0	0	0	0	0	0	0	0	0	0	0	0	0	0	0	0	0	0	0	0	0	0	0	0	0	0	0	0	0	0	0	0	0	0	0	0	0	0
15836	Serotransferrin	DSGFQMNQLR	1194.61	31.699	1695.67	1931.35	816.158	2822.36	1762.66	0	0	265.67	781.362	967.111	1402.92	1510.83	427.73	1957.35	797.277	1612.89	0	265.45	209.018	574.61	626.63	598.457	778.867	996.394	1074.36	966.728	834.331	0	1219.07	943.057	216.211	1295.4	305.694	0	863.574	971.571	357.978	0	530.91	682.691	796.439	461.782	1786.29	1329.89	1539.11
16248	Serotransferrin	DSGFQmNQLR	1210.62	31.881	74.267	109.147	155.569	347.667	0	0	41.741	44.5	335.415	103.366	158.217	0	125.313	343.116	126.171	0	0	32.823	0	41.535	0	25.2914	0	0	137.223	0	0	0	109.42	71.4203	45.325	182.319	58.079	45.0844	97.5595	96.821	0	0	31.26	0	84.403	54.661	353.144	132.594	419.007
17490	Serotransferrin	SASDLTWDNLK	1248.66	31.528	2563.12	3324.63	3695.97	6802.16	9263.39	415.737	1345.85	0	1517.32	1467.29	1725.65	1569.09	0	4355.52	1002.14	3137.76	1373.21	1710.67	1747.39	1111	1237.15	820.37	2044.58	2087.49	2459.29	1835.67	1816.31	354.402	2606.46	1382.14	906.195	0	1718	943.654	1533.07	1614.53	1136.1	0	1298.68	0	2339.74	2724.92	4767.47	2279.06	2926.81
17801	Serotransferrin	WcAVSEHEATK	1258.56	24.232	0	0	0	0	0	0	0	0	0	0	0	0	0	0	0	0	34.6125	28.562	0	0	0	0	0	0	0	0	0	0	0	0	0	0	0	0	0	0	0	0	0	0	0	53.407	0	0	0
18321	Serotransferrin	HSTIFENLANK	1272.69	26.761	0	0	0	0	0	0	0	0	0	0	0	0	0	0	0	0	0	0	0	0	0	0	0	0	0	0	0	0	0	0	14.796	0	0	0	0	0	0	0	0	0	0	0	0	0	0
18413	Serotransferrin	EFQLFSSPHGK	1275.59	24.997	0	0	0	0	0	0	0	0	0	0	0	0	0	0	0	0	0	0	0	0	341.887	0	0	0	0	0	0	0	0	0	0	0	0	0	0	0	0	0	0	0	0	0	0	0	0
18587	Serotransferrin	EGYYGYTGAFR	1282.63	31.624	3384.03	2668.56	2393.98	4625.16	1085.9	343.645	1839.66	1762.58	1924.89	1925.01	1795.97	1983.41	2198.14	2421.5	949.946	1037.88	1238.94	1784.07	1767.07	1133.38	1309.44	1090.83	1994.57	814.674	1816.89	2282.69	2768.69	511.406	1457.66	1134.82	1051.52	1993.06	1606.09	1174.73	1665.66	2030.22	1256.96	1613.17	1282.73	6007.13	1965.99	2451.36	2572.83	2527.11	2011.31
18902	Serotransferrin	DYELLcLDGTR	1295.52	31.454	0	0	0	0	0	0	0	0	0	0	0	0	0	0	0	0	0	0	0	0	0	0	0	0	0	0	0	28.498	0	0	0	0	0	0	0	0	0	0	0	0	0	0	0	0	0
19538	Serotransferrin	cLKDGAGDVAFVK	1320.62	24.909	0	0	0	0	0	0	0	0	0	0	0	0	40.41	0	0	0	0	0	0	0	0	0	0	0	0	0	0	0	0	0	0	0	0	0	0	0	0	0	0	0	0	0	0	0	0
19579	Serotransferrin	KDSGFQMNQLR	1322.7	25.258	0	1321.02	0	0	0	0	0	0	0	0	0	0	0	896.527	0	1616.11	0	0	0	0	0	0	0	0	0	0	0	0	612.109	0	0	0	0	0	0	0	0	0	0	0	0	0	0	0	0
20532	Serotransferrin	SVIPSDGPSVAcVK	1356.7	32.876	105.065	0	0	0	0	0	5.334	0	2.266	0	0	0	491.228	0	0	0	0	0	50.29	0	0	0	0	2452.79	0	0	0	0	0	0	0	0	0	0	0	21.881	0	0	5.061	0	0	0	0	0	0
21175	Serotransferrin	KSASDLTWDNLK	1376.75	25.728	971.126	1137.84	367.718	549.941	1414.8	369.577	215.94	517.654	300.547	210.822	0	295.944	0	1028.03	260.738	0	0	449.295	0	233.141	237.828	286.618	0	0	344.758	520.808	255.836	0	335.203	271.16	144.98	0	132.498	202.853	363.907	269.718	0	0	216.218	0	165.212	324.345	0	413.203	0
23317	Serotransferrin	MYLGYEYVTAIR	1477.79	32.724	3614.99	2954.57	0	2344.53	0	0	2931.92	151.216	1993.38	1720.71	0	1287.76	0	5147.3	0	0	2168.52	2918.57	1791.56	1928.34	1370.79	2049.69	0	814.161	1839.99	2749.91	0	0	2028.17	2641.89	2061.52	2213.86	2606.33	1887.19	1485.91	2413.32	2221.01	1538.34	2321.25	5357.93	2406.01	3119.23	1594.38	2935.22	0
23371	Serotransferrin	DQYELLcLDNTR	1480.68	32.402	16.251	191.63	584.547	0	0	0	7.152	0	0	0	0	0	0	0	0	0	0	0	20.814	0	0	0	0	0	0	0	0	155.222	43.201	0	0	0	0	0	0	0	0	0	0	0	0	0	42.341	0	0
23526	Serotransferrin	DLLFKDSAHGFLK	1489.88	23.604	95.232	52.009	0	0	0	0	72.808	0	70.087	0	0	0	0	0	0	0	67.5771	70.863	0	78.598	0	244.164	0	0	0	85.087	73.074	42.645	24.567	74.6426	169.661	0	60.145	333.546	0	95.493	0	0	126.413	0	0	30.72	0	0	17.55
23540	Serotransferrin	SKEFQLFSSPHGK	1490.83	22.325	3273.12	2372.79	0	204.718	1846.57	0	670.441	284.073	566.713	1538.4	1994.34	1889.79	0	1227.46	1042.33	2175.65	0	376.647	268.462	745.727	287.505	580.235	997.667	736.53	1385.96	1461.17	437.232	0	1081.7	707.308	375.697	0	480.853	480.445	754.628	639.114	0	0	0	463.475	1489.74	568.057	259.511	1194.14	533.824
23597	Serotransferrin	mYLGYEYVTAIR	1493.78	32.69	319.022	320.629	0	226.957	0	0	193.089	798.721	172.164	189.754	0	376.197	0	849.239	0	0	92.1801	231.73	1473.07	148.638	0	0	0	1658.05	0	0	0	0	0	0	189.966	1032.74	499.746	288.416	111.1	690.383	999.436	1330.71	766.184	1668.37	1121.43	510.129	1001.64	0	0
23876	Serotransferrin	DLLFRDDTVcLAK	1506.77	24.534	0	0	0	0	0	0	0	0	7.464	0	0	0	0	0	0	0	0	9.616	0	12.17	0	0	0	0	0	0	0	0	0	0	15.367	0	0	0	0	17.557	0	0	0	0	0	0	0	0	0
24162	Serotransferrin	FDEFFSEGcAPGSK	1518.63	32.489	0	0	0	0	0	0	0	0	0	0	0	0	0	0	0	0	0	0	0	0	0	0	0	0	0	0	0	0	0	0	0	0	0	0	0	0	0	0	0	0	0	0	0	0	0
24353	Serotransferrin	KPVEEYANcHLAR	1527.81	22.511	0	0	0	0	0	0	0	0	0	0	0	0	0	0	27.428	0	0	0	0	3.688	0	0	0	0	0	7.227	0	0	0	15.5149	0	0	0	0	0	0	0	0	0	0	0	0	73.149	0	0
25362	Serotransferrin	TAGWNIPMGLLYNK	1576.69	33.27	0	0	0	0	0	1122.86	538.732	0	883.649	0	0	0	0	0	0	0	0	0	0	0	2400.68	0	0	0	2777.74	0	0	0	0	0	0	0	0	1807.36	0	1192.72	0	0	0	0	0	0	0	0	0
25568	Serotransferrin	LcMGSGLNLcEPNNK	1589.79	32.431	1924.85	1796.17	1190.95	2939.62	0	0	670.537	346.047	462.624	459.314	251.332	348.746	438.729	838.648	98.224	0	409.752	443.274	217.5	333.717	368.698	113.788	81.324	0	0	0	510.134	0	226.871	152.322	279.124	527.703	388.862	351.008	401.872	515.598	410.558	262.956	311.526	906.53	408.413	537.499	338.179	730.804	525.631
25627	Serotransferrin	TAGWNIPmGLLYNK	1592.85	33.436	76.13	373.128	0	0	0	0	297.992	335.018	65.052	14.675	0	0	0	923.06	124.478	0	47.1496	216.666	0	732.812	0	0	0	0	0	0	0	87.717	0	95.5285	81.139	0	276.592	734.246	73.4285	1027.93	296.097	183.983	118.164	246.45	138.825	483.81	0	66.2363	0
25887	Serotransferrin	IEcVSAETTEDcIAK	1608.79	32.878	1623.12	3525.51	2331.3	4099.31	1936.68	294.039	527.85	977.464	463.745	785.828	485.214	1059.62	1007.86	1881.96	223.649	0	891.119	982.521	2390.67	615.695	322.203	405.592	628.798	0	590.512	11.906	0	0	1257.1	619.555	758.537	1460.9	1011.24	466.349	432.207	887.534	1395.52	2581.99	1187.94	1814.96	1692.21	1446.53	1912.84	1091.36	1361.75
26005	Serotransferrin	HSTIFENLANKADR	1614.81	25.718	0	0	0	0	0	0	0	0	0	0	0	0	0	0	0	0	0	0	65.534	0	0	0	0	0	0	0	0	0	0	0	0	0	0	0	0	0	0	17.535	0	0	15.801	0	0	0	0
26409	Serotransferrin	EDPQTFYYAVAVVK	1628.76	32.864	0	0	0	0	0	0	0	0	0	0	0	0	0	0	0	0	0	0	0	0	0	0	0	0	0	0	0	81.986	0	0	0	0	0	0	0	0	0	0	0	0	0	0	0	0	0
27776	Serotransferrin	EGTcPEAPTDEcKPVK	1700.84	27.04	1361.26	1250.27	625.83	1313.99	2380.11	206.952	158.069	0	15.328	210.861	0	0	12.941	412.146	0	0	0	0	0	13.3	0	11.9276	0	0	0	0	0	0	0	0	0	0	0	75.6113	0	79.719	0	0	0	0	0	0	0	0	144.072
31363	Serotransferrin	NLNEKDYELLcLDGTR	1894.04	28.871	0	99.851	0	0	0	0	0	0	0	0	0	0	0	0	0	0	0	0	0	4.95	0	0	0	0	0	0	0	26.4	0	0	0	0	0	0	0	0	0	0	0	0	0	0	0	0	0
32769	Serotransferrin	HQTVPQNTGGKNPDPWAK	1974.07	24.579	0	0	0	0	0	0	0	0	0	0	0	0	0	0	0	0	0	0	0	0	0	0	0	0	0	0	0	0	0	0	0	0	0	0	0	0	0	0	0	0	0	0	0	0	0
33349	Serotransferrin	SDNcEDTPEAGYFAVAVVK	2013.01	35.108	23.821	9.885	0	0	0	0	58.482	402.25	7.276	33.131	176.512	37.891	0	0	408.463	0	53.9254	558.518	712.746	41.15	26.6661	0	881.937	0	0	0	0	322.891	412.305	0	223.144	0	427.405	0	0	116.868	214.705	597.986	298.569	757.158	384.989	415.273	343.439	0	40.445
34232	Serotransferrin	EDLIWELLNQAQEHFGK	2069.13	29.004	318.768	359.463	0	0	0	0	655.197	0	1051.02	18.762	0	0	621.062	0	0	0	420.705	630.01	459.553	160.934	409.796	1182.21	0	0	0	67.882	17.093	0	153.766	851.552	407.502	0	880.152	775.081	173.934	730.881	398.226	0	348.135	0	0	1401.24	0	86.9912	0
35358	Serotransferrin	IMNGEADAMSLDGGFVYIAGK	2157.93	35.592	0	0	0	0	0	0	0	0	0	0	0	0	0	0	0	0	0	0	0	0	0	0	0	0	0	0	0	0	0	0	0	0	0	0	0	0	0	0	0	0	0	0	0	2449.39	0
35565	Serotransferrin	IMNGEADAmSLDGGFVYIAGK	2174.11	35.702	309.104	710.262	0	862.481	0	0	0	1293.06	356.69	576.762	598.599	960.331	398.43	1535.76	438.065	0	0	277.205	1063.88	297.573	0	0	621.169	278.576	0	2031.8	546.293	880.132	1101.22	0	298.881	1284.42	622.483	0	0	892.482	698.826	1113.92	328.718	2365.25	872.518	613.068	2185.56	0	1793.06
37921	Serotransferrin	EDLIWELLNQAQEHFGKDK	2312.24	25.397	193.637	348.814	47.955	200.027	0	0	114.02	0	495.992	31.802	0	34.339	144.186	0	0	0	0	0	146.382	244.389	0	633.186	0	0	0	68.248	0	0	80.055	289.855	217.293	0	37.384	553.695	0	293.458	0	143.36	100.569	0	55.339	64.047	0	0	31.479
40446	Serotransferrin	KPVDEYKDcHLAQVPSHTVVAR	2490.18	22.393	0	0	0	0	0	0	53.976	42.058	104.497	25.549	31.375	0	0	0	0	0	0	61.545	0	56.973	0	0	0	0	0	0	0	0	34.205	33.2166	0	0	5.511	20.9103	0	0	0	0	0	0	0	48.994	0	0	0
40991	Serotransferrin	SMGGKEDLIWELLNQAQEHFGK	2529.38	26.046	1101.35	240.289	0	0	0	0	926.005	0	985.358	0	0	0	0	0	0	0	1076.39	1163	292.35	805.58	675.288	533.952	0	0	81.1187	350.062	14.156	0	0	318.937	638.886	0	250.043	305.234	160.121	851.269	0	0	887.852	0	43.524	197.411	0	0	0
41198	Serotransferrin	SmGGKEDLIWELLNQAQEHFGK	2545.37	26.165	263.362	57.669	0	0	0	0	335.739	0	241.372	26.811	0	0	0	0	0	0	208.604	376.719	384.041	257.674	94.9399	0	0	0	0	0	33.331	0	100.912	95.689	280.673	0	199.249	123.563	100.902	518.356	0	0	403.294	0	72.212	162.678	0	0	0
1348566	Serotransferrin	DDTVcLAK	862.423	30.249	5.098	0	0	0	0	0	0	0	0	0	0	0	0	0	0	0	0	0	0	3.62	0	0	0	0	0	0	0	0	0	0	6.184	0	7.703	0	0	0	0	0	0	11.373	0	0	0	0	0
780	SERPINA3 Alpha-1-antichymotrypsin	LINDYVK	863.525	28.527	0	0	23.481	95.277	0	0	0	0	0	0	0	0	0	0	0	0	0	0	0	0	0	0	0	0	0	274.59	0	0	0	0	0	0	0	0	0	0	0	0	0	0	0	0	0	0	0
5919	SERPINA3 Alpha-1-antichymotrypsin	EQLSLLDR	972.572	29.414	0	54.025	675.702	0	0	0	21.631	0	127.428	0	0	38.102	0	79.333	129.224	0	0	0	0	0	0	0	0	194.981	0	0	320.486	293.509	44.037	0	105.909	122.377	0	0	0	79.424	129.223	97.149	0	191.607	147.491	0	0	0	181.356
7123	SERPINA3 Alpha-1-antichymotrypsin	KLINDYVK	991.624	23.163	57.614	189.75	154.442	90.386	389.674	97.039	24.3	0	33.187	68.761	129.943	173.511	45.086	0	109.039	1463.12	0	18.452	66.908	22.643	0	0	171.717	882.787	0	34.153	37.107	48.383	43.352	0	55.639	0	0	0	0	26.415	0	0	0	0	120.852	54.305	57.185	0	79.187
10806	SERPINA3 Alpha-1-antichymotrypsin	EIGELYLPK	1060.61	30.62	141.26	109.04	0	0	0	0	127.044	77.355	152.001	138.058	141.392	0	0	0	218.228	0	71.5183	76.676	165.403	46.869	0	153.488	0	0	152.019	114.819	134.934	0	53.268	126.327	120.958	74.537	164.068	0	123.635	112.988	125.175	0	74.602	179.834	96.146	78.772	0	67.3593	0
12223	SERPINA3 Alpha-1-antichymotrypsin	NLAVSQVVHK	1093.67	24.458	0	0	0	0	0	0	0	936.35	128.731	0	0	0	0	0	0	0	162.782	169.456	237.184	121	0	0	0	0	0	0	0	0	0	0	243.336	0	231.398	0	0	108.156	0	188.606	200.114	0	357.178	106.436	0	0	334.914
12812	SERPINA3 Alpha-1-antichymotrypsin	WRDSLEFR	1107.54	24.716	0	22.922	0	24.683	0	0	0	0	0	0	0	0	0	0	0	0	0	0	0	0	0	0	0	0	0	0	0	0	0	0	0	0	0	0	0	0	0	0	0	0	0	0	0	0	0
16373	SERPINA3 Alpha-1-antichymotrypsin	ITLLSALVETR	1214.67	31.54	0	0	0	0	0	0	0	0	0	0	0	0	0	0	0	0	49.9699	0	0	0	0	0	0	0	0	0	0	94.898	0	0	0	0	0	0	0	0	0	0	0	0	0	0	0	0	0
26481	SERPINA3 Alpha-1-antichymotrypsin	MEEVEAMLLPETLK	1631.84	33.587	0	33.149	0	0	0	0	2.85	0	240.586	0	836.155	1079.19	88.911	0	0	0	0	110.401	724.482	131.606	195.964	558.258	0	0	1185.68	0	0	27.773	0	0	0	0	421.963	0	0	358.049	354.349	811.592	189.416	0	196.948	111.192	0	0	0
29178	SERPINA3 Alpha-1-antichymotrypsin	WEMPFDPQDTHQSR	1772.88	28.115	66.775	89.373	0	0	0	0	67.756	224.853	152.607	36.633	0	0	0	0	0	0	0	204.328	189.854	63.51	0	94.9416	0	0	0	72.45	133.703	0	89.123	130.228	68.955	0	57.443	101.908	0	26.65	0	0	88.748	0	149.297	197.773	0	0	0
29521	SERPINA3 Alpha-1-antichymotrypsin	MEEVEAMLLPETLKR	1788.03	28.554	52.247	87.785	0	0	0	0	12.834	0	0	0	0	0	0	0	0	0	0	0	0	0	0	0	0	0	0	0	0	0	0	0	0	0	0	0	0	0	0	0	0	0	0	0	0	0	0
31302	SERPINA3 Alpha-1-antichymotrypsin	LYGSEAFATDFQDSAAAK	1890.98	32.65	0	0	0	0	0	0	0	0	0	0	0	0	0	0	0	0	0	0	0	3.466	0	0	0	0	0	0	0	0	18.099	0	0	0	0	0	0	0	17.717	0	0	0	0	0	0	0	0
31610	SERPINA3 Alpha-1-antichymotrypsin	AVLDVFEEGTEASAATAVK	1906.99	34.729	0	0	0	0	0	0	6.877	0	0	0	0	0	28.282	0	0	0	0	0	0	0	0	0	0	321.144	0	9.5	0	0	0	0	0	0	0	0	0	39.279	0	0	0	0	0	0	0	0	0
32707	SERPINA3 Alpha-1-antichymotrypsin	AKWEMPFDPQDTHQSR	1971.99	24.567	77.335	0	0	0	0	0	0	0	0	0	0	0	0	0	0	0	0	0	0	0	0	0	0	0	0	0	0	97.681	0	0	0	0	0	0	0	0	0	0	0	0	0	0	0	0	0
33490	SERPINA3 Alpha-1-antichymotrypsin	LYGSEAFATDFQDSAAAKK	2019	29.184	0	0	0	0	0	0	62.384	0	0	0	117.022	0	0	0	0	0	0	0	0	66.238	0	0	0	0	0	0	0	0	0	0	0	0	0	0	0	21.052	0	0	0	0	0	0	0	0	0
37610	SERPINA3 Alpha-1-antichymotrypsin	DYNLNDILLQLGIEEAFTSK	2295.26	36.235	0	0	0	0	0	0	311.925	207.959	321.04	134.074	54.567	0	76.149	75.428	0	0	230.691	267.447	134.5	232.696	0	0	0	0	104.537	63.683	0	203.497	135.019	297.861	348.104	0	390.3	0	45.7756	137.439	500.497	141.524	426.079	0	67.847	459.048	0	185.307	10.242
1081	Serum albumin	LSQRFPK	874.552	21.866	384.973	124.387	53.22	121.692	643.669	60.381	0	0	0	213.872	98.805	88.655	0	0	74.295	0	0	0	0	7.141	0	0	0	0	0	42.41	0	0	0	0	0	0	0	0	0	0	0	0	0	0	11.607	0	46.864	0	0
1198	Serum albumin	AEFAEVSK	879.491	28.88	1313.85	1325.32	1707.93	1480.47	5511.07	1374.12	2786.14	2846.15	833.172	2788.75	3308.53	1758.42	1583.91	1428.98	2595.03	3368.54	0	2053.3	1628.77	1633.3	0	0	1140.22	1271.33	0	1794.18	737.759	1008.52	1126.72	0	1807.71	2468.16	2235.94	0	0	1326.38	1802.23	1492	1256.81	3131.68	2128.75	1807.88	3307.54	0	2611.59
3473	Serum albumin	YLYEIAR	926.539	29.1	3299.99	3329.72	4262.93	3076.42	3876.34	1677.24	6438.19	3419.1	1955.81	4823.53	4926.77	2203.07	2985.24	2155.47	4859.82	2210.53	0	4622.29	3294.3	4134.99	0	0	2563	860.839	0	4656.88	3209.73	2632.2	3286.52	0	5087.9	4183.27	6544.46	0	0	3772.05	4607.24	3452.86	3510.23	9368.67	4239.09	3481.15	3337.54	0	3767.85
3997	Serum albumin	DDNPNLPR	939.501	30.239	961.999	1090.01	6862.71	918.759	3947.02	396.71	3030.8	6327.46	3597.85	3550.36	4293.28	3653.74	2533.34	2163.34	3866.04	4239.44	0	3710.49	4742.21	2286.22	0	0	3209.67	1732.44	0	2468.86	4189.52	1470.91	4096.93	0	4030.49	5654.73	4219.86	0	0	2187.13	3772.83	4511.95	4028.47	8088.86	5661.17	4566.1	5476.82	0	5398.47
4654	Serum albumin	DLGEENFK	950.502	30.362	158.939	131.167	990.7	380.698	0	33.474	869.047	3359.91	887.68	779.833	1324.67	887.556	868.185	540.983	524.667	0	0	2809.3	2383.98	948.211	0	0	746.158	0	0	0	1417.7	733.058	873.303	0	2092.49	434.712	2868.04	0	0	8.249	1734.25	1880.06	1745.09	4454.77	1967.38	2867.11	1304.82	0	1399.35
5027	Serum albumin	FQNALLVR	959.594	31.103	1.177	4.79	0	31.328	0	23.477	0	46.797	0	0	0	0	0	117.746	0	0	0	0	0	0	0	0	0	0	0	0	0	0	0	0	4.545	0	5.059	0	0	2.744	20.241	0	0	0	655.861	0	0	0	0
6592	Serum albumin	TYETTLEK	983.463	29.609	0	0	0	0	0	0	0	0	0	0	0	0	0	0	0	0	0	0	0	0	0	0	0	0	0	0	0	0	0	0	0	0	0	0	0	0	23.756	0	0	0	0	0	0	0	0
7585	Serum albumin	QTALVELVK	999.567	30.377	8425.19	8825.36	0	0	0	0	0	0	0	0	0	0	0	0	0	0	0	0	0	0	0	0	0	0	0	0	0	0	0	0	0	0	0	0	0	0	0	0	0	0	0	0	0	0	0
7745	Serum albumin	TPVSDRVTK	1001.52	22.876	0	0	0	0	0	0	0	0	0	0	0	0	0	0	0	0	0	8.66	0	0	0	0	0	0	0	0	42.672	31.924	0	0	0	0	0	0	0	0	0	0	0	0	0	0	0	0	0
8213	Serum albumin	LVAASQAALGL	1012.65	31.485	0	0	0	0	0	0	10.949	0	0	0	0	0	0	0	0	0	0	0	0	0	0	0	0	0	0	0	0	0	0	0	0	0	0	0	0	0	0	0	0	0	0	0	0	0	0
8397	Serum albumin	SLHTLFGDK	1016.58	25.252	0	43.311	0	0	0	0	0	0	0	0	0	0	0	0	0	0	0	0	0	0	0	0	0	0	0	0	0	0	0	0	0	0	0	0	0	0	0	0	0	0	0	0	0	0	0
8448	Serum albumin	AFKAWAVAR	1018.6	25.677	4.812	0	0	0	0	0	0	0	0	0	0	0	0	0	0	0	0	0	0	0	0	0	0	0	0	0	0	0	0	0	0	0	0	0	0	0	0	0	0	0	0	0	0	0	0
8661	Serum albumin	ccTESLVNR	1021.5	30.062	11.347	6.251	8580.7	34.897	5722.01	1738.83	15.396	0	2120.58	2768.03	3452.46	0	0	0	0	0	0	12.391	0	2061.76	0	0	0	0	0	9.977	0	39.723	0	0	0	43.538	37.752	0	2408.84	1830.55	894.728	44.593	0	0	0	0	3309.03	0	0
11435	Serum albumin	LDELRDEGK	1073.59	24.464	12091.5	13169.3	0	0	18301.8	2609.36	6293.84	334.466	8881.7	12926.7	18915.5	20324.6	9896.73	10461.7	11872.4	26065.5	562.27	0	0	1047.56	0	11374.8	9476.79	9247.98	0	10274.6	0	1977.9	5138.27	8920.21	761.191	11655.5	932.262	11151.2	0	5611.57	0	769.225	1214.03	0	11082.6	0	16254.7	0	16810.9
13564	Serum albumin	KQTALVELVK	1127.62	23.588	0	0	0	0	0	0	0	0	0	0	0	0	0	0	0	0	0	0	0	0	0	0	0	0	0	0	0	0	0	0	0	0	0	0	0	0	0	0	0	0	0	0	0	0	0
14226	Serum albumin	KLVAASQAALGL	1140.72	31.311	52.157	79.165	0	196.548	0	0	483.802	0	0	0	0	0	0	0	0	0	0	0	0	0	0	0	0	0	0	0	441.321	180.694	0	0	0	0	0	0	0	887.938	1044.23	0	0	1908.15	262.802	142.121	0	0	0
14438	Serum albumin	LVNEVTEFAK	1148.55	30.241	0	15.438	210.101	0	0	0	116.589	119.302	55.243	0	0	0	32449.8	0	0	0	0	124.428	0	68.271	0	10.3933	0	0	0	0	0	0	0	0	0	0	0	0	0	0	0	0	0	0	0	205.175	0	0	0
15697	Serum albumin	EccEKPLLEK	1188.62	24.8	338.512	0	1718.04	2161.08	0	0	602.65	2149.61	1269.96	1015.96	1334.23	2123.29	2158.56	1446.83	0	0	3096.65	2795.14	3279.08	1461.86	944.641	1060.8	355.152	0	0	0	0	0	0	0	1596.51	735.935	1444.9	1621.2	1049.6	401.624	256.442	2125.66	1596.21	932.233	1751.98	3751.39	0	1147	2055.26
16787	Serum albumin	FKDLGEENFK	1225.67	24.833	24696.4	23607.5	25119.8	43137.4	23819.5	9585.64	13758.9	4527.91	19819.4	19643.6	31703.3	38206.8	19908.1	16971.7	16769.5	17937.6	0	7182.76	8182.06	15115.9	19960	16176.5	23615.8	7634.76	27195.2	16945.7	11404	10059.7	0	17170.1	9898.47	19838	9129.5	19635.3	27087.3	10726.5	0	13060.4	11788.3	8212.02	17221.4	7715.43	27012.3	21928.8	21425.6
17556	Serum albumin	FPKAEFAEVSK	1251.57	24.389	0	0	107.766	48.294	0	0	0	0	0	0	0	0	0	0	0	0	0	0	0	0	0	0	0	0	0	0	0	0	0	0	0	0	0	0	0	0	0	0	0	0	0	0	0	0	0
17686	Serum albumin	AAFTEccQAADK	1254.57	31.779	4703.95	7130.26	11163.3	19693.9	2085.23	1784.87	2430.93	1873.39	3604.92	2943.36	3745.81	4171.42	0	2345.74	1326.65	1559.85	3059.42	2997.98	3152.87	2687.55	2864.57	2681.09	1703.59	0	1542.49	899.798	507.649	0	997.541	938.463	2107.04	2886.71	2956.61	2064.07	3386.23	2674.58	2957.25	3876.07	2354.31	4080.19	3486.01	3328.07	6525.05	4269.33	3321.14
19288	Serum albumin	HPDYSVVLLLR	1310.78	25.445	0	0	0	0	0	0	1394.96	168.154	1165.41	0	167.892	0	0	0	21.283	0	992.418	821.894	0	541.505	1118.86	0	0	0	0	0	0	0	0	2283.98	1493.85	0	505.029	2767.46	535.581	1999.3	0	0	768.35	0	0	0	0	93.4487	189.899
19474	Serum albumin	ETYGEMADccAK	1317.55	32.184	4772.92	4757.65	8247.01	9375.78	0	938.57	1629.32	688.753	1620.26	2184.47	1195.72	3384.98	1978.08	1079.31	0	0	2671.28	1627.91	1422.66	2390.28	1566.15	1972.34	930.068	0	0	0	0	0	0	64.0425	604.336	1648.45	755.104	2097.31	2548.99	1954.76	604.83	827.08	605.032	765.371	1196.91	1739.63	3384.07	3450.49	1905.38
19890	Serum albumin	ETYGEmADccAK	1333.56	32.298	20.267	422.646	1202.29	897.224	0	0	0	182.167	122.582	244.231	85.201	588.42	784.144	278.577	0	0	259.708	197.102	173.316	199.86	0	52.2713	0	0	0	0	0	49.806	0	0	142.701	486.672	166.455	209.433	427.86	125.734	244.13	219.089	141.519	0	207.956	265.001	812.823	484.323	731.824
20078	Serum albumin	AVMDDFAAFVEK	1341.53	31.525	0	103.384	106.756	0	0	0	0	0	0	0	0	0	0	0	0	0	0	0	0	0	0	0	0	0	0	0	0	0	0	0	0	0	0	0	0	0	0	0	0	0	0	0	0	0	0
20552	Serum albumin	AVmDDFAAFVEK	1357.7	32.435	713.397	2830.57	7410.11	4690.05	0	561.4	745.551	1712.56	704.39	869.588	793.845	2304.17	968.538	1468.49	5684.49	11029	648.712	1018.26	5232.2	738.403	0	372.841	3523.94	0	10893.2	1535.26	6835.51	5013.53	4634.74	3354.66	1728.13	7227.31	2349.25	1309.04	1469.84	1970.17	3904.24	7943.94	2214.55	3871.87	4711.55	1452.11	4864.08	1868.65	2171.87
21270	Serum albumin	TcVADESAENcDK	1381.59	31.783	15582.1	13242.9	40528.4	28140.1	3480.62	0	7217.53	6315.11	4124.52	6961.52	7656.81	7960.44	9857.26	6265.92	980.685	0	11551.7	5966.76	6037.2	6343.66	0	4620.92	894.752	0	1535.23	706.332	720.922	98.494	896.79	875.579	3845	2022.94	3837.03	5610.99	7133.01	5005.05	4883.95	5010.23	3500.82	4509.86	3509.24	7950.67	9676.41	8701.83	8339.5
22365	Serum albumin	LKEccEKPLLEK	1429.81	22.404	14569.1	19551.8	28591.7	32252	23065.1	7935.73	5568.14	1542.84	6343.76	14373.6	24782.9	20512.4	11032.1	9963.75	1980.98	0	5627.65	2421.24	2546.43	8010.42	14553.7	10305.1	4343.54	1057.19	2065.19	1272.25	358.562	124.692	1166.74	933.957	4565.88	0	4142.02	13467.7	15410	5252.12	0	1423.01	1096.55	1256.68	7658.33	2688.25	5261.48	13965.5	10263.9
23082	Serum albumin	RHPDYSVVLLLR	1466.73	20.137	5.981	0	0	0	0	0	4.513	0	0	0	0	0	0	0	0	0	0	0	0	0	0	0	0	0	0	0	0	0	0	0	0	0	0	0	0	0	0	0	0	0	0	0	0	0	0
23939	Serum albumin	VPQVSTPTLVEVSR	1510.78	32.551	0	0	0	0	0	0	0	0	0	0	0	0	0	0	0	0	0	0	0	0	0	0	0	0	0	0	0	0	0	8978.25	0	0	0	0	0	20.065	0	0	0	0	0	0	0	0	0
25710	Serum albumin	QNcELFEQLGEYK	1598.83	33.234	0	0	0	183.093	0	0	0	93.809	0	0	0	0	191.306	979.096	0	0	0	51.271	36.313	0	0	0	0	0	0	0	0	0	0	0	0	0	0	0	0	0	0	574.294	214.927	0	0	13.404	0	0	0
26292	Serum albumin	DVFLGMFLYEYAR	1622.86	36.372	0	8.408	0	0	0	0	0	38.055	0	0	0	0	0	0	0	0	0	33.535	40.176	0	15062.2	0	0	0	0	0	0	0	0	0	0	0	0	0	0	0	8.351	55.477	0	0	14.314	0	0	0	0
26585	Serum albumin	DVFLGmFLYEYAR	1638.73	32.982	0	0	0	0	0	183.425	0	0	0	0	0	0	0	0	0	0	0	0	0	0	0	0	0	0	0	0	0	0	0	0	0	0	0	0	0	0	0	0	0	0	0	0	0	0	0
26614	Serum albumin	KVPQVSTPTLVEVSR	1639.03	28.313	78902.6	82721.3	97747	59687.1	102193	27291.2	54034.6	25369.6	56161.2	61905.4	81957.5	94480.3	64384.5	71324.5	37781.4	2898.94	60482.8	40713.1	56972.3	58008.3	62326.1	60401.8	73900.5	34452.8	7167.77	63477.5	28802.5	4648.7	56478.4	61145.2	63270.9	62495.3	64946.6	74085.7	66703.8	50461.3	62128.7	96306.6	74920.1	43188.3	69579.6	36225.7	103796	71459	51711.1
26890	Serum albumin	AEFAEVSKLVTDLTK	1649.96	28.19	612.541	0	0	0	0	0	0	0	0	0	0	0	0	0	0	0	0	0	0	0	0	0	0	0	0	0	0	0	0	0	0	0	0	0	0	6.598	0	0	0	0	0	0	0	0	0
28680	Serum albumin	HPYFYAPELLFFAK	1741.95	27.459	3292.89	1134.73	2469.82	51.951	0	0	705.946	0	3081.72	232	196.372	0	448.934	0	0	0	1235.04	1612.86	424.879	1683.97	3279.35	9668.74	0	0	0	93.385	0	0	0	2461.63	3827.74	0	1085.23	11222	733.408	5986.45	0	0	4613.58	0	256.984	331.878	0	258.934	611.05
30394	Serum albumin	EQLKAVMDDFAAFVEK	1839.97	25.707	0	0	0	206.22	0	0	11.353	44.773	0	0	0	0	0	0	0	0	0	35.179	0	0	0	0	0	0	0	0	0	0	0	0	0	0	0	0	0	0	0	0	0	0	0	0	0	0	0
30603	Serum albumin	RPcFSALEVDETYVPK	1852	29.044	18.227	0	0	0	0	0	0	0	0	0	0	0	0	0	0	0	0	0	0	0	0	0	0	0	0	49.923	0	0	0	0	0	0	0	14.3415	0	0	0	24.73	15.372	0	0	26.427	0	0	0
30994	Serum albumin	SLHTLFGDKLcTVATLR	1873.08	23.933	0	0	0	0	0	0	0	113.346	0	0	0	0	0	0	0	0	0	0	0	0	0	0	0	0	0	0	0	0	0	0	0	0	0	0	0	0	0	0	0	0	0	0	0	0	0
31449	Serum albumin	RHPYFYAPELLFFAK	1898.05	25.835	0	0	0	0	0	0	0	0	0	0	0	0	0	0	0	0	0	0	0	0	0	373.536	0	0	0	0	0	0	0	0	0	0	0	164.721	0	0	0	13.364	0	0	0	0	0	0	0
31701	Serum albumin	VHTEccHGDLLEcADDR	1911.89	23.929	15.294	0	38.292	195.76	0	20.927	0	16.717	6.009	0	20.867	0	0	0	0	0	0	0	0	8.083	0	0	0	0	0	0	0	0	0	0	0	0	0	0	0	0	0	0	0	0	0	0	0	0	0
32168	Serum albumin	NEcFLQHKDDNPNLPR	1937.91	24.626	0	0	0	0	0	0	4.883	472.733	149.673	0	0	0	0	0	0	0	0	0	47.83	0	0	0	0	0	0	0	0	32.643	0	0	7.502	288.125	0	0	0	0	0	0	55.396	75.655	0	70.588	0	0	0
33864	Serum albumin	VFDEFKPLVEEPQNLIK	2044.18	32.644	9.762	0	0	0	0	0	3.851	22.451	16.907	0	0	0	0	0	0	0	0	9.247	0	15.582	0	0	0	0	0	0	0	0	0	0	0	19.224	0	0	0	0	0	0	0	0	0	21.215	0	0	0
35943	Serum albumin	EFNAETFTFHADIcTLSEK	2201.03	29.919	0	0	0	74.257	0	0	0	0	0	0	0	0	124.239	0	0	0	0	0	0	0	0	228.868	0	0	0	139.167	0	0	0	0	0	0	0	179.349	0	0	0	0	0	0	0	0	0	202.237	0
39334	Serum albumin	VHTEccHGDLLEcADDRADLAK	2410.16	22.8	0	0	0	0	0	0	0	0	0	0	0	0	0	0	0	0	0	0	0	0	0	0	0	0	0	0	0	0	0	0	0	0	0	0	0	11.889	0	0	0	0	0	0	0	0	0
39624	Serum albumin	ALVLIAFAQYLQQcPFEDHVK	2431.37	31.262	0	0	0	0	0	0	14.435	170.975	15.547	0	0	0	0	0	0	0	0	77.373	152.356	90.893	0	0	0	0	0	0	0	0	0	0	42.084	0	12.355	0	0	379.683	0	25.393	203.382	47.707	0	114.411	0	0	0
41701	Serum albumin	LVRPEVDVMcTAFHDNEETFLK	2591.38	27.075	0	0	0	0	0	0	0	0	0	0	0	0	0	0	0	0	0	0	127.124	0	0	0	0	0	0	0	0	0	0	0	0	0	0	0	0	73.93	0	0	0	36.709	0	7.518	0	0	0
41910	Serum albumin	LVRPEVDVmcTAFHDNEETFLK	2607.28	27.172	0	0	0	0	0	0	53.576	0	67.616	0	0	0	0	0	0	0	0	0	19.137	0	0	0	0	0	0	0	0	0	6.25	0	7.925	48.756	0	116.279	0	150.979	0	0	0	0	0	0	0	0	0
43183	Serum albumin	LVRPEVDVMcTAFHDNEETFLKK	2719.37	27.566	0	0	0	0	0	63.585	0	0	0	0	0	0	0	0	103.376	0	0	0	0	0	0	0	0	0	0	0	0	0	0	0	0	0	162.002	0	0	0	0	0	0	0	0	0	0	0	292.028
1349816	Serum albumin	KYLYEIAR	1054.53	23.338	0	0	0	0	0	0	0	0	0	0	0	0	0	0	0	0	0	0	0	0	0	0	0	0	0	0	0	0	0	0	861.576	0	0	0	0	0	0	0	0	0	0	0	0	0	0
12818	Titin	GTAIFAcDIAK	1107.56	33.252	0	69.729	0	0	0	0	0	0	0	0	0	0	0	0	0	0	0	0	0	0	0	0	0	0	0	0	0	0	0	0	0	0	0	0	0	0	0	0	0	0	0	0	0	0	0
13617	Titin	DATDLTRSPR	1130.58	24.666	2.835	0	0	0	0	0	7.053	0	3.347	0	0	118.223	0	0	0	0	0	9.2	0	5.153	0	0	0	0	0	114.564	0	0	105.195	0	0	0	0	0	0	0	0	0	0	0	0	0	0	0	16.834
15289	Titin	EGSQLEMKVR	1175.62	24.051	0	0	0	0	0	0	0	0	0	0	0	0	0	0	0	0	0	0	0	0	0	0	0	0	0	0	0	0	0	0	0	0	0	0	0	0	0	0	0	0	0	0	0	0	0
16269	Titin	VTVETHTKVAK	1211.59	21.105	0	0	0	0	0	0	0	0	0	0	0	0	0	0	0	0	0	0	0	0	0	0	0	0	0	0	0	0	0	0	0	0	0	0	0	0	0	0	0	0	0	0	0	0	0
16788	Titin	DQGEYRFIAK	1225.67	26.453	22.658	0	0	0	0	0	14.381	22.472	18.731	0	0	0	0	0	0	0	0	45.467	30.471	42.352	0	0	0	0	0	0	12.729	0	0	0	11.01	91.634	113.138	0	0	0	0	45.286	26.02	0	102.292	78.4	0	0	0
1350890	Titin	LITTcEcVVPNLK	1429.65	32.737	56.341	0	0	0	0	0	0	0	0	0	0	0	0	0	0	0	0	0	77.728	0	0	154.425	0	0	0	0	0	0	0	0	0	0	0	0	0	0	0	0	0	0	0	0	0	0	0
12843	Translational activator GCN1	FAGKVTTASVK	1107.59	23.719	80.251	69.289	0	26.986	0	0	22.266	0	19.216	59.848	37.816	0	0	0	44.918	0	0	0	0	51.695	0	0	0	0	53.0987	76.586	0	0	0	0	0	0	0	0	0	18.729	0	0	0	0	106.102	0	0	0	0
29831	Translational activator GCN1	VDENGPELLPRVAMLR	1808.08	28.973	213.468	157.737	0	29.408	0	0	911.586	0	335.596	0	0	0	0	0	0	0	384.952	710.3	0	229.617	0	3259.2	0	0	0	495.243	0	0	0	384.48	638.924	0	1441.4	1017.61	0	1297.45	0	0	628.179	0	0	299.749	0	0	0
20787	Transthyretin	GSPAINVAVHVFR	1365.81	25.821	1737.85	381.65	0	0	0	0	1506.81	93.516	550.61	55.731	0	0	0	0	0	0	627.134	829.513	992.795	849.655	1144.08	1021.01	0	0	2570.63	129.085	0	0	0	549.838	1899.83	0	626.207	1163.02	0	1479.89	0	0	2356.53	516.972	1008.62	287.98	0	131.941	0
21522	Transthyretin	AADDTWEPFASGK	1393.69	32.737	5738.48	3646.47	2147.98	6055.94	5933.52	1325.13	1929.62	3740.27	11.123	1634.01	1087.01	0	0	6718.57	0	6950.75	0	2927.11	2866.38	1449.84	0	0	0	0	0	461.439	0	697.706	0	0	1524.83	2554.15	0	1417.84	0	1527.14	3406.05	0	0	7103.7	5655.83	4124.84	3866.31	0	0
23599	Transthyretin	GSPAINVAVHVFRK	1493.91	22.799	267.795	0	0	0	0	0	0	0	0	0	0	0	0	0	0	0	0	0	0	0	0	0	0	0	0	0	0	0	0	0	0	0	0	0	0	0	0	0	0	0	0	0	0	0	0
24233	Transthyretin	KAADDTWEPFASGK	1521.8	27.102	3187.71	2157.85	381.354	0	4056.7	0	0	529.99	42.682	0	27.318	0	724.452	3770.45	0	5028.27	0	27.825	0	582.18	0	0	0	0	0	20.517	36.521	0	14.203	0	0	0	0	0	0	32.394	460.306	0	12.623	56.799	31.585	0	0	0	58.752
38695	Transthyretin	YTIAALLSPYSYSTTAVVTNPK	2359.35	36.052	360.784	85.855	0	80.407	0	0	1210.88	0	349.818	0	0	0	200.209	501.137	0	0	718.991	860.686	624.505	782.098	290.383	1041.92	0	0	0	33.587	34.269	0	46.513	440.967	965.597	0	957.7	588.876	249.134	612.045	1068.57	0	1096.64	0	198.462	636.324	0	105.018	0
39880	Transthyretin	ALGISPFHEHAEVVFTANDSGPR	2450.29	29.103	0	0	0	0	0	0	154.615	0	0	0	37.311	0	24.711	0	0	0	75.1037	59.038	0	149.262	0	0	0	0	0	0	0	0	0	37.383	156.614	0	123.849	338.72	0	306.899	216.48	0	230	0	0	110.692	0	0	0
41893	Transthyretin	ALGISPFHEHAEVVFTANDSGPRR	2606.28	25.243	0	113.249	0	0	0	0	0	0	0	0	0	0	0	0	0	0	0	0	0	0	40.6736	0	0	0	0	31.776	0	0	0	33.4772	0	0	0	0	0	0	0	0	0	0	0	0	0	0	0
47100	Transthyretin	TSESGELHGLTTEEEFVEGIYKVEIDTK	3139.26	29.469	0	0	0	0	0	0	0	0	0	0	0	0	0	0	0	0	0	0	0	0	1908.51	0	0	0	0	0	0	0	0	0	0	0	0	36.8257	0	0	0	0	0	0	0	0	0	0	0
118	Vitamin D-binding protein	EFSHLGK	816.469	23.216	7.721	24.177	5.943	69.933	0	0	24.293	44.501	42.388	38.584	0	0	14.974	0	80.061	0	0	61.167	48.606	28.519	0	0	0	0	0	125.043	95.471	53.118	76.189	0	51.494	0	62.931	0	0	26.305	0	0	0	0	33.817	33.984	0	0	0
1816	Vitamin D-binding protein	LcDNLSTK	891.461	29.897	0	0	0	0	0	0	0	0	0	0	0	0	0	0	0	0	0	0	0	0	0	0	0	0	0	0	0	37.91	0	0	0	0	0	0	0	0	0	0	0	0	0	0	0	0	0
2694	Vitamin D-binding protein	YTFELSR	914.451	29.065	0	0	0	0	0	0	5.609	0	0	0	0	0	0	0	0	0	0	0	0	0	0	0	0	0	0	0	7.921	0	0	0	0	18.682	0	0	0	0	0	0	0	0	0	0	0	0	84.274
3956	Vitamin D-binding protein	ELSSFIDK	937.537	29.126	0	0	0	0	0	0	16.797	61.814	9.206	23.197	0	0	131.845	0	0	0	0	38.157	0	15.806	0	0	0	0	0	9.603	58.991	142.228	38.348	0	34.891	0	0	0	0	0	34.124	0	0	0	0	14.275	0	0	0
4709	Vitamin D-binding protein	ELPEHTVK	951.557	22.942	0	0	0	0	0	0	0	573.699	0	21.186	0	0	0	0	0	0	0	22.313	0	0	0	0	0	169.241	0	0	0	0	0	0	0	0	27.83	0	0	0	0	0	0	0	0	0	0	0	0
15111	Vitamin D-binding protein	THLPEVFLSK	1169.68	24.471	0	0	0	0	0	0	0	0	54.897	0	0	0	0	0	0	0	0	0	0	0	0	163.109	0	0	0	0	0	0	0	0	0	0	0	0	272.299	0	0	0	0	0	0	0	0	0	0
17643	Vitamin D-binding protein	HLSLLTTLSNR	1253.65	25.622	0	0	0	12.047	0	0	0	0	0	0	0	0	0	0	0	0	0	0	0	0	0	0	0	0	0	0	0	0	0	0	0	0	0	0	0	0	0	0	0	0	0	0	0	0	0
21422	Vitamin D-binding protein	VMDKYTFELSR	1387.74	26.243	326.294	0	0	0	0	0	159.865	0	519.865	0	0	494.228	0	0	0	0	89.4644	378.028	0	0	0	0	0	0	0	0	0	0	0	0	58.897	0	0	319.562	671.046	56.948	0	0	0	0	0	0	0	0	0
27662	Vitamin D-binding protein	KFPSGTFEQVSQLVK	1693.98	27.612	517.731	0	0	155.74	0	0	200.088	0	0	0	0	0	0	0	0	0	392.789	234.283	0	487.044	0	0	0	0	0	0	0	0	0	0	511.352	0	0	0	0	0	0	0	305.883	0	0	168.613	0	0	0
1074	Vitronectin	QPQFISR	874.503	28.032	0	0	0	0	0	12.383	13.695	20.537	0	0	0	0	0	0	0	0	0	0	5.299	6.887	0	0	0	0	0	6.88	0	0	0	0	0	0	0	0	0	10.407	0	8.214	0	0	0	0	0	0	10.55
22205	Vitronectin	FEDGVLDPDYPR	1421.74	32.848	0	0	0	0	0	0	0	0	0	0	0	0	0	0	0	0	0	815.831	0	1115.43	0	0	953.822	0	0	32.457	236.255	190.745	0	0	130.476	0	0	0	0	0	0	1236.82	0	2100.95	0	38.318	1344.09	0	0
26799	Vitronectin	DVWGIEGPIDAAFTR	1645.89	34.385	0	0	0	0	0	0	2.466	35.495	0	134.354	51.571	58.421	0	0	70.159	0	144.349	108.196	58.636	0	0	0	0	0	129.472	91.856	0	0	90.061	0	0	91.284	221.708	141.617	75.0229	126.793	240.764	97.554	0	188.74	58.012	111.648	0	80.7964	177.492
27155	Vitronectin	DWHGVPGQVDAAMAGR	1665.88	28.298	91.279	0	0	0	0	0	75.358	0	0	0	0	0	0	0	0	0	0	0	0	42.071	0	0	0	0	0	0	0	0	0	0	0	0	0	79.2171	0	42.319	0	0	0	0	0	0	0	0	0
13517	Zinc-alpha-2-glycoprotein	AGEVQEPELR	1126.61	31.081	0	5.123	0	0	0	0	65.087	0	171.305	0	0	0	0	0	116.627	0	0	0	272.85	75.651	0	0	0	0	0	123.699	136.887	70.047	0	0	0	0	0	0	0	0	0	0	111.487	182.284	601.046	0	444.617	0	552.15
29244	Zinc-alpha-2-glycoprotein	QDPPSVVVTSHQAPGEK	1774.98	29.048	6.908	0	0	0	0	0	59.104	0	81.909	28.561	0	0	38.83	0	0	0	0	40.435	15.172	22.201	0	0	0	0	0	0	0	0	15.826	0	17.438	0	23.614	136.342	0	126.837	18.251	20.415	0	71.648	21.601	0	0	0	0
29355	Zinc-alpha-2-glycoprotein	EIPAWVPFDPAAQITK	1781.84	33.379	0	0	0	0	0	0	28.397	0	0	0	0	0	0	0	0	0	0	0	0	0	0	0	0	0	0	0	0	0	0	0	10.692	0	0	0	0	0	0	46.939	0	0	0	0	0	0	0
[truncated: 23 more columns]

## Sheet: Raw Data-combined intesities
UniProt	Protein (IPI database)	Proteomic Analysis (signal intesity)																																														Biomarker Validation (signal intensity)
		Controls																CRVO														H-CRVO						BRVO										Controls
		Sample 1	Sample 2	Sample 3	Sample 4	Sample 5	Sample 6	Sample 7	Sample 8	Sample 9	Sample 10	Sample 11	Sample 12	Sample 13	Sample 14	Sample 15	Sample 16	Sample 1	Sample 2	Sample 3	Sample 4	Sample 5	Sample 6	Sample 7	Sample 8	Sample 9	Sample 10	Sample 11	Sample 12	Sample 13	Sample 14	Sample 1	Sample 2	Sample 3	Sample 4	Sample 5	Sample 6	Sample 1	Sample 2	Sample 3	Sample 4	Sample 5	Sample 6	Sample 7	Sample 8	Sample 9	Sample 10	Sample 17	Sample 18
																		fresh	old	old	old	fresh	fresh	fresh	fresh	fresh	fresh	old	fresh	fresh	fresh	old	fresh	fresh	fresh	old	fresh	fresh	fresh	fresh	fresh	fresh	old	fresh	fresh	fresh	old
P43652	Afamin	120.786	71.416	0	0	49.504	6.592	14.509	20.027	31.222	64.937	154.27	72.738	24.686	0	152.331	0	0	18.193	15.508	15.83	35.119	9.264	81.95	0	47.24	29.59	6.654	583.967	11.855	0	18.345	0	0	37.416	12.884	0	0	0	0	20.381	58.652	11.58	0	15.615	0	7.01	130.495	210.821
P02763	Alpha-1-acid glycoprotein 1	107.232	64.581	16.506	91.256	0	14.745	79.822	102.713	135.726	157.437	114.642	93.364	119.099	23.37	92.916	0	118.255	155.669	143.22	132.402	209.994	444.984	103.172	0	168.998	218.818	287.753	40.786	76.119	6.713	372.092	0	96.745	145.317	462.428	98.278	16.933	12.1	109.045	0	330.211	223.883	108.652	21.458	184.922	39.162	0	264.165
P19652	Alpha-1-acid glycoprotein 2	130.897	225.082	123.34	78.494	0	0	51.984	18.069	91.228	98.265	127.581	0	56.306	19.193	76.64	0	100.654	78.672	97.176	62.229	125.91	90.713	43.348	0	267.058	207.795	250.823	58.226	68.816	72.223	161.567	0	103.058	103.501	74.375	39.134	0	16.227	0	73.445	139.553	43.23	78.745	156.206	76.312	13.43	49.347	38.823
P01009	Alpha-1-antitrypsin	351.56	375.113	131.826	410.484	68.67	97.15	239.343	329.308	283.098	313.39	318.847	331.56	307.485	307.517	317.232	176.52	319.245	285.707	180.433	217.525	288.198	361.665	319.249	32.09	187.028	246.169	401.767	240.654	300.959	109.35	319.045	335.822	236.267	288	319.953	139.528	155.891	150.876	209.683	786.894	315.576	287.007	656.41	226.695	336.511	374.064	226.644	140.097
P04217	Alpha-1B-glycoprotein	0	8.191	0	57.815	0	16.814	0	0	8.908	0	0	0	0	0	0	0	0	0	0	0	0	130.682	0	0	0	0	0	0	0	0	0	9.267	26.422	0	0	0	23.876	0	0	73.251	0	18.197	0	0	0	0	85.402	0
P02765	Alpha-2-HS-glycoprotein	0	5.822	9.675	0	0	0	16.846	20.864	0	30.657	61.841	0	0	9.737	9.751	0	0	17.092	16.801	9.315	0	15.351	0	0	0	11.617	0	0	0	0	5.644	0	0	4.893	0	0	0	0	9.218	25.647	0	11.589	44.881	0	0	0	0	0
P01023	Alpha-2-macroglobulin	7.265	26.21	19.237	7.414	0	15.062	14.539	45.065	12.727	17.489	24.121	45.621	36.605	17.979	27.654	60.288	1.229	17.597	24.238	8.886	7.686	26.36	40.874	121.591	9.766	26.636	19.535	497.159	17.056	10.971	20.516	82.38	1585.41	20.673	33.769	2.73	18.231	49.261	2.999	72.679	16.815	20.854	54.093	4.756	64	52.186	16.441	33.654
P02511	Alpha-crystallin B chain	4.566	4.795	96.901	0	55.257	21.753	0	0	2.8	0	0	0	0	0	295.147	0	0	0	0	0	0	0	0	0	0	5.672	0	38.951	0	0	0	0	0	0	0	0	0	0	0	0	0	0	0	0	12.044	0	36.025	85.357
Q06481	Amyloid-like protein 2	34.356	2.765	0	11.281	0	4.537	2.362	20.036	5.113	5.905	0	0	0	0	2.793	0	0	1.329	0	10.994	0	0	0	28.012	0	4.968	3.724	0	9.983	0	0	148.356	7.846	3.334	0	0	0	0	0	15.668	3.332	7.08	0	0	19.396	10.401	0	78.944
P01019	Angiotensinogen	247.231	166.97	0	223.051	0	0	0	38.931	0	40.068	21.814	0	0	21.609	37.477	0	0	0	0	43.893	29.122	43.011	11.536	0	0	21.562	11	0	16.019	0	0	15.277	0	0	0	0	138.41	0	0	0	0	0	0	0	121.504	0	0	12.056
P01008	Antithrombin-III	31.204	30.438	6.103	41.413	0	69.651	79.352	82.12	69.077	66.05	44.386	33.085	61.999	101.969	85.873	0	91.124	92.121	52.897	79.159	43.003	95.185	0	0	100.337	33.629	46.336	26.729	100.883	63.382	109.972	52.428	135.226	53.868	74.345	80.781	102.222	39.641	72.293	114.048	59.883	70.925	123.097	68.189	64.217	87.349	0	16.644
P02647	Apolipoprotein A-I	321.318	136.721	44.768	213.676	43.706	24.333	230.9	151.24	178.107	217.504	161.189	125.627	217.68	91.721	113.908	0	192.519	188.705	266.852	122.23	242.587	277.741	84.112	8.503	114.538	90.864	258.884	282.89	117.279	72.142	254.159	142.651	314.058	204.449	209.144	133.643	253.633	241.799	190.221	269.289	188.6	183.96	87.23	123.475	199.28	217.839	34.8	94.669
P02652	Apolipoprotein A-II	201.065	43.708	60.295	175.863	0	9.073	135.394	84.796	2.231	78.491	0	0	0	0	10.555	0	0	35.807	31.85	45.141	0	0	0	0	0	0	0	0	26.639	0	0	0	7.861	11.408	0	0	25.584	0	0	0	14.342	43.889	0	0	0	1.213	0	61.719
P06727	Apolipoprotein A-IV	25.201	16.064	105.607	18.431	16.418	1431.49	17.37	351.768	20.557	26.632	54.304	67.418	9.067	10.978	53.36	133.329	52.874	71.803	78.188	15.134	9.644	10.419	28.944	129.41	21.441	15.052	32.468	1.426	28.906	5.586	43.442	77.591	71.15	34.185	51.551	9.156	85.86	82.293	60.75	128.705	87.998	73.845	25.347	9.124	13.473	53.476	3.537	1535.93
P02649	Apolipoprotein E	57.789	96.218	60.947	170.986	8.748	75.537	2.201	236.545	63.454	71.184	227.575	336.471	24.158	347.912	14.468	0	0	15.793	32.666	0.689	11.341	0	11.088	281.625	8.248	404.342	26.868	136.381	0.565	0	222.072	382.111	181.23	15.999	17.538	0	228.117	363.997	199.324	474.252	82.973	168.647	70.13	9.303	21.935	324.826	5.685	21.47
P02749	Beta-2-glycoprotein 1	0	0	0	7.389	0	51.184	0	9.115	0	0	0	0	0	5.977	0	0	0	4.828	0	1.747	0	4.189	0	0	0	0	0	0	0	0	0	0	0	3.319	0	0	0	0	0	0	0	0	0	0	0	0	0	0
P43320	Beta-crystallin B2	0	0	0	20.184	0	0	0.959	3.234	0	0	0	0	7.841	0	159.76	0	0	76.653	130.209	0	0	0	0	68.516	0	9.78	14.975	19.851	0	0	0.953	0	56.615	0	0	0	0	76.747	0	0	0	94.295	0	0	0	0.916	13.547	0
Q9P1Y5	Calmodulin-regulated spectrin-associated protein 3	0	19.436	0	0	0	0	2.543	0	3.405	0	0	0	0	0	0	0	0	0	0	0	0	0	0	0	0	0	0	0	0	0	0	766.135	0	0	0	0	513.41	0	0	0	0	0	0	0	0	0	0	0
Q9NY41	Cartilage glycoprotein-39	8.57	12.788	0	36.697	0	0	38.441	5.789	6.426	0	0	0	1.118	0	0	0	0	0	8.827	2.841	0	0	0	0	0	0	8.836	0	4.689	0	4.848	0	2.335	8.401	0	0	3.91	0	0	21.308	7.959	0	0	0	5.512	10.405	0	0
P07339	Cathepsin D	6.255	84.392	256.724	7.672	1815.59	7.894	58.085	132.291	92.52	79.87	143.817	175.176	0	194.868	1159.49	4647.53	39.1	121.096	85.334	57.194	0	13.562	662.296	2482.34	667.814	118.519	257.249	168.867	717.404	4.664	6.292	77.597	117.248	127.467	48.505	9.29	141.236	41.299	88.307	62.002	253.232	118.381	448.048	59.894	168.072	99.322	538.581	636.677
P00450	Ceruloplasmin	95.657	154.912	2.73	25.086	0	5.644	106.641	15.624	139.43	195.333	93.347	145.106	166.667	186.832	713.078	467.952	15.253	223.128	149.395	133.001	149.643	143.432	719.88	136.695	669.757	158.846	8.524	208.856	635.216	464.235	142.32	13.02	121.913	211.239	219.072	203.921	159.766	132.269	106.07	7.079	161.971	116.054	207.447	184.125	233.67	184.851	5.811	0
P10909	Clusterin	254.1	403.369	227.316	542.487	18.505	0	315.741	215.28	263.498	476.872	185.288	297.767	213.89	540.143	501.952	61.268	452.965	454.627	476.224	342.452	469.298	624.268	338.205	802.704	763.709	651.073	278.995	173.383	344.075	653.062	330.238	350.845	1005.4	501.117	669.076	565.556	928.619	472.097	470.095	742.221	337.557	525.372	347.161	633.13	499.922	519.466	172.627	113.746
P02452	Collagen alpha-1(I) chain	17.934	38.839	0	0	0	0	2.744	0	0	0	0	0	22.425	0	0	0	8.137	19.32	32.22	0	0	0	0	0	0	0	0	21.09	0	0	11.68	19.689	7.194	0	0	14.703	0	27.139	12.034	11.389	9.09	30.895	0	0	5.646	0	0	0
P02458	Collagen alpha-1(II) chain	5.05	18.789	48.13	16.181	0	4033.32	26.645	1296.6	26.729	18.703	82.02	35.858	42.791	28.382	111.109	147.82	27.07	31.029	193.348	10.438	42.486	1.83	25.134	288.304	75.364	11.42	219.158	699.27	48.876	32.038	30.947	140.266	54.109	70.961	24.589	25.135	65.562	172.13	87.565	63.872	138.551	29.094	81.068	37.032	85.604	57.762	111.341	2711.65
P02461	Collagen alpha-1(III) chain	0	0	0	0	0	80.714	74.867	138.976	60.111	49.128	21.285	12.27	26.068	80.598	62.398	0	98.676	143.855	121.94	280.639	0	0	0	0	39.466	72.76	121.051	47.552	330.474	237.038	1.563	148.036	125.031	35.961	0	49.202	195.759	90.865	90.994	259.606	0	125.687	0	69.98	40.614	74.318	103.14	0
P20908	Collagen alpha-1(V) chain	19.526	11.025	0	3.815	0	2.401	0.55	229.59	33.53	21.532	32.78	42.803	558.684	30.734	47.85	0	24.396	16.703	18.424	2.768	54.985	0	0	0	0	3.596	1.498	0	77.89	0	30.745	36.536	68.817	48.841	0	24.018	77.697	51.832	48.88	52.524	21.141	0	122.446	53.768	103.907	114.882	0	0
Q02388	Collagen alpha-1(VII) chain	0	0	26.462	0	0	4.86	8.799	9.917	0	0	0	0	24.378	62.361	36.253	229.291	0	0	0	0	0	0	0	398.07	0	0	60.51	0	0	0	13.52	0	0	3.079	0	0	0	0	0	0	0	0	0	0	0	403.283	0	0
P20849	Collagen alpha-1(IX) chain	2.151	0	19.786	1.521	0	692.443	7.203	357.66	5.115	4.704	1.78	0	9.532	40.511	27.668	0	0	6.802	19.231	2.884	0	5.773	0	161.536	0	20.971	11.856	28.347	4.475	0	10.291	75.999	56.844	30.793	0	0	20.168	13.58	4.922	20.251	15.646	6.065	12.882	0	0	38.51	0	136.162
P12107	Collagen alpha-1(XI) chain	10.684	1.568	0	0	0	1724.87	0.527	575.055	0.482	0	0	0	14.612	0	5.057	0	0	0	51.943	1.262	0	0	0	0	1314.52	0	0	0	0	1192.42	2.596	14.988	5.15	4.514	0	0	17.671	2.887	0	13.906	2.175	7.317	0	0	0	15.525	0	48.07
Q99715	Collagen alpha-1(XII) chain	3.986	0	0	0	0	49.149	1.09	35.132	7.824	0	0	0	0	0	0	0	0	24.682	5.995	29.559	0	0	0	0	0	14.733	0	0	17.67	0	15.32	11.782	0	18.726	0	0	58.026	0	47.25	48.545	63.74	10.599	0	0	33.04	0	0	0
Q8NFW1	Collagen alpha-1(XXII) chain	1.067	0	0	0	0	29.237	10.412	20.759	63.732	21.038	9.457	0	1.217	0	66.301	0	0	9.232	0	9.245	0	32.234	33.719	0	0	129.376	117.976	67.592	0	0	24.25	14.372	14.182	76.308	7.244	0	0	0	5.866	0	35.704	12.528	77.908	0	7.601	46.072	0	0
Q17RW2	Collagen alpha-1(XXIV) chain	0	0	16.366	0	0	82.442	6.512	0	0	0	0	0	0	0	0	0	0	0	0	0	0	0	0	0	0	0	0	0	0	0	0	0	0	57.26	0	0	0	0	0	0	0	0	0	0	0	0	0	0
Q8IZC6	Collagen alpha-1(XXVII) chain	0	0	0	0	0	3388.44	0	729.09	0	0	0	0	0	0	0	0	0	0	0	0	0	0	17.479	0	0	0	0	0	0	0	3.98	0	2.396	11.693	0	0	0	0	0	0	0	0	0	0	0	0	0	2183.92
Q2UY09	Collagen alpha-1(XXVIII) chain	0	0	0	0	0	0	0	269.906	0	0	0	0	0	0	0	0	0	0	0	0	0	0	0	0	0	0	0	0	0	0	0	0	0	60.551	0	0	0	0	0	0	0	0	0	0	0	0	0	0
P08123	Collagen alpha-2(I) chain	0	17.632	0	0	0	0	14.293	24.447	13.165	2.071	0	0	10.069	0	0	0	0	11.032	32.296	19.157	0	0	0	0	0	445.375	56.013	37.98	37.521	0	22.399	26.307	35.901	16.586	0	0	26.307	27.656	13.962	17.004	0	16.911	0	0	24.782	29.69	0	0
Q14055	Collagen alpha-2(IX) chain	0	0	35.946	0	0	1770.92	1.118	318.543	0	0	0	0	0	0	19.411	0	0	0	0	0	0	5.109	0	480.2	0	0	0	0	0	0	2.414	18.542	0	0.708	0	0	0	0	0	0	0	0	0	0	0	9.722	0	994.636
P13942	Collagen alpha-2(XI) chain	93.637	114.51	0	105.495	0	0	191.518	239.556	441.015	450.816	476.388	287.915	220.354	73.301	1629.51	1708.94	96.481	287.713	306.285	162.979	374.393	278.621	1620.28	628.21	2304.15	2042.77	2170.75	1601.84	1511.74	1972.32	324.378	382.679	334.079	417.189	353.317	418.448	160.211	435.643	346.993	805.91	808.284	163.456	542.24	421.164	425.969	513.461	113.672	0
Q14050	Collagen alpha-3(IX) chain	307.634	271.221	13.168	59.809	0	152.821	207.089	158.305	175.48	0	0	0	264.814	414.962	0	467.213	0	1.768	41.215	163.078	0	274.913	0	42.473	0	144.976	41.982	4.093	284.51	414.908	0	0	0	185.208	0	0	81.486	19.585	32.398	12.774	33.944	117.936	0	0	41.088	0	168.554	276.164
P53420	Collagen alpha-4(IV) chain	0	12.319	0	0	0	0	0	19.454	0	0	0	0	0	0	0	0	0	0	0	0	0	0	0	0	0	0	0	0	0	0	0	0	0	38.964	0	0	0	0	0	0	0	0	0	0	0	0	0	0
P29400	Collagen alpha-5(IV) chain	25.771	43.082	1446.36	127.433	380.498	104.867	69.527	436.233	58.853	92.313	118.994	312.358	7.387	201.912	258.14	540.54	18.724	103.899	746.561	57.831	311.393	0	144.692	586.075	709.66	0	633.56	224.997	61.429	25.308	273.459	221.75	192.64	217.824	0	0	263.535	1004.2	172.993	242.234	362.383	184.201	705.385	70.361	0	0	997.245	0
P01024	Complement C3	225.702	287.523	192.517	379.183	76.92	48.125	446.069	304.317	428.699	650.331	469.942	520.444	545.826	635.69	684.187	347.656	426.444	457.379	400.634	461.779	670.42	745.131	699.026	340.132	670.58	409.564	814.083	397.784	730.809	744.031	496.357	565.648	535.878	632.86	707.223	683.245	612.788	418.715	516.36	684.429	599.885	464.087	503.739	782.55	699.921	598.74	259.919	108.796
P0C0L4	Complement C4-A	1.966	0	0	0	0	311.363	0	20.098	21.299	5.157	85.638	22.522	0	0	0	0	0	0	0	0	0	0	0	0	0	0	0	0	0	0	36.429	0	0	8.407	0	0	7.805	0	0	7.684	0	0	0	0	0	0	0	36.001
P0C0L5	complement component 4B preproprotein	24.151	33.427	2.174	0	21.692	0.898	36.385	70.861	13.604	6.449	1.268	0	1.823	12.571	65.65	0	3.849	48.655	11.426	29.186	17.625	0.582	5.775	40.167	0	6.963	40.022	2.917	26.961	0	11.587	34.406	16.516	23.402	18.332	0	9.105	13.702	12.431	66.998	24.615	15.403	10.345	0	45.174	5.169	3.759	10.003
P02748	Complement component C9	266.409	216.791	0	92.434	771.36	0	267.239	368.744	181.317	283.608	316.716	288.42	130.999	284.4	454.171	0	220.128	387.777	438.607	103.063	202.853	78.375	263.61	231.632	388.678	412.764	0	0	279.726	147.395	174.716	453.073	427.931	204.735	168.724	212.515	181.96	281.037	254.086	182.062	567.258	215.869	803.485	165.947	560.395	403.165	442.219	690.191
P00751	Complement factor B	19.6	0	29.09	81.51	0	0	13.164	10.315	0	62.059	140.966	91.383	0	20.56	32.518	217.155	0	15.245	0	4.809	47.794	0	0	0	0	16.266	72.279	9.847	12.38	7.131	0	0	0	0	7.42	0	0	0	0	0	0	6.003	327.285	0	10.372	7.088	30.258	150.108
P01034	Cystatin-C	44.19	20.752	0	0	121.785	0	87.161	89.888	75.436	70.867	22.023	30.783	37.227	30.26	7.392	0	378.543	26.82	9.862	70.908	95.725	5.537	0	353.4	35.204	2.38	47.949	7.466	16.044	4.806	7.907	21.679	2.471	8.476	27.671	16.796	0	0	5.521	0	61.905	39.943	42.291	0	94.384	67.719	994.095	636.988
Q9UBP4	Dickkopf-related protein 3	80.307	136.431	139.642	189.653	244.9	16.945	61.971	101.985	39.86	204.482	48.143	153.704	0	588.152	72.618	0	44.111	89.47	55.612	31.063	30.745	0	226.11	513.084	124.218	37.584	112.619	34.536	18.737	0	40.898	88.949	55.821	63.174	21.183	0	141.513	55.315	44.128	171.754	68.005	115.046	76.168	87.093	164.675	269.426	281.43	417.125
P02671	Fibrinogen alpha chain	15.094	0	0	0	0	0	4.929	18.764	21.712	0	125.241	6.7	0	0	0	0	0	13.172	9.13	24.456	0	9.044	0	0	0	22.573	0	10.161	0	0	9.267	26.313	13.804	14.174	35.034	13.367	0	0	0	0	0	26.194	0	34.808	2.582	4.133	206.24	0
P02675	Fibrinogen beta chain	6.011	1.364	0	47.287	0	35.218	0.879	13.339	6.064	0	0	0	0	0	0	0	0	70.933	148.908	17.911	11.486	0	0	0	14.003	0	7.662	38.921	35.937	8.468	33.373	11.489	0	22.076	23.12	0	113.341	65.146	33.563	70.52	0	93.178	0	0	0	0	0	16.724
Q9UM11	Fizzy-related protein homolog	0	0	0	0	0	0	4.839	6.519	3.394	4.951	8.278	0	0	0	15.199	0	0	18.496	6.071	9.815	0	0	0	0	0	13.32	11.448	7.579	19.46	0	10.861	0	45.402	1.65	0	0	0	0	0	0	0	0	0	0	15.52	12.901	0	0
P06396	Gelsolin	9.649	25.044	0	7.6	0	273.453	29.24	8.802	20.427	7.493	31.138	11.077	14.211	0	34.216	0	27.386	48.504	0	22.777	16.717	44.763	0	0	40.029	10.484	7.473	0	53.974	19.313	38.519	0	213.735	20.744	56.881	0	11.239	0	0	0	0	38.993	0	0	113.214	0	78.224	80.85
P22352	Glutathione peroxidase 3	18.074	0	0	10.121	0	12.797	1.187	706.548	122.393	82.882	24.835	73.435	6.86	165.407	34.007	0	83.338	124.126	180.968	49.247	0	23.896	11.108	293.566	0	0	8.417	0	63.219	3.197	185.768	85.635	136.198	140.885	6.121	0	173.503	107.457	47.575	204.223	165.008	166.997	201.89	0	162.953	27.306	0	73.892
P00738	Haptoglobin	49.558	38.517	0	0	27.858	20.634	110.407	0.834	52.501	185.099	0	0	2.202	0	1.387	0	23.216	49.964	71.619	0.477	47.091	0	0	0	3.811	7.846	1.081	3.88	0	0	50.996	21.37	46.406	3.55	23.183	0	3.486	77.221	53.08	15.549	14.683	221.496	95.848	6.017	444.613	198.029	5.965	25.065
P68871	Hemoglobin subunit beta	0	0	0	0	0	0	4.281	550.899	33.572	5.414	0	0	4.035	13.879	5.174	0	0	37.615	90.401	40.247	0	0	0	0	0	40.885	0	0	0	2149.55	0	0	85.021	0	0	0	0	77.371	86.455	36.401	36.836	84.751	64.031	0	10.598	4.267	0	22.503
P02790	Hemopexin	217.056	146.663	43.18	65.382	0	5.187	112.729	201.072	170.799	212.801	266.502	275.919	195.055	150.086	185.921	300.563	124.853	136.789	127.533	100.48	131.734	122.601	162.81	115.608	59.877	300.385	198.125	223.119	145.887	86.048	206.488	209.024	115.463	64.737	131.308	88.234	72.369	105.574	103.282	49.508	147.294	190.761	160.407	72.887	140.144	117.951	4.616	16.343
P05546	Heparin cofactor 2	10.155	6.276	0	4.297	0	0	0.752	0	0	0	0	0	0	0	0	0	0	2.433	0	0	0	0	0	0	0	0	0	0	0	0	7.688	0	5.419	0	0	0	0	23.158	0	0	0	0	0	0	0	0	0	18.733
P04196	Histidine-rich glycoprotein	0	61.416	0	0	0	0	0.849	40.327	0	0	0	0	8.49	0	0	0	0	5.703	0	0	0	0	0	0	131.743	0	0	0	0	0	0	0	0	0	0	69.234	0	11.035	20.112	0	0	0	0	0	0	0	22.801	0
P01876	Ig alpha-1 chain C region	0	0	35.939	0	0	0	0.624	0	4.086	0	0	0	0	58.36	156.728	0	0	20.284	0	7.27	0	0	23.229	0	0	110.106	0	0	0	0	17.181	297.297	59.716	11.761	0	122.913	0	51.111	7.168	366.988	0	0	129.116	0	0	0	0	0
P01877	Ig alpha-2 chain C region	320.05	145.047	0	103.432	0	0	78.48	182.448	106.171	51.524	92.933	65.532	0	25.878	175.898	0	63.326	101.971	160.127	56.63	620.413	537.816	0	0	0	28.271	5.974	0	95.469	58.701	83.217	0	301.028	144.158	191.893	118.678	170.098	70.259	117.139	124.998	112.29	115.254	275.568	99.36	222.813	94.737	63.867	110.03
P01857	Ig gamma-1 chain C region	963.348	1754.84	647.829	1049.81	383.816	116.222	694.548	349.818	523.821	845.974	887.384	709.14	752.149	342.148	1542.38	51.083	304.727	875.098	866.947	1094.3	452.54	1302.3	119.567	487.213	446.933	1568.95	527.168	79.567	834.825	608.167	703.3	880.108	1218.05	924.706	671.148	562.236	923.528	1084.26	791.724	734.75	968.136	863.992	1254.42	376.789	1359.02	747.379	911.28	715.648
P01859	Ig gamma-2 chain C region	6.857	12.305	35.293	3.025	343.04	17.858	0	90.845	19.569	37.703	54.697	56.806	25.269	105.417	231.409	0	0	32.547	36.956	23.919	0	0	72.065	168.308	103.069	0	15.758	60.377	31.572	106.455	5.318	29.663	11.653	0	0	0	0	14.357	12.695	27.206	49.089	15.978	82.128	0	95.423	60.424	0	164.93
P01860	Ig gamma-3 chain C region	0.545	2.017	0	0	0	290.418	20.277	56.011	0	0	258.381	0	11.966	0	115.886	0	0	0	0	24.57	0	50.967	147.947	0	0	16.822	256.888	341.233	0	0	160.996	0	0	0.434	18.736	0	0	0	0	193.874	21.792	0	107.048	0	0	0	31.225	0
P01781	Ig heavy chain V-III region GAL	0	8.965	0	0	175.548	192.614	81.171	56.88	21.637	0	0	0	0	107.69	0	0	8.541	72.752	0	78.04	0	0	0	0	84.598	0	4.514	0	1.061	0	0	0	0	0	28.455	0	0	0	0	0	0	15.157	0	30.171	11.307	4.901	0	105.54
P01834	Ig kappa chain C region	0	249.174	0	0	0	0	116.247	18.337	123.9	187.919	162.611	160.282	10.536	174.492	260.043	308.67	0	49.25	40.915	384.539	0	7.162	94.907	56.258	0	377.742	64.224	106.352	95.832	101.708	32.153	215.604	78.13	441.395	34.225	130.236	5.295	36.302	100.921	200.768	173.592	44.521	233.293	49.679	118.333	139.891	0	0
P01598	Ig kappa chain V-I region EU	0	0	0	0	0	0	0	13.415	8.818	0	26.601	0	0	0	0	0	0	0	25.69	0	0	0	0	160.829	0	0	0	0	17.336	0	0	0	0	8.302	0	0	0	0	0	0	0	0	0	0	0	0	0	0
P0CG05	Ig lambda-2 chain C regions	442.748	847.85	0	754.012	0	0	444.485	271.147	493.092	557.335	728.657	644.853	717.617	735.843	605.569	0	0	446.933	754.317	775.387	0	0	429.877	560.814	1726	981.892	732.428	45.777	330.944	0	448.972	539.792	1038	1322.41	0	756.833	1872.58	987.473	881.153	1329.13	521.867	509.023	1434.03	664.137	1423.7	1011.12	253.191	35.911
Q9Y6R7	IgGFc-binding protein	30.122	30.774	783.738	268.297	0	116.006	10.726	62.47	28.141	48.377	136.888	111.985	807.03	0	7.372	461.56	5.535	23.294	0	20.87	142.789	8.331	68.426	410.74	0	0	40.091	1661.98	0	0	37.516	0	30.427	0	0	0	115.786	32.889	63.202	406.415	48.87	62.961	123.049	57.08	155.788	0	148.899	93.643
B9A064	Immunoglobulin lambda-like polypeptide 5	111.04	196.448	123.52	51.403	0	0	159.2	99.303	111.637	157.38	0	103.009	0	170.42	211.229	0	203.393	205.378	229.337	199.364	444.497	147.989	181.92	53.832	367.283	381.569	174.086	21.641	148.41	256.501	294.755	274.162	477.927	358.045	1808.47	158.058	534.917	153.427	279.937	374.27	151.704	216.682	268.24	1895.3	267.15	216.973	0	0
A2RTY6	Inter-alpha (Globulin) inhibitor H2	0	0	0	0	0	0	37.551	103.501	15.192	8.67	0	0	15.563	0	20.233	0	9.279	46.527	12.238	15.244	0	6.198	0	77.536	0	0	0	13.299	0	9.383	0	0	52.881	34.588	14.845	0	0	0	0	36.884	40.927	85.486	21.455	16.975	49.482	22.389	0	0
P19827	Inter-alpha-trypsin inhibitor heavy chain H1	109.302	53.187	113.619	84.365	0	0	297.591	83.134	52.303	48.201	81.255	107.786	232.962	127.951	88.971	0	12.097	47.464	149.55	306.128	0	26.201	71.975	174.869	119.745	32.859	43.71	626.743	96.938	64.709	0	56.336	46.967	320.472	3.819	64.331	91.333	11.268	4.245	162.501	43.127	87.579	130.517	68.088	195.289	179.354	139.308	31.606
Q14624	Inter-alpha-trypsin inhibitor heavy chain H4	0.686	0	0	0	0	0	0	0	0	0	0	0	0	0	0	0	0	0	0	0	0	7.405	0	0	0	22.816	44.461	19.286	1.425	0	0	9.227	0	13.661	0	0	0	0	0	7.645	0	0	0	0	0	0	0	0
P01042	Kininogen-1	3.389	9.661	1.748	2.344	0	188.346	0	51.262	0	0	38.017	0	0	0	0	0	0	0	0	0	0	16.299	0	31.608	0	0	0	20.905	0	0	0	0	0	1.505	15.942	0	0	0	0	0	0	22.435	9.015	8.966	19.959	0	45.017	50.619
P02750	Leucine-rich alpha-2-glycoprotein	0	8.354	0	11.089	0	28.787	59.137	0	75.87	0	0	178.306	0	0	51.235	0	0	0	0	45.314	0	0	467.811	0	0	60.262	0	77.707	14.398	0	0	0	0	0	0	0	0	0	0	0	0	13.782	0	0	49.315	66.045	0	0
Q09666	Neuroblast differentiation-associated protein AHNAK	29.107	11.608	25.161	7.957	99.871	0	13.193	17.064	5.273	0	0	14.784	0	0	0	0	0	5.148	0	4.721	0	0	18.833	0	0	0	0	0	0	0	8.441	0	1.002	4.769	0	0	0	0	0	0	0	0	0	0	0	0	165.044	120.217
Q5VST9	Obscurin	122.174	128.202	579.455	30.014	5000.65	348.907	245.77	1181.55	87.699	500.535	583.94	676.755	378.661	1345.75	1544.56	15518.9	0	344.976	331.303	113.773	0	0	446.816	7487.55	0	0	382.572	1392.86	358.321	0	125.758	421.084	214.157	55.432	0	0	130.121	128.447	125.801	266.999	414.989	315.856	1046.67	0	865.74	640.64	147.091	1729.39
Q9UBM4	Opticin	94.605	112.833	69.948	114.991	219.917	344.229	157.554	91.582	50.995	305.001	301.312	111.212	56.19	176.533	148.563	263.327	0	21.362	0	40.71	0	7.672	70.727	1127.74	0	114.714	58.186	46.002	75.964	0	169.658	85.155	31.532	73.281	5.796	9.982	6.532	12.973	9.825	27.346	0	26.644	42.599	0	289.172	130.423	146.769	375.813
P10451	Osteopontin	28.118	48.388	86.259	7.174	0	12.209	33.655	59.111	23.98	49.497	8.005	0	0	304.154	15.735	172.66	15.402	43.871	3.62	18.783	11.008	0	65.687	693.392	208.387	13.868	10.689	0	106.851	0	0	80.255	18.885	24.655	9.008	0	29.006	13.931	3.845	44.753	98.983	62.003	61.259	341.445	175.994	204.219	0	571.671
P36955	Pigment epithelium-derived factor	268.528	199.229	17.373	127.27	0	47.694	167.35	267.445	124.814	190.084	132.141	179.228	113.188	570.471	104.597	69.299	80.163	207.825	226.125	106.319	111.935	92.764	196.995	188.164	213.087	59.486	198.367	106.939	137.202	115.919	134.271	263.824	148.109	214.946	116.98	186.588	220.25	156.086	176.656	388.387	286.874	248.367	330.139	163.645	250.842	243.847	256.996	286.414
P00747	Plasminogen	4.598	34.381	0	0	0	0	14.256	23.99	0	46.974	54.34	0	0	0	25.829	0	0	0	12.725	19.553	0	0	0	0	0	0	0	11.824	0	0	9.512	0	12.595	30.624	0	0	6.884	8.074	4.91	0	0	0	0	0	0	0	17.529	0
P41222	Prostaglandin-H2 D-isomerase	2065.48	2059.99	1032.19	2834.92	7685.95	1353.85	1022.04	1795.4	518.672	1011.58	1929.52	1423.41	1788.52	8692.6	2868.74	27883.8	1457.78	1183.53	2777.59	1175.22	751.867	3916.84	6331.95	14487.3	3340.11	859.626	2029.21	1138.22	2448.73	181.492	426.343	2355.42	1758.28	1511.2	0	2626.84	2145.62	1692.24	1678.73	2774.32	3002.99	1517.16	4777.3	2727.01	3831.45	2786.74	3518.43	213.539
Q9NQC1	Protein Jade-2	0	2.622	0	0	0	0	1.107	0	0	0	0	0	0	0	0	0	0	0	3.067	0	0	0	0	0	0	0	0	0	0	0	0	0	0	0	0	0	0	0	0	0	0	0	0	0	0	0	0	0
P06702	Protein S100-A9	0	0	622.973	0	0	88.192	0.853	0	0.799	0	0	0	1.116	0	0	0	0	0	0	0	0	0	0	0	0	0	0	0	0	0	0	0	0	1.48	0	0	0	0	0	0	3.123	0	0	0	0	1.045	0	0
P00734	Prothrombin	20.747	0	0	0	0	0	357.116	0	31.482	0	0	0	0	0	0	0	38.887	0	0	50.214	0	31.111	0	0	0	0	0	0	0	0	157.165	0	36.66	35.509	27.385	0	0	0	0	0	0	66.549	0	0	0	0	0	0
P10745	Retinol-binding protein 3	81.661	165.323	256.252	84.899	1953.73	799.843	267.899	287.531	166.26	171.441	122.765	191.627	106.577	384.905	236.301	4405.38	126.123	240.361	249.481	103.636	157.896	146.005	162.416	2955.88	106.077	79.383	126.937	157.448	122.022	78.54	136.57	259.207	175.824	170.014	132.997	63.236	180.545	84.044	233.187	202.752	219.067	246.056	243.967	58.492	149.547	274.364	325.712	539.563
Q5UGI6	Serine/cysteine proteinase inhibitor clade G member 1 splice variant 2	4.264	5.064	0	11.631	0	4.771	45.354	20.967	4.748	6.906	5.039	0	5.21	112.258	61.985	0	0	149.063	74.105	24.041	24.793	0	0	56.711	0	9.294	8.902	35.88	22.042	4.114	11.967	0	0	28.206	2.117	0	51.514	4.497	54.115	0	0	53.965	0	0	7.069	5.677	0	7.816
P02787	Serotransferrin	545.77	590.583	288.042	647.892	469.21	69.839	275.646	175.241	301.881	247.014	220.027	266.123	148.125	569.461	141.553	222.797	187.969	297.757	308.552	226.406	225.802	199.449	189.788	234.648	290.88	294.803	173.396	58.285	304.344	225.549	198.833	233.082	274.27	374.472	245.79	191.113	218.265	221.076	248.74	473.705	334.16	370.341	407.287	354.326	277.187	293.99	700.4	674.064
P01011	SERPINA3 Alpha-1-antichymotrypsin	24.702	36.628	53.352	13.147	24.355	6.065	39.85	90.407	72.224	23.595	79.942	80.675	14.902	9.673	28.531	91.445	32.185	52.923	94.896	43.002	12.248	50.418	10.732	87.432	90.14	35.575	39.139	47.859	23.931	34.651	58.931	12.307	79.073	56.841	6.369	10.588	70.435	77.429	61.185	23.215	70.985	62.97	3.574	15.792	37.856	44.503	90.144	19.211
P02768	Serum albumin	3499.2	3673.11	4942.37	4140.7	3852.91	1125.58	2164.52	1239.12	2332.12	2764.5	3799.21	4052.97	3243.06	2579.84	1768.81	1386.19	1803.75	1618.05	1997.9	2189.67	2433.51	2386	2528.06	1125.15	1007.98	2087.32	1173.36	562.05	1574.04	2142.52	2155.68	2442.75	2166.71	2056.55	2914.32	2577.89	1777.75	2872.72	2316.86	1878.58	2712.07	1575.42	3887.39	2556.59	2660.13	2108.74	2822.66	3704.45
Q8WZ42	Titin	13.639	11.622	0	0	0	0	3.572	3.745	3.68	0	0	19.704	0	0	0	0	0	9.111	18.033	7.918	0	25.738	0	0	0	19.094	2.122	0	17.533	0	1.835	15.272	18.856	0	0	0	0	7.548	4.337	0	17.049	13.067	0	0	2.806	2.643	0	71.115
Q92616	Translational activator GCN1	146.86	113.513	0	28.197	0	0	466.926	0	177.406	29.924	18.908	0	0	0	22.459	0	192.476	355.15	0	140.656	0	1629.6	0	0	26.549	285.915	0	0	0	192.24	319.462	0	720.7	658.09	508.805	0	0	0	314.09	0	53.051	149.875	0	0	0	0	77.181	47.193
P02766	Transthyretin	1254.73	709.453	281.037	681.816	1110.03	147.237	533.548	484.864	106.026	187.749	127.96	0	105.486	1221.13	0	1331	157.914	522.686	498.187	423.671	375.961	229.214	0	0	285.626	75.156	7.866	77.523	6.746	117.963	505.208	283.794	189.751	439.819	393.92	27.682	572.378	0	410.644	853.052	766.055	573.315	429.59	26.329	6.528	42.639	2120.85	905.756
P02774	Vitamin D-binding protein	94.638	2.686	0.66	26.413	0	0	45.184	75.557	69.595	9.219	0	54.914	16.313	0	8.896	0	53.584	81.55	5.401	59.041	0	18.123	0	18.805	0	14.961	18.043	25.917	12.726	0	72.959	2.076	10.085	9.25	35.507	104.816	3.792	0	33.987	0	3.757	24.097	0	0	9.364	43.662	0	0
P04004	Vitronectin	22.82	0	0	0	0	3.096	22.88	14.008	0	33.589	12.893	14.605	0	0	17.54	0	36.087	231.007	15.984	291.097	0	0	238.456	0	32.368	32.798	59.064	47.686	22.515	0	32.619	22.821	55.427	44.88	55.209	18.756	60.191	335.647	0	572.423	14.503	37.492	336.023	20.199	47.011	27.312	0	0
P25311	Zinc-alpha-2-glycoprotein	2.303	1.708	0	0	0	0	50.863	0	84.405	9.52	0	0	12.943	0	38.876	0	0	13.478	96.007	32.617	0	0	0	0	0	41.233	45.629	23.349	5.275	0	9.377	0	7.871	42.279	45.447	0	6.084	22.451	37.162	84.644	207.549	0	148.206	0	184.05	79.213	0	62.97
[truncated: 20 more columns]
